# Supplementary material for: Treatments for gestational diabetes: a systematic review and meta-analysis
Source: PubMed Central journal article supplement (PMC5734427; doi:10.1136/bmjopen-2016-015557), 2017-06-24
Supplement: bmjopen-2016-015557.draft_revisions.pdf [file bmjopen-2016-015557.draft_revisions.pdf]

# BMJ Open

## Treatments for gestational diabetes: A systematic review and meta-analysis

|                                 |                                                                                                                                                                                                                                                                                                                                                                                                                                                                                                                  |
|---------------------------------|------------------------------------------------------------------------------------------------------------------------------------------------------------------------------------------------------------------------------------------------------------------------------------------------------------------------------------------------------------------------------------------------------------------------------------------------------------------------------------------------------------------|
| Journal:                        | <i>BMJ Open</i>                                                                                                                                                                                                                                                                                                                                                                                                                                                                                                  |
| Manuscript ID                   | bmjopen-2016-015557                                                                                                                                                                                                                                                                                                                                                                                                                                                                                              |
| Article Type:                   | Research                                                                                                                                                                                                                                                                                                                                                                                                                                                                                                         |
| Date Submitted by the Author:   | 13-Dec-2016                                                                                                                                                                                                                                                                                                                                                                                                                                                                                                      |
| Complete List of Authors:       | farrar, diane; Bradford Institute for Health research, Maternal and Child health<br>Simmonds, Mark; University of York, Centre for Reviews and Dissemination<br>Bryant , Maria ; University of Leeds,<br>Sheldon, Trevor; University of York, health Sciences<br>tuffnell, derek; Bradford Royal Infirmary, Women's and Newborn unit<br>Golder, Su; University of York, Department of Health Sciences<br>Lawlor, Debbie; Department of Social Medicine, University of Bristol, MRC Integrative Epidemiology Unit |
| <b>Primary Subject Heading</b>: | Obstetrics and gynaecology                                                                                                                                                                                                                                                                                                                                                                                                                                                                                       |
| Secondary Subject Heading:      | Diabetes and endocrinology                                                                                                                                                                                                                                                                                                                                                                                                                                                                                       |
| Keywords:                       | gestational diabetes, packages of care, insulin, metformin, glibenclamide, systematic review                                                                                                                                                                                                                                                                                                                                                                                                                     |
|                                 |                                                                                                                                                                                                                                                                                                                                                                                                                                                                                                                  |

SCHOLARONE™  
Manuscripts

only

1  
2  
3 **Treatments for gestational diabetes: A systematic review and meta-analysis**  
4  
5

6  
7 Diane Farrar\*, Bradford Institute for Health Research, Bradford Royal Infirmary and Department of  
8  
9 Health Sciences, University of York

10  
11 Mark Simmonds, Centre for Reviews and Dissemination, University of York

12  
13 Maria Bryant, Leeds Institute of Clinical Trials Research, University of Leeds

14  
15 Trevor A Sheldon, Hull York Medical School, University of York

16  
17 Derek Tuffnell, Bradford Women's and Newborn Unit, Bradford

18  
19 Su Golder, Department of Health Sciences, University of York

20  
21 Debbie A Lawlor, MRC Integrative Epidemiology Unit and School of Social and Community Medicine  
22  
23 at the University of Bristol  
24  
25

26  
27  
28  
29  
30  
31 \*Corresponding author

32  
33  
34 Email: Diane.Farrar@bthft.nhs.uk

35  
36  
37 Tel: 01274 383416  
38  
39  
40  
41  
42

43 Abstract word count: 371

44  
45  
46 Main text word count: 3723

47  
48 Running title: Treatments for gestational diabetes  
49  
50  
51  
52  
53  
54  
55  
56  
57  
58  
59  
60

**Abstract**

**Objective:** To investigate the effectiveness of different treatments for GDM.

**Design:** Systematic review, meta-analysis and network-analysis

**Methods:** Data sources were searched up to July 2016 and included: MEDLINE and Embase.

Randomised trials comparing treatments for GDM (packages of care (dietary and lifestyle interventions with pharmacological treatments as required), insulin, metformin, glibenclamide (glyburide)), were selected by two authors and double checked for accuracy. Outcomes included: large for gestational age; shoulder dystocia; neonatal hypoglycaemia; Caesarean section and pre-eclampsia. We pooled data using random-effects meta-analyses and used Bayesian network meta-analysis to compare pharmacological treatments (i.e. including treatments not directly compared within a trial).

**Results:** Forty two trials were included, the reporting of which was generally poor with unclear or high risk of bias. Packages of care varied in their composition and reduced the risk of most adverse perinatal outcomes compared to routine care (e.g. large for gestational age: RR 0.58 (95% CI 0.49-0.68;  $I^2=0\%$ ; trials=8; participants =3462). Network meta-analyses suggest metformin had the highest probability of being the most effective in reducing the risk of most outcomes compared to insulin or glibenclamide.

**Conclusions:** Evidence shows packages of care are effective in reducing the risk of most adverse perinatal outcomes. However trials are often poorly reported with unclear or high risk of bias. Large well-designed and conducted trials are urgently needed.

**Systematic Review Registration:** PROSPERO CRD42013004608

**Key words:** gestational diabetes; systematic review; meta-analysis; network analysis, treatments; packages of care; insulin; metformin; glibenclamide (glyburide)

**Strengths and limitations of this study:**

This systematic review evaluates available interventions for the treatment of gestational hyperglycaemia and includes a network-analysis comparing all pharmacological treatments for gestational diabetes.

A large number of trials conducted in varied populations have been included.

For some comparisons the numbers of trials included were few and outcomes reported were few.

Trial quality was generally poor with subsequent high or unclear risk of bias.

For peer review only

## Introduction

Treatment of gestational diabetes (GDM) aims to reduce hyperglycaemia and in turn reduce the risk of adverse perinatal outcomes including: large for gestational age (LGA), macrosomia, shoulder dystocia, neonatal hypoglycaemia and the need for Caesarean section. Diet modification is often used as first-line treatment and if partly or wholly unsuccessful, or where women have substantially elevated glucose at diagnosis, pharmacological treatments (metformin, glibenclamide (glyburide) and/or insulin) are offered.

Previous systematic reviews have investigated the effectiveness of treatments for GDM,<sup>1-11</sup> Although results from these reviews generally indicate that treatments reduce the risk of adverse perinatal outcomes, the searches have variable inclusion criteria and were undertaken between 2009<sup>1,5</sup> and 2014<sup>2-4,7,12 11 6,8,10,12</sup> with just one review with searches in 2015<sup>9</sup> and since then several trials have been published and recommended criteria for GDM diagnosis has changed. Some reviews have included observational studies and most do not review all treatments, with the exception of the Cochrane treatments review<sup>1</sup> (which is now out of date and has been divided for future updates) and the UK NICE guideline.<sup>12</sup> Consequently most previous reviews do not provide an assessment of all available treatments and most have not used a network meta-analysis to determine the most effective pharmacological treatment across all alternatives included in any randomised trial (RCT).

The aim of this study was to systematically review, and where appropriate pool all results from RCTs of the effect of any treatment on GDM and to determine which treatment is most effective.

## Methods

We conducted a systematic review, meta- and network-analysis to evaluate whether treatments for GDM reduce the risks of adverse perinatal outcomes and to compare the effectiveness of these treatments.

1  
2  
3 This review and meta-analysis was conducted in accordance with Cochrane systematic reviews<sup>13</sup> and  
4 the Centre for Reviews and Dissemination recommendations,<sup>14</sup> we have reported our findings  
5 following the PRISMA reporting guidelines.<sup>15</sup> This review forms part of a larger Health Technology  
6  
7  
8  
9 Assessment report of the diagnosis and management of GDM.<sup>16</sup>  
10

### 11 12 13 *Patient involvement*

14  
15  
16 The outcomes we included were from the Cochrane Pregnancy and Childbirth Group's standardised  
17  
18 outcomes for reviews of diabetes in pregnancy. Women who had experienced or had the potential  
19  
20 to experience GDM contribute to the design and appraisal of this group's methods and reviews and  
21  
22 therefore have influenced the design of this review and outcomes examined.<sup>17</sup>  
23  
24  
25

### 26 27 *Search methods*

28  
29  
30  
31 The search strategies were designed to identify records of RCTs of treatment for women with GDM,  
32  
33 added to search sources since the search date (July 2011, trials awaiting classification) of the  
34  
35 Cochrane 'treatments for GDM' review.<sup>1</sup> The bibliographic databases searched were MEDLINE and  
36  
37 MEDLINE in Process, Embase and the Cochrane Central Register of Controlled Trials. Strategies were  
38  
39 not restricted by language and were developed using a combination of subject indexing terms and  
40  
41 free text search terms in the title and abstract fields. Searches were first conducted in September  
42  
43 2013 and updated in October 2014 and 6th July 2016 using the same search strategies. Information  
44  
45 on studies in progress was sought by searching relevant trial registers including ClinicalTrials.gov.  
46  
47  
48  
49

50 We also searched previously published systematic reviews to ensure any eligible RCTs from these  
51  
52 were included in our review if eligible.<sup>2-9</sup> In addition we checked the references of included journal  
53  
54 articles. An example of search terms for MEDLINE are included in Supplementary file 1.  
55  
56  
57  
58  
59  
60

### *Study selection: Inclusion and exclusion criteria*

We included RCTs in which women with diagnosed GDM or impaired glucose tolerance (IGT) (using any definition) were randomised to a treatment designed to lower blood glucose (pharmacological or dietary modification) compared to routine antenatal care (however defined by the trial) or another treatment. Trials including women with pre-existing diabetes were excluded. Trials had to report effects on adverse perinatal outcomes. Included outcomes (defined in any way by the trials) were: gestational age at birth; birth weight (BW); macrosomia; large for gestational age (LGA); shoulder dystocia; preterm birth (less than 37 weeks gestation); neonatal hypoglycaemia; admission to neonatal intensive care unit (NICU); Caesarean section (elective or emergency); pre-eclampsia; pregnancy-induced hypertension (PIH); induction of labour; instrumental birth (forceps or ventouse); Apgar score at five minutes; and negative treatment effects (e.g. gastrointestinal upset, wellbeing). Data on side effects and quality of life measures were also examined. Conference abstracts and letters to journals were eligible for inclusion if they reported sufficient outcome data.

### **Data extraction and risk of bias assessment**

Title and abstract screening and then full text screening was performed by two reviewers (DF, MS, MB or SG) with disagreements resolved by consensus or by the third reviewer. The risk of bias of the included trials was assessed using the Cochrane risk of bias tool,<sup>18</sup> which considers: sequence generation, allocation concealment, blinding of participants and medical staff to treatment allocation, blinding of assessors, loss to follow up, selective reporting of outcomes and other sources of bias. Each criterion was classified as being at low or high risk of bias, or unclear. Two reviewers independently assessed all criteria (DF, MS or SG).

### Statistical analysis

Trials were divided into categories according to the included treatments: (1) insulin versus metformin; (2) insulin versus glibenclamide (glyburide); (3) metformin versus glibenclamide; (4) packages of care: diet or dietary advice with or without exercise or glucose monitoring, with or without supplemental metformin, glibenclamide or insulin, compared to routine antenatal care; (5) comparisons of different dietary modifications.

For dichotomous outcomes, the relative risk comparing each group, with its 95% confidence interval, was calculated from the numbers of outcome events in each randomised group and the number randomised to each group. For continuous outcomes, the difference in means between groups was calculated from the mean and standard deviation of the outcome. For each outcome, and within each of the treatment categories, relative risks or differences in means were pooled in random-effects DerSimonian-Laird meta-analyses.<sup>19</sup> Heterogeneity was assessed using  $I^2$ .<sup>20</sup> Analyses were performed to investigate differences in risk of outcomes across varying degrees of hyperglycaemia (defined by a positive/negative GDM screening and diagnostic test). Because of the large number of treatments and outcome comparisons, pooled estimates only are presented in the main paper. Tests for publication bias were considered, but not performed, because there were insufficient trials in any meta-analysis for such tests to be reliable.

We conducted a network meta-analysis to combine information across multiple treatments simultaneously, this combines direct and indirect data to improve the estimation of the effectiveness of treatments and specifically to try to estimate which is the most effective of a number of different treatment options.<sup>21</sup> Analyses were undertaken for each dichotomous outcome using a Bayesian approach, based on the models originally created by Lu and Ades,<sup>22</sup> using the OpenBUGS<sup>23</sup> software. Each model generated a comparison between treatments, expressed as an odds ratio, and percentage indicating the probability that the treatment was the best treatment to



1  
2  
3 reduce the incidence of the adverse outcome. This approach was not possible for continuously  
4 measured outcomes and so was not undertaken for gestational age, birthweight and Apgar score. As  
5  
6 there were no trials comparing diet modification to pharmacological treatments, diet modification  
7  
8 could not be included in the network meta-analyses.  
9  
10

## 11 12 13 14 **Results**

### 15 16 *Details of included and excluded trials*

17  
18 12234 citations were identified by the original and the two update searches. These citations were  
19  
20 combined with three additional citations identified by previous systematic reviews conducted prior  
21  
22 to our first searches.<sup>1-5</sup> Following de-duplication and inclusion of additional records, 6437 citations  
23  
24 were reviewed. Of these, 214 were judged potentially eligible based on title and abstract. After  
25  
26 obtaining the full text publications and assessing eligibility, 42 trials were included and 35 of these  
27  
28 were combined in at least one meta-analysis (Figure 1).  
29  
30

31  
32  
33 Having extracted data from the RCTs assessing packages of care and dietary intervention  
34  
35 comparisons (Table 1), we decided that it was not appropriate to pool results from trials comparing  
36  
37 dissimilar dietary modification interventions (Table 1). Packages of care included various  
38  
39 combinations of interventions, however all packages of care compared with routine care trial results  
40  
41 were pooled in meta-analyses.  
42  
43

44  
45  
46 We included nine publications not included in any previous published review. Two compared  
47  
48 metformin and insulin,<sup>24,25</sup> one, glibenclamide and insulin,<sup>26</sup> four, packages of care with routine  
49  
50 care<sup>27-30</sup> and two compared different dietary modification interventions.<sup>31,32</sup> Seven of these trials  
51  
52 were reported after the search dates of the previous reviews and were published in 2014 or 2015,  
53  
54 the remaining two trials (dietary modification interventions or packages of care) did not fulfil other  
55  
56  
57  
58  
59  
60

1  
2  
3 review's inclusion criteria. Few trials reported side effects or measures of participant satisfaction or  
4  
5 wellbeing.

6  
7  
8  
9 Trials generally included women with GDM diagnosed following a 75g or 100g oral glucose tolerance  
10  
11 test (OGTT) using a variety of international<sup>33,34,35</sup> and locally<sup>36,37</sup> recommended thresholds, though  
12  
13 some included women with 'mild or borderline' GDM (positive OGCT, negative OGTT) and others  
14  
15 included women with 'impaired glucose tolerance' (IGT), current diagnostic criteria<sup>12,38</sup> however may  
16  
17 now consider these women as having GDM rather than a separate and milder condition.  
18  
19

#### 20 21 22 *Quality –Risk of bias assessment*

23  
24 Overall, reporting of, and many aspects of trial quality, was poor with the result that risk of bias was  
25  
26 generally unclear or high (Supplementary Table 1). The randomisation procedure and group  
27  
28 allocation was rarely described, although all trials reported that participants were 'randomised'.  
29  
30 Blinding of participants, medical staff and outcome assessors was generally not reported, but as  
31  
32 most trials include some additional intervention above routine care such as diet advice or a  
33  
34 pharmacological treatment, it is probable that participants and most clinicians could not be blinded,  
35  
36 though outcome assessment could have been. Most trials had reasonably complete outcome data  
37  
38 and loss to follow-up was low, though for some trials analysis was not conducted on an intention to  
39  
40 treat basis (so the analysis did not include all women randomised). Selective reporting was assessed  
41  
42 as minimal as the majority of trials presented results for all pre-specified outcomes (the possibility  
43  
44 that some trials collected data on outcomes, but did not report them cannot be ruled out however).  
45  
46  
47

48  
49 Generally, women were eligible for inclusion in trials evaluating pharmacological treatments if they  
50  
51 were unable to achieve adequate glycaemic control with dietary and lifestyle management.

52  
53 Therefore there is the possibility that those included may have had more severe or refractory  
54  
55 hyperglycaemia or may adhere less well to lifestyle interventions than those women who did not  
56  
57

1  
2  
3 require pharmacological treatments to control hyperglycaemia. The specific criteria for the addition  
4 of supplemental insulin in trials were often not reported, though some trials did report that  
5 supplemental insulin was prescribed if 'glycaemic control was not achieved by participants'. It is  
6 probable that thresholds for what is defined as 'good' control differed between trial centres (if  
7 multi-site) and trials.  
8  
9  
10  
11  
12

### 13 14 15 16 17 *Packages of care and dietary modification trials*

18  
19 Twelve trials evaluated a package of care (a combination of treatments starting with dietary  
20 modification and/or exercise and/or monitoring and/or supplemental pharmacological treatments)  
21 (Table 1)<sup>27-30,39-46</sup> compared to routine care. Data from these 12 trials are combined in at least one  
22 meta-analysis (Figure 2a).  
23  
24  
25  
26  
27

28  
29 Seven trials<sup>31,32,47-52</sup> evaluated a variety of dietary modifications and compared them to other dietary  
30 modifications (Table 1). The composition of each dietary modification was generally well reported,  
31 however the interventions and comparisons were too diverse to allow pooling of data. There was no  
32 evidence that one type of dietary modification was superior over another, though trials included few  
33 women (Figure 2a). None of these seven trials reported side effects or quality of life measures.  
34  
35  
36  
37  
38  
39  
40

41  
42 The composition of the dietary modification was poorly reported in the 'packages of care' trials (the  
43 12 trials included in the meta-analyses). Overall (in all packages of care and dietary modification  
44 trials), 10 out of 19 trials reported that insulin was provided if required, in one trial insulin was only  
45 provided if needed in the intervention group and for the remainder it was unclear or not reported if  
46 supplemental insulin was provided. The screening and diagnostic tests, criteria and glucose  
47 thresholds used to define GDM (and included/exclude women in the trials) varied across the trials  
48  
49  
50  
51  
52  
53  
54  
55  
56  
57  
58  
59  
60

1  
2  
3 (Table 1). For the meta-analysis the varying forms of dietary modification and/or pharmacological  
4  
5 treatment use was not examined.  
6  
7

8  
9 Packages of care (starting with dietary modification and possibly including monitoring and  
10  
11 pharmacological interventions) reduced the risk of shoulder dystocia by 60%, LGA and macrosomia  
12  
13 by around 50%, pre-eclampsia by 20% and the incidence of Caesarean section by 10% compared to  
14  
15 routine care (Figure 2a) though for pre-eclampsia and Caesarean section the confidence intervals  
16  
17 included the null value. BW was reduced by approximately 110g in the packages of care compared to  
18  
19 routine care group (Figure 2a). The degree of heterogeneity ( $I^2$ ) varied by outcome from 0% to 77%.  
20  
21 No 'packages of care trial' reported side effects; two trials reported quality of life scores<sup>41,42</sup>  
22  
23 indicating higher (better) quality of life scores for women in the intervention compared to the  
24  
25 routine care group.  
26  
27

### 28 29 30 *Trials comparing metformin with insulin*

31  
32 Eleven trials compared metformin with Insulin (Table 2).<sup>24,25,37,53-60</sup> However most trials reported  
33  
34 supplemental insulin use in the metformin group with the exception of two trials.<sup>25,59</sup> The risk of  
35  
36 most outcomes, including LGA, macrosomia, NICU admission, neonatal hypoglycaemia, pre-  
37  
38 eclampsia, PIH and induction of labour (IOL), was lower in those randomised to metformin rather  
39  
40 than insulin; instrumental delivery was greater in those randomised to insulin (Figure 2b).  
41  
42 Birthweight, gestational age and Apgar score as continuous measurements did not differ notably  
43  
44 between the two treatments (Figure 2b). Six trials reported the proportion of women with  
45  
46 metformin associated gastrointestinal upset (between 4% to 46%).<sup>24,53-55,58,60</sup> No trial reported  
47  
48 quality of life measures.  
49  
50  
51  
52  
53  
54  
55  
56  
57  
58  
59  
60

### *Trials comparing glibenclamide (glyburide) with insulin*

Nine trials compared glibenclamide with insulin (Table 3).<sup>26,61-68</sup> Figure 2c shows the relative risks of dichotomous outcomes, suggesting insulin may be relatively more effective than glibenclamide in reducing the risk of several adverse outcomes, confidence intervals are wide and include the null value however. There was no difference between insulin and glibenclamide for continuous outcomes (Figure 2c). One trial reported that glibenclamide was associated with side effects in 3/48 (6%) of women.<sup>66</sup> No trial reported quality of life measures .

### *Trials comparing glibenclamide (glyburide) with metformin*

Only three trials were identified that directly compared glibenclamide with metformin and these were relatively small trials including between 149 and 200 women (Table 4).<sup>69-71</sup> Figure 2d shows the risk of dichotomous and continuous outcomes respectively. These suggest metformin is more effective at reducing risk of LGA and possibly macrosomia. However, for several of the outcomes (for example LGA) only data from one of these trials is available, it is therefore not possible to make robust conclusions about the relative benefits of metformin and glibenclamide from these direct comparisons. No trials reported side effects or quality of life measures.

### *Network meta-analysis comparing glibenclamide (glyburide), insulin and metformin*

Table 5 the estimated probability of a treatment being the most effective at reducing the risk of each dichotomous outcome. Only dichotomous outcomes reported in at least two glibenclamide trials (either in comparison to insulin or metformin) were included in these analyses to ensure there were sufficient trials (and participants) included. When all three treatments are jointly compared, these analyses suggest that, for all outcomes, with the exception of Caesarean section, metformin is most likely to be the most effective treatment, with its probability of being most effective in reducing risk being 96.3, 94.0%, 92.8%, 84.0% and 61.2% respectively for neonatal hypoglycaemia, macrosomia,

1  
2  
3 LGA, pre-eclampsia and admission to NICU (the probability of being most effective for reducing risk  
4 of Caesarean section was 9.7% for metformin, glibenclamide was most likely to be most effective at  
5 reducing the risk of Caesarean section (79.9%)). Supplementary Figure 3 shows all two way  
6 comparisons between the treatments (e.g. metformin vs insulin). These confirm the direct  
7 comparisons described above, in suggesting that metformin is more effective than insulin or  
8 glibenclamide at reducing the majority of adverse outcomes, however many of these comparisons  
9 are based on small numbers and have wide confidence intervals that sometimes include the null  
10 value.  
11  
12  
13  
14  
15  
16  
17  
18  
19  
20  
21  
22

### 23 Discussion

24 The key finding of our review is that, despite understanding of hyperglycaemia/GDM and its  
25 relationship to adverse perinatal outcomes having existed for at least seven decades,<sup>72</sup> and 42 RCTs  
26 completed on its treatment; trials are still being conducted that are of limited size and of poor  
27 quality (with subsequent unclear or high risk of bias). Given the changing characteristics of the  
28 population and the lower fasting diagnostic threshold (compared to previous criteria<sup>34</sup>)  
29 recommended by the IADPSG<sup>38</sup> and UK NICE,<sup>12</sup> it is important to understand how treatments affect  
30 outcomes for these women. Trials do not always report GDM diagnostic criteria clearly and this is  
31 important considering the potential influence on GDM population size and the magnitude of  
32 effect.<sup>12,38</sup> Our detailed review, including only evidence from RCTs, provides some support for a 'step  
33 up approach' in the treatment of hyperglycaemia, from dietary interventions, through addition of  
34 metformin (in preference to glibenclamide (glyburide)) through to addition of insulin. Considering  
35 hyperglycaemia in pregnancy has various causes, using an integrated individual approach to its  
36 management, is likely to work best.  
37  
38  
39  
40  
41  
42  
43  
44  
45  
46  
47  
48  
49  
50  
51  
52  
53

54 We have taken a pragmatic approach to evaluating the many trials examining treatment packages of  
55 care for women diagnosed with hyperglycaemia/GDM so that our results will be generalisable to  
56  
57  
58  
59  
60

1  
2  
3 most clinical situations. Previous reviews have also suggested packages of care with a 'step up'  
4 approach are most effective.<sup>1,3-5</sup> The number of trials and women included in previous reviews  
5 varies. One of the most recent reviews had broadly similar inclusion criteria to ours, comparing any  
6 package of care for the treatment of GDM with no treatment (routine care) and included five trials  
7 with 2643 women.<sup>3</sup> Our review includes all these trials, plus a further seven (included in the meta-  
8 analysis) increasing the number of women to 4512 and indicating that RCTs in this area continue to  
9 be conducted, but not with the size or quality that allows us to have a robust evidence base for the  
10 treatment of GDM in a contemporary population. Pooled estimates are generally consistent across  
11 reviews irrespective of the number of trials included, because estimates are driven in all reviews by  
12 the two largest, which are also the highest quality trials, however these trials were conducted in  
13 populations using diagnostic criteria that would provide populations with more severe  
14 hyperglycaemia (and therefore the potential for a larger effect size).<sup>41,44</sup> For example, our analysis  
15 shows the risk of macrosomia is halved when a package of care is provided compared to routine care  
16 (11 trials, RR 0.49, 95% CI 0.39-0.62), confirming estimates from the most recent previous review (RR  
17 0.50 95% CI 0.35-0.71).<sup>3</sup> These two large and well-conducted RCTs were published in 2005 and  
18 2009,<sup>41,44</sup> and since then several smaller and poorer quality trials have been published. These two  
19 previous large well-conducted trials cannot provide precise estimates of effect on the wider range of  
20 adverse outcomes and for women diagnosed using more recently recommended criteria. Hence, we  
21 feel it is important to place a moratorium on further small RCTs in this area and that funders should  
22 consider commissioning a multi-centre large-scale RCT with adequate power to determine the effect  
23 and cost-effectiveness of different packages of care on adverse outcomes in women with GDM.  
24  
25  
26  
27  
28  
29  
30  
31  
32  
33  
34  
35  
36  
37  
38  
39  
40  
41  
42  
43  
44  
45  
46  
47  
48

49 The evidence to support metformin use, though encouraging has certain weaknesses. Firstly  
50 although there is a general 'trend' in favour of metformin use over insulin and glibenclamide  
51 (glyburide), confidence intervals are wide, in both the direct and network meta-analysis comparing  
52 each two-way treatment effect. Secondly the reporting of trial methods was generally poor with  
53  
54  
55  
56  
57  
58  
59  
60

1  
2  
3 'unclear or high risk of bias' and many trials included relatively few women and reported few  
4  
5 outcomes. Thirdly, in most trials directly comparing metformin with insulin, women receiving  
6  
7 metformin were also given supplemental insulin 'if required'; in one of the largest trials this equated  
8  
9 to 46% of the metformin group.<sup>54</sup> Therefore our results more appropriately relate to metformin's  
10  
11 greater effectiveness as a first-line treatment for GDM rather than a standalone treatment  
12  
13 compared to insulin.  
14  
15

16  
17 In addition to being an effective first-line pharmacological treatment for GDM, metformin may also  
18  
19 be preferred by women as it is administered orally and can be stored at room temperature,  
20  
21 compared to insulin that requires subcutaneous injection and refrigerated storage. Metformin is  
22  
23 sometimes associated with gastrointestinal upset, which may affect compliance and quality of life.  
24  
25

26  
27  
28 Few trials have reported side effects or measures of participant satisfaction or wellbeing, all  
29  
30 important outcomes that have the potential to impact health and therefore should be evaluated.  
31

32 Recent guidance<sup>12,38</sup> recommends lower glucose thresholds compared to those previously  
33  
34 recommended to diagnose GDM<sup>33,34</sup> (and used in the included trials). Therefore it is possible that a  
35  
36 greater proportion of women diagnosed with GDM will require only diet modification or less  
37  
38 'intensive' management compared to those previously diagnosed with GDM, because their  
39  
40 hyperglycaemia is less severe. There is a continuum of increasing risk of adverse outcomes across  
41  
42 the spectrum of glucose however<sup>73,74</sup> therefore interventions to reduce hyperglycaemia even at  
43  
44 lower glucose levels are likely to improve outcomes, but this needs confirming by large well-  
45  
46 designed RCTs.  
47  
48  
49  
50  
51  
52  
53  
54  
55  
56  
57  
58  
59  
60



### *Strengths and limitations*

This systematic review and meta-analysis includes a large number of trials with varied populations, and examines the effectiveness of treatment packages and diets as well as individual pharmacological treatments for reducing the risk of adverse perinatal outcomes.

For some comparisons, trials and numbers of women were few, as were outcomes reported. Trial quality was generally poor with subsequent high or unclear risk of bias. GDM diagnostic criteria varied across trials and recently recommended thresholds are lower now compared to when most included trials were conducted.

Lower glucose threshold criteria recommended by the International Association of Diabetes and Pregnancy Study Groups<sup>38</sup> and subsequently endorsed by the World Health Organization<sup>75</sup> aim to identify offspring at risk of obesity through its association with LGA (birth weight >90th percentile), cord C-peptide >90th percentile and percentage body fat >90th percentile. However there are no trials that have used these criteria and the classification of less severe hyperglycaemia when lower glucose thresholds are used to diagnose GDM may reduce the magnitude of the effect of interventions, compared to those reported by earlier trials using higher glucose thresholds. There has also been no longer-term follow up conducted to evaluate the treatment of GDM and the effects on risk of offspring obesity. Importantly, few of the trials that we reviewed had reported side effects or measures of participant satisfaction or wellbeing.

### *Implications for practice*

This review provides reassurance that a package of care where a 'step up' approach of firstly providing dietary and lifestyle advice, then adding supplementary metformin or insulin if glucose levels are not adequately controlled, is a reasonable and effective approach compared to providing just routine antenatal care, particularly with regards to reducing the risk of LGA. However, it has also

1  
2  
3 highlighted the general poor quality of recent small RCTs that do not improve the evidence base, but  
4  
5 subject women with GDM to unnecessary 'experimentation' and are a cost to society.  
6

7  
8 Metformin seems to be an effective alternative to insulin, if diet modification inadequately controls  
9  
10 hyperglycaemia, however supplemental insulin may be required in up to 50% of women.<sup>54</sup> There is a  
11  
12 need to cease further small RCTs in this area and conduct large well-designed RCTs that clarify the  
13  
14 most effective treatment across a range of outcomes, including those that are likely to be important  
15  
16 to women such as quality of life measurements and those identified by the Cochrane Pregnancy and  
17  
18 Childbirth Group (CPCG) as being essential for trials and reviews of diabetes in pregnancy. These  
19  
20 should be incorporated into current diagnostic criteria and ideally look at longer-term outcomes in  
21  
22 mothers and offspring.  
23  
24  
25  
26  
27  
28

### 29 **Acknowledgements**

30  
31 Thank you to Julie Glanville and Mick Arber of the York Health Economics Consortium, University of  
32  
33 York, UK, who carried out the searches.  
34  
35  
36

### 37 **Details of ethics approval**

38  
39 This study did not require ethical approval as the data used have been published previously, and  
40  
41 hence are already in the public domain.  
42  
43  
44

### 45 **Contribution to authorship**

46  
47 DF, MS, DAL and TAS designed the study. MS wrote the statistical analysis plan. DF monitored the  
48  
49 review process. DF, MS, MB, DAL, TAS, DT and FD interpreted the data, DF, MS, MB and SG assessed  
50  
51 studies for inclusion. MS cleaned and analysed the data, DF wrote the draft paper. All authors have  
52  
53 approved the final version. Diane Farrar is guarantor and takes responsibility for the content of this  
54  
55 article.  
56  
57  
58  
59  
60

### **Funding**

This work was supported by the National Institute for Health Research (NIHR), Health Technology Assessment (HTA) programme, project number 11/99/02. DF holds a NIHR Post-doctoral Research Fellowship award (PD-2014-07-019). DAL works in a Unit that is supported by the University of Bristol and UK Medical Research Council ((MC\_UU\_12013/5) and she holds a NIHR Senior Investigator award (NF-SI-0611-10196). The views and opinions expressed therein are those of the authors and do not necessarily reflect those of the HTA, NIHR, MRC, UK National Health Service (NHS) or the Department of Health.

### **Data sharing**

Extracted data are available upon request to the corresponding author

**Competing interests:** All authors have completed the ICMJE uniform disclosure form at [www.icmje.org/coi\\_disclosure.pdf](http://www.icmje.org/coi_disclosure.pdf) and declare: no support from any organisation for the submitted work; no financial relationships with any organisations that might have an interest in the submitted work in the previous three years; no other relationships or activities that could appear to have influenced the submitted work.

## References

1. Alwan N, Tuffnell D, West J. Treatments for gestational diabetes. *Cochrane Database of Syst Rev*. 2009; Issue 3:CD003395.
2. Gui J, Liu Q, Feng L. Metformin vs insulin in the management of gestational diabetes: a meta-analysis. *PLoS one*. 2013; 8(5): e64585.
3. Hartling L, Dryden DM, Guthrie A, Muise M, Vandermeer B, Donovan L. Benefits and harms of treating gestational diabetes mellitus: a systematic review and meta-analysis for the U.S. Preventive Services Task Force and the National Institutes of Health Office of Medical Applications of Research. *Ann Intern Med*. 2013; 159(2): 123-9.
4. Falavigna M, Prestes I, Schmidt MI, Duncan BB, Colagiuri S, Roglic G. Impact of gestational diabetes mellitus screening strategies on perinatal outcomes: a simulation study. *Diabetes Res Clin Pract*. 2012; 99(3): 358-65.
5. Horvath K, Koch K, Jeitler K, Matyas E, Ralf Bender R, Hilda Bastian H, et al. Effects of treatment in women with gestational diabetes mellitus: systematic review and meta-analysis. *BMJ*. 2010; 340: 1395-413.
6. Balsells M, García-Patterson A, Solà I, Roqué M, Gich I, Corcoy R. Glibenclamide, metformin, and insulin for the treatment of gestational diabetes: a systematic review and meta-analysis. *BMJ [Journal Article]* 2015 2015-01-21 16:06:23 [cited 350; Available from: <http://www.bmj.com/bmj/350/bmj.h102.full.pdf>
7. Han S, Crowther CA, Middleton P, Heatley E. Different types of dietary advice for women with gestational diabetes mellitus. *Cochrane Database Syst Rev*. 2013; (3).
8. Jiang Y-F, Chen X-Y, Ding T, Wang X-F, Zhu Z-N, Su S-W. Comparative efficacy and safety of OADs in management of GDM: network meta-analysis of randomized controlled trials. *J Clin Endocrinol Metab*. 2015; 100(5): 2071-80.
9. Amin M, Suksomboon N, Poolsup N, Malik O. Comparison of glyburide with metformin in treating gestational diabetes mellitus: a systematic review and meta-analysis. *Clin Drug Investig*. 2015; 35(6): 343-51.
10. Kitwitee P, Limwattananon S, Limwattananon C, Waleekachonlert O, Ratanachotpanich T, Phimphilai M, et al. Metformin for the treatment of gestational diabetes: An updated meta-analysis. *Diabetes Res Clin Pract*. 2015; 109(3): 521-32.
11. Zhao L-P, Sheng X-Y, Zhou S, Yang T, Ma L-Y, Zhou Y, et al. Metformin versus insulin for gestational diabetes mellitus: a meta-analysis. *Br J Clin Pharmacol*. 2015; 80(5): 1224-34.
12. National Institute for Health and Care Excellence. Diabetes in pregnancy: management of diabetes and its complications from preconception to the postnatal period. *National collaborating centre for Women's and Children's Health*. 2015.
13. Higgins JPT, Green S, editors. *Cochrane Handbook for Systematic Reviews of Interventions* Version 5.1.0 [updated March 2011]. *The Cochrane Collaboration*. 2011; Available from [www.cochrane-handbook.org](http://www.cochrane-handbook.org).
14. Centre for Reviews and Dissemination. *Systematic reviews: CRD's guidance for undertaking a systematic review* York: CRD, University of York 2009.
15. Preferred Reporting Items for Systematic Reviews and Meta-Analyses. PRISMA. <http://wwwprisma-statement.org>. Last accessed June 2015.
16. Farrar D, Fairley L, Tuffnell D, Wright J, Sheldon T, Bland M, et al. A clinical and economic evaluation of screening and diagnostic tests to identify and treat women with gestational diabetes: association between maternal risk factors, glucose levels, and adverse outcomes. *HTA*. 2013; <http://www.nets.nihr.ac.uk/projects/hta/119902>.
17. Sakala C, Gyte G, Henderson S, Neilson JP, Horey D. Consumer-Professional Partnership to Improve Research: The Experience of the Cochrane Collaboration's Pregnancy and Childbirth Group. *Birth*. 2001; 28(2): 133-7.

18. The Cochrane Collaboration. The Cochrane Collaboration's tool for assessing risk of bias. <http://ohqcochraneorg/sites/ohqcochraneorg/files/uploads/Risk%20of%20bias%20assessment%20tool.pdf>. last accessed Jan 2014.
19. DerSimonian R, Laird N. Meta-analysis in clinical trials. *Control Clin Trials*. 1986; 7(3): 177-88.
20. Higgins JPT, Thompson SG. Quantifying heterogeneity in a meta-analysis. *Stats Med*. 2002; 21(11): 1539-58.
21. Bafeta A, Trinquart L, Seror R, Ravaud P. Reporting of results from network meta-analyses: methodological systematic review. *BMJ*. 2014; 348.
22. Lu G, Ades AE. Combination of direct and indirect evidence in mixed treatment comparisons. *Stat Med*. 2004; 23(20): 3105-24.
23. openbugs. <http://www.openbugs.net/w/FrontPage>. last accessed January 2015.
24. Ainuddin J, Karim N, Hasan AA, Naqv iSA. Metformin versus insulin treatment in gestational diabetes in pregnancy in a developing country. A randomized control trial. *Diab Res Clin Prac*. 2014.
25. Zinnat ANS, Shareen S, Rahman S. Can metformin be used in place of insulin for the treatment of GDM for low resource countries? *BJOG*. 2013; 120: 35.
26. Mirzamoradi M, Bakhtiyari M, Kimiaee P, Hosseini-Najarkolaei A, Mansournia MA. Investigating the effects of treatment based on single high blood glucose in gestational diabetes screening on maternal and neonatal complications. *Arch Gynecol Obstet*; 2015. p. 687-95.
27. Deveer R, Deveer M, Akbaba E, Engin-Ustun Y, Aydogan P, Celikkaya H, et al. The effect of diet on pregnancy outcomes among pregnant with abnormal glucose challenge test. *Eur Rev Med Pharmacol Sci*. 2013; 17(9): 1258-61.
28. Fadl HE, Gardefors S, Hjertberg R, Nord E, Persson B, Schwarcz E, et al. Randomized controlled study in pregnancy on treatment of marked hyperglycemia that is short of overt diabetes. *Acta Obstet Gynecol Scand*. 2015; 94(11): 1181-7.
29. Yang X, Hsu-Hage B, Dong L, Shao P, Wang H, Tian H, et al. Intensive Diabetes Management May Improve Pregnancy. *Diabetes Care*. 2003; 26(1): 254.
30. Yang X, Tian H, Zhang F, Zhang C, Li Y, Leng J, et al. A randomised translational trial of lifestyle intervention using a 3-tier shared care approach on pregnancy outcomes in Chinese women with gestational diabetes mellitus but without diabetes. *J Transl Med*; 2014.
31. Ma W-J, Huang Z-H, Huang B-X, Qi B-H, Zhang Y-J, Xiao B-X, et al. Intensive low-glycaemic-load dietary intervention for the management of glycaemia and serum lipids among women with gestational diabetes: a randomized control trial. *Public Health Nutr*. 2015; 18(8): 1506-13.
32. Yao J, Cong L, Zhu B, Wang T. Effect of dietary approaches to stop hypertension diet plan on pregnancy outcome patients with gestational diabetes mellitus. *Bangladesh J Pharmacol*. 2015; 10(4): 732-8.
33. American College of Obstetricians and Gynecologists. Practice Bulletin Clinical Management Guidelines for Obstetricians - Gynecologists. *Obstet Gynecol*. 2013; 122(2): 406-16.
34. World Health Organization. Definition, diagnosis and classification of diabetes mellitus and its complications. Report of a WHO consultation. Part 1: diagnosis and classification of diabetes mellitus. Geneva: WHO; 1999.
35. American Diabetes Association. Standards of Medical Care in Diabetes - 2014. *Diabetes Care* 2014; 37(Supp 1): S14-80.
36. Ijäs H, Väärasmäki M, Morin-Papunen L, Keravuo R, Ebeling T, Saarela T, et al. Metformin should be considered in the treatment of gestational diabetes: a prospective randomised study. *BJOG*. 2011; 118(7): 880-5.
37. Tertti K, Ekblad U, Koskinen P, Vahlberg T, Ronnema T. Metformin vs. insulin in gestational diabetes. A randomized study characterizing metformin patients needing additional insulin. *Diabetes Obes Metab*. 2013; 15(3): 246-51.
38. International Association of Diabetes and Pregnancy Study Groups Consensus panel. International Association of Diabetes and Pregnancy Study Groups Recommendations on the Diagnosis and Classification of Hyperglycemia in Pregnancy. *Diabetes Care*. 2010; 33(7): 676-82.

- 1  
2  
3 39. Bevier WC, Fischer R, Jovanovic L. Treatment of women with an abnormal glucose challenge test  
4 (but a normal oral glucose tolerance test) decreases the prevalence of macrosomia. *Am J Perinatol*;  
5 1999. p. 269-75.
- 6 40. Bonomo M, Corica D, Mion E, Goncalves D, Motta G, Merati R, et al. Evaluating the therapeutic  
7 approach in pregnancies complicated by borderline glucose intolerance: a randomized clinical trial.  
8 *Diabet Med*. 2005; 22(11): 1536-41.
- 9 41. Crowther CA, Hiller JE, Moss JR, McPhee AJ, Jeffries WS, Robinson JS. Effect of treatment of  
10 gestational diabetes mellitus on pregnancy outcomes. *N Engl J Med*. 2005; 352(24): 2477-86.
- 11 42. Elnour AA, Mugammar IT, Jaber T, Revel T, McElnay JC. Pharmaceutical care of patients with  
12 gestational diabetes mellitus. *J evaluat clin prac*; 2008. p. 131-40.
- 13 43. Garner P, Okun N, Keely E, Wells G, Perkins S, Sylvain J, et al. A randomized controlled trial of  
14 strict glycemic control and tertiary level obstetric care versus routine obstetric care in the  
15 management of gestational diabetes: A pilot study. *Am J Obstet Gynecol*. 1997; 177(1): 190-5.
- 16 44. Landon MB, Spong CY, Thom E, Carpenter MW, Ramin SM, Casey B, et al. A multicenter,  
17 randomized trial of treatment for mild gestational diabetes. *N Engl J Med*. 2009; 361: 1339-48.
- 18 45. Li DF, Wong VC, O'Hoy KM, Yeung CY, Ma HK. Is treatment needed for mild impairment of  
19 glucose tolerance in pregnancy? A randomized controlled trial. *BJOG*; 1987. p. 851-4.
- 20 46. O'Sullivan JB, Mahan CM. Insulin treatment and high risk groups. *Diabetes Care*. 1980; 3(3): 482-  
21 5.
- 22 47. Asemi Z, Samimi M, Tabassi Z, Esmailzadeh A. The effect of DASH diet on pregnancy outcomes in  
23 gestational diabetes: a randomized controlled clinical trial. *Eur J Clin Nutr*. 2014; 68(4): 490-5.
- 24 48. Cao X, Wang Z, Yang C, Mo X, Xiu L, Li Y, et al. Comprehensive intensive therapy for Chinese  
25 gestational diabetes benefits both newborns and mothers. *Diabetes Technol Ther*. 2012; 14(11).
- 26 49. Cypryk K, Kaminska P, Kosinski M, Petynska-Marczewska M, Lewinski A. A comparison of the  
27 effectiveness, tolerability and safety of high and low carbohydrate diets in women with gestational  
28 diabetes. *Endokryno Pol*; 2007. p. 314-9.
- 29 50. Louie JCY, Markovic TP, Perera N, Foote D, Petocz P, Ross GP, et al. A randomized controlled trial  
30 investigating the effects of a low-glycemic index diet on pregnancy outcomes in gestational diabetes  
31 mellitus. *Diabetes Care*. 2011; 34(11): 2341-6.
- 32 51. Moreno-Castilla C, Hernandez M, Bergua M, Alvarez MC, Arce MA, Rodriguez K, et al. Low-  
33 Carbohydrate Diet for the Treatment of Gestational Diabetes Mellitus: A randomized controlled trial.  
34 *Diabetes Care*. 2013; 36(8): 2233-8.
- 35 52. Rae A, Bond D, Evans S, North F, Roberman B, Walters B. A randomised controlled trial of dietary  
36 energy restriction in the management of obese women with gestational diabetes. *Aust N Z J Obstet*  
37 *Gynaecol*; 2000. p. 416-22.
- 38 53. Spaulonci CP, Bernardes LS, Trindade TC, Zugaib M, Francisco RPV. Randomized trial of  
39 metformin vs insulin in the management of gestational diabetes. *Am J Obstet Gynecol*. 2013; 209(1):  
40 34e1-e7.
- 41 54. Rowan JA, Hague WM, Gao W, Battin MR, Moore MP. Metformin versus Insulin for the  
42 Treatment of Gestational Diabetes. *N Engl J Med*. 2008; 358(19): 2003-15.
- 43 55. Niromanesh S, Alavi A, Sharbaf FR, Amjadi N, Moosavi S, Akbari S. Metformin compared with  
44 insulin in the management of gestational diabetes mellitus: A randomized clinical trial. *Diabetes Res*  
45 *Clin Pract*. 2012; 98(3): 422-9.
- 46 56. Moore LE, Briery CM, Clokey D, Martin RW, Williford NJ, Bofill JA, et al. Metformin and insulin in  
47 the management of gestational diabetes mellitus: Preliminary results of a comparison. *J Rep Med*  
48 *Obstet Gynecol*. 2007; 52(11): 1011-5.
- 49 57. Mesdaghinia E, Samimi M, Homaei Z, Saberi F, Moosavi SGA, Yaribakht M. Comparison of  
50 newborn outcomes in women with gestational diabetes mellitus treated with metformin or insulin: a  
51 randomised blinded trial. *Int J Prev Med*. 2013; 4(3): 327-33.
- 52  
53  
54  
55  
56  
57  
58  
59  
60

- 1  
2  
3 58. Ijäs H, Vääräsmäki M, Morin-Papunen L, Keravuo R, Ebeling T, Saarela T, et al. Metformin should  
4 be considered in the treatment of gestational diabetes: a prospective randomised study. *BJOG*;  
5 2010. p. 880-5.
- 6 59. Hague W, Davoren P, Oliver J, Rowan J. Contraindications to use of metformin. Metformin may  
7 be useful in gestational diabetes. *BMJ*. 2003; 326: 762.
- 8 60. Hassan JA, Karim N, Sheikh Z. Metformin prevents macrosomia and neonatal morbidity in  
9 gestational diabetes. *Pak J Med Sci*. 2012; 28(3): 384-9.
- 10 61. Anjalakshi C, Balaji V, Balaji MS, Seshiah V. A prospective study comparing insulin and  
11 glibenclamide in gestational diabetes mellitus in Asian Indian women. *Diabetes Res Clin Pract*. 2007;  
12 76(3): 474-5.
- 13 62. Bertini AM, Silva JC, Taborda W, Becker F, Lemos Bebbber FR, Zucco Viesi JM, et al. Perinatal  
14 outcomes and the use of oral hypoglycemic agents. *J perinat med*; 2005. p. 519-23.
- 15 63. Lain KY, Garabedian MJ, Daftary A, Jeyabalan A. Neonatal adiposity following maternal treatment  
16 of gestational diabetes with glyburide compared with insulin. *Am J Obstet Gynecol*. 2009; 200(5):  
17 501.e1-e6.
- 18 64. Langer O, Conway DL, Berkus MD, Xenakis EM-J, Gonzales O. A Comparison of Glyburide and  
19 Insulin in Women with Gestational Diabetes Mellitus. *N Engl J Med*. 2000; 343(16): 1134-8.
- 20 65. Mukhopadhyay P, Bag TS, Kyal A, Saha DP, Khalid N. Oral hypoglycemic glibenclamide: Can it be a  
21 substitute to insulin in the management of gestational diabetes mellitus? a comparative study. *J*  
22 *South Asian Feder Obstet Gynaec*. 2012; 4(1): 28-31.
- 23 66. Ogunyemi D, Jesse M, Davidson M. Comparison of glyburide versus insulin in management of  
24 gestational diabetes mellitus. *Endo prac*; 2007. p. 427-8.
- 25 67. Silva J, Bertini A, Taborda W, F. B, Bebbber F, Aquim G, et al. Glibenclamide in the Treatment for  
26 Gestational Diabetes Mellitus in a Compared Study to Insulin. *Arq Bras Endocrinol Metab*. 2007;  
27 51(4): 541-6.
- 28 68. Tempe A, Mayanglambam RD. Glyburide as treatment option for gestational diabetes mellitus. *J*  
29 *Obstet Gynaecol Res*. 2013; 39(6): 1147-52.
- 30 69. Moore LE, Clokey D, Rappaport VJ, Curet LB. Metformin compared with glyburide in gestational  
31 diabetes: a randomized controlled trial. *Obst Gynecol*; 2010. p. 55-9.
- 32 70. Silva JC, Pacheco C, Bizato J, Souza BV, Ribeiro TE, Bertini AM. Metformin compared with  
33 glyburide for the management of gestational diabetes. *Int J Gynae Obst*; 2010. p. 37-40.
- 34 71. George A, Mathews JE, Sam D, Beck M, Benjamin SJ, Abraham A, et al. Comparison of neonatal  
35 outcomes in women with gestational diabetes with moderate hyperglycaemia on metformin or  
36 glibenclamide - A randomised controlled trial. *Aust N Z J Obstet Gynaecol*; 2015. p. 47-52.
- 37 72. Lawlor DA. The Society for Social Medicine John Pemberton Lecture 2011. Developmental  
38 overnutrition—an old hypothesis with new importance? *Int J Epidemiol*. 2013; 42 (1): 7-29.
- 39 73. Metzger BE LL, Dyer AR, et al. HAPO Study Cooperative,. Hyperglycemia and Adverse Pregnancy  
40 Outcomes. *N Engl J Med*. 2008; 358: 1991-2002.
- 41 74. Farrar D, Fairley L, Santorelli G, Tuffnell D, Sheldon TA, Wright J, et al. Association between  
42 hyperglycaemia and adverse perinatal outcomes in south Asian and white British women: analysis of  
43 data from the Born in Bradford cohort. *Lancet Diabetes Endocrinol*. 2015; 3(10): 795-804.
- 44 75. World Health Organization. Diagnostic criteria and classification of hyperglycaemia first detected  
45 in pregnancy. Geneva: WHO; 2013.
- 46 76. O'Sullivan JB, Gellis SS, Dandrow RV, Tenney BO. The Potential Diabetic and Her Treatment in  
47 Pregnancy. *Obstet Gynecol*. 1966; 27(5): 683-9.
- 48 77. Silva JC, Fachin DRIRN, Coral ML, Bertini AM. Perinatal impact of the use of metformin and  
49 glyburide for the treatment of gestational diabetes mellitus. *J Perinat Med*. 2012; 40(3): 225-8.
- 50  
51  
52  
53  
54  
55  
56  
57  
58  
59  
60

1  
2  
3  
4  
5  
6  
7  
8  
9  
10  
11  
12  
13  
14  
15  
16  
17  
18  
19  
20  
21  
22  
23  
24  
25  
26  
27  
28  
29  
30  
31  
32  
33  
34  
35  
36  
37  
38  
39  
40  
41  
42  
43  
44  
45  
46  
47  
48  
49  
50  
51  
52  
53  
54  
55  
56  
57  
58  
59  
60

Figure 1: Search process

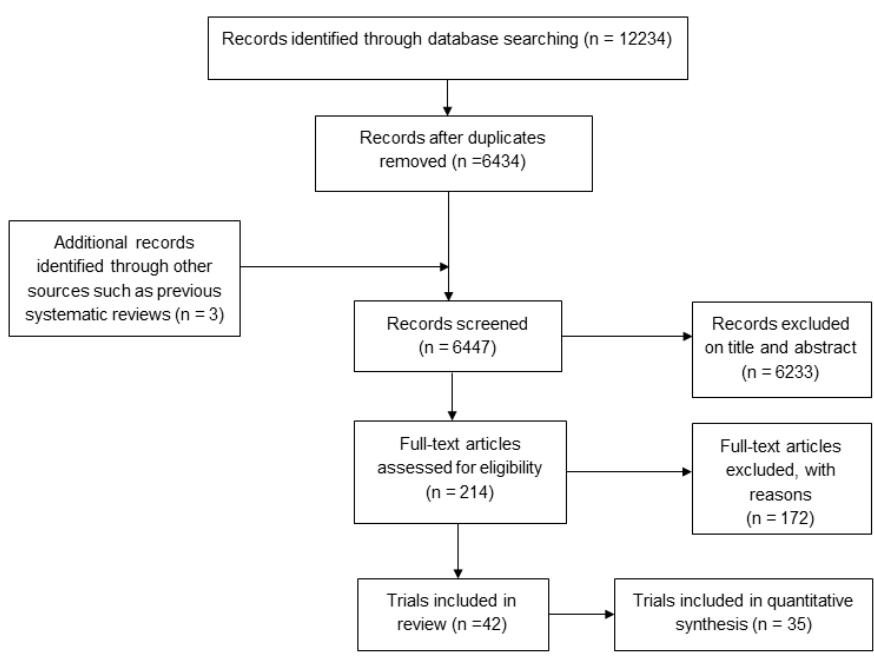

iew only



Figure 2: Forest plots for treatment comparisons and perinatal outcomes

2a: Packages of care (starting with dietary modification) versus routine care: dichotomous and continuous outcomes

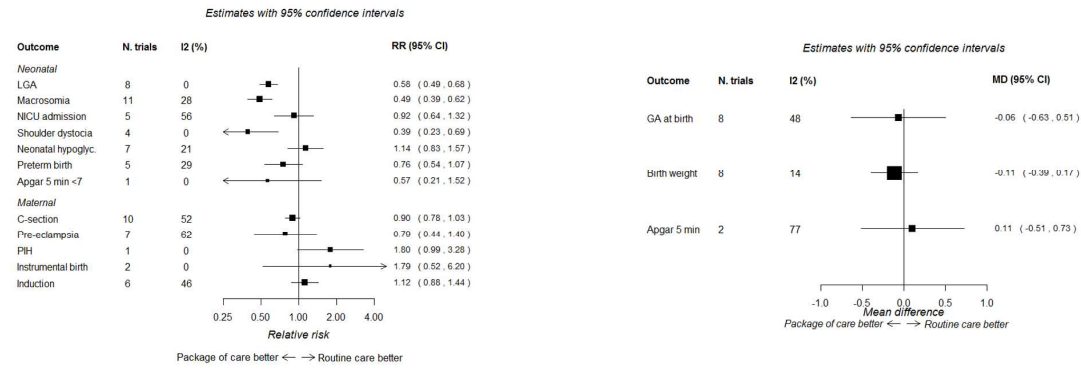

Figure 2b: Metformin versus insulin: dichotomous and continuous outcomes

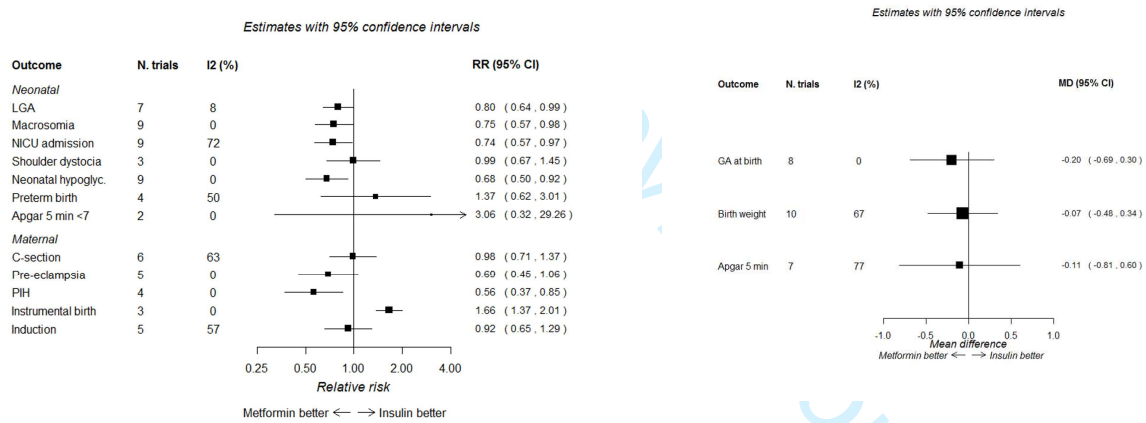

Figure 2c: Glibenclamide versus insulin: dichotomous and continuous outcomes

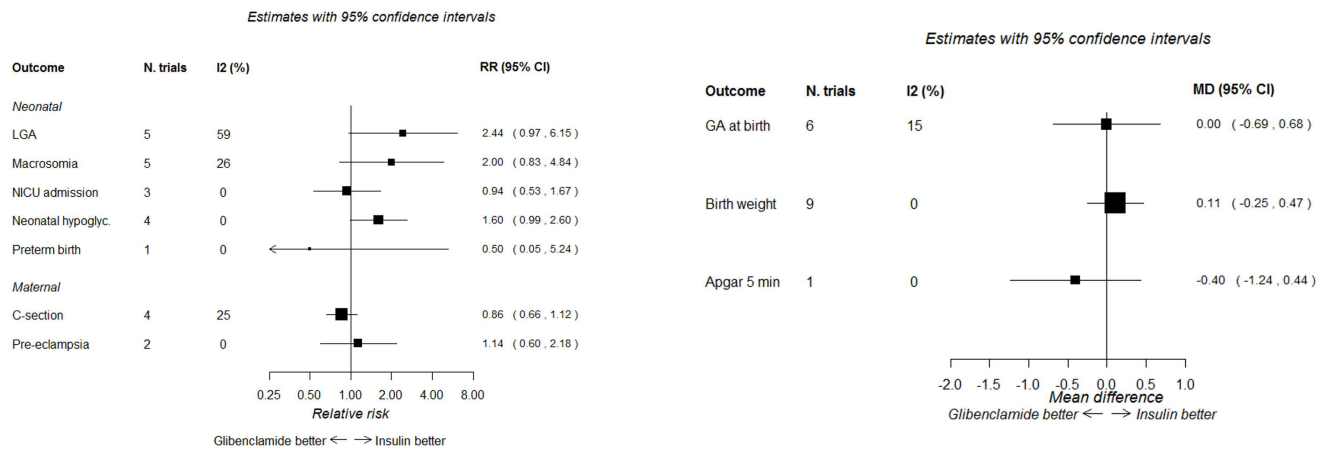

Figure 2d: Glibenclamide versus metformin: dichotomous and continuous outcomes

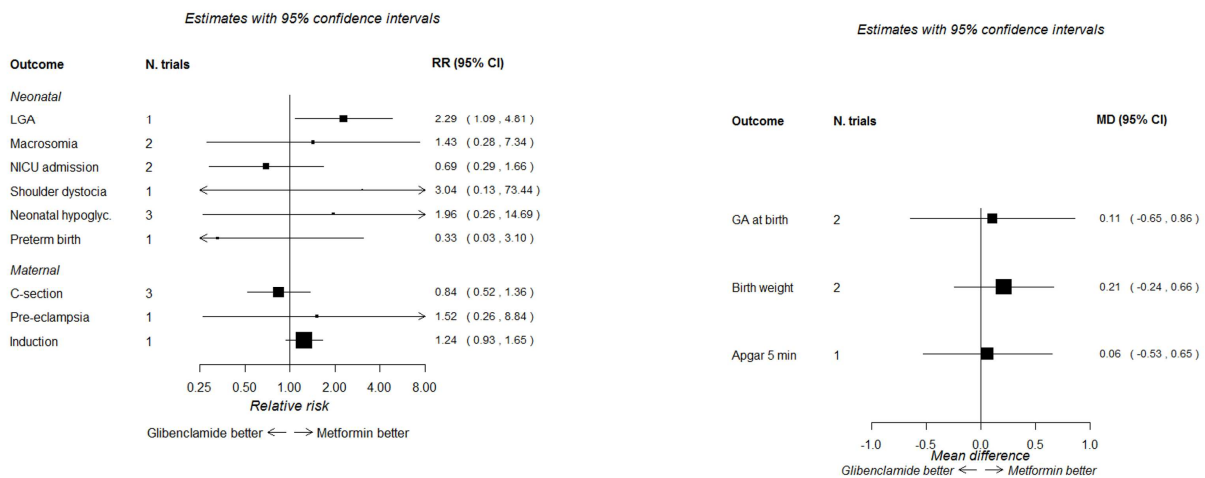

Table 1: Trials comparing a package of care starting with dietary modification to routine care and trials comparing a dietary modification with another dietary modification

| First author                                                                                   | Year | Location | Number | Screening strategy used to determine need for diagnostic test | Diagnostic test and glucose thresholds used to diagnose GDM (mmol/L) | Intervention group                      | Control group | Insulin use in diet group | In meta-analyses | Meta-analysis outcome                                                                                                |
|------------------------------------------------------------------------------------------------|------|----------|--------|---------------------------------------------------------------|----------------------------------------------------------------------|-----------------------------------------|---------------|---------------------------|------------------|----------------------------------------------------------------------------------------------------------------------|
| <i>Trials comparing a package of care (starting with dietary modification) to routine care</i> |      |          |        |                                                               |                                                                      |                                         |               |                           |                  |                                                                                                                      |
| Bevier <sup>39</sup>                                                                           | 1999 | USA      | 103    | 50g OGCT >7.8                                                 | Positive OGCT, negative 100g OGTT, levels not reported               | Dietary counselling and home monitoring | Routine care  | If needed                 | yes              | Apgar 5 min, BW, C-section, GA at birth, induction, instrumental birth, macrosomia, pre-eclampsia, shoulder dystocia |
| Bonomo <sup>40</sup>                                                                           | 2005 | Italy    | 300    | Risk factors and 50g OGCT                                     | Positive OGCT $\geq$ 7.8, negative 100g OGTT 'C&C criteria'          | Dietary advice and monitoring           | Routine care  | Not reported              | yes              | Apgar 5 min, BW, C-section, GA at birth, LGA, macrosomia, NN hypoglycaemia, NICU admission,                          |

1  
2  
3  
4  
5  
6  
7  
8  
9  
10  
11  
12  
13  
14  
15  
16  
17  
18  
19  
20  
21  
22  
23  
24  
25  
26  
27  
28  
29  
30  
31  
32  
33  
34  
35  
36  
37  
38  
39  
40  
41  
42  
43  
44  
45  
46  
47

For peer review only

|                        |      |                |      |                                   |                                                                                    |                                                                        |              |              |     |                                                                                                                                     |
|------------------------|------|----------------|------|-----------------------------------|------------------------------------------------------------------------------------|------------------------------------------------------------------------|--------------|--------------|-----|-------------------------------------------------------------------------------------------------------------------------------------|
| Crowther <sup>41</sup> | 2005 | UK / Australia | 1000 | Risk factors or 50g OGCT          | 75g OGTT fasting <7.8 and 2-hr >7.8 and < 11.1                                     | Individualised dietary advice, monitoring & pharmacological treatments | Routine care | If needed    | yes | Apgar 5 min <7, BW, C-sectionGA at birth, induction, macrosomia, NN hypoglycaemia, NICU admission, pre-eclampsia, shoulder dystocia |
| Deveer <sup>27</sup>   | 2013 | Turkey         | 100  | Universal 50g OGCT >7.8 and <10.0 | Positive OGCT, negative 100g OGTT fasting <5.3 1-hr <10.0, 2-hr <8.8 and 3-hr <7.8 | Calorie diet                                                           | Routine care | Not reported | yes | BW, C-section, gest age at birth, LGA, macrosomia, NICU admission, pre-eclampsia, preterm birth                                     |
| Elnour <sup>42</sup>   | 2006 | UAE            | 180  | Not reported                      | 100g OGTT, 'C&C criteria'                                                          | Diet education, exercise, monitoring & pharmacological treatments      | Routine care | If needed    | yes | C-section, LGA, macrosomia, NN hypoglycaemia, NICU admission, pre-eclampsia, preterm birth, shoulder dystocia                       |

|    |                      |      |        |     |                        |                                                                      |                                                                                                    |              |                                            |     |                                                                                                                                                                        |
|----|----------------------|------|--------|-----|------------------------|----------------------------------------------------------------------|----------------------------------------------------------------------------------------------------|--------------|--------------------------------------------|-----|------------------------------------------------------------------------------------------------------------------------------------------------------------------------|
| 1  |                      |      |        |     |                        |                                                                      |                                                                                                    |              |                                            |     |                                                                                                                                                                        |
| 2  |                      |      |        |     |                        |                                                                      |                                                                                                    |              |                                            |     |                                                                                                                                                                        |
| 3  |                      |      |        |     |                        |                                                                      |                                                                                                    |              |                                            |     |                                                                                                                                                                        |
| 4  |                      |      |        |     |                        |                                                                      |                                                                                                    |              |                                            |     |                                                                                                                                                                        |
| 5  | Fadl <sup>28</sup>   | 2015 | Sweden | 66  | Risk factors           | 75g OGTT <7.0,<br>≥10.0 <12.2                                        | Diet education,<br>exercise,<br>monitoring &<br>pharmacological<br>treatments                      | Routine care | If needed in<br>intervention<br>group only | yes | BW, C-section,<br>LGA, GA at<br>birth,<br>macrosomia,<br>pre-eclampsia,<br>instrumental<br>birth,<br>induction,<br>NICU<br>admission                                   |
| 6  |                      |      |        |     |                        |                                                                      |                                                                                                    |              |                                            |     |                                                                                                                                                                        |
| 7  |                      |      |        |     |                        |                                                                      |                                                                                                    |              |                                            |     |                                                                                                                                                                        |
| 8  |                      |      |        |     |                        |                                                                      |                                                                                                    |              |                                            |     |                                                                                                                                                                        |
| 9  |                      |      |        |     |                        |                                                                      |                                                                                                    |              |                                            |     |                                                                                                                                                                        |
| 10 |                      |      |        |     |                        |                                                                      |                                                                                                    |              |                                            |     |                                                                                                                                                                        |
| 11 |                      |      |        |     |                        |                                                                      |                                                                                                    |              |                                            |     |                                                                                                                                                                        |
| 12 |                      |      |        |     |                        |                                                                      |                                                                                                    |              |                                            |     |                                                                                                                                                                        |
| 13 |                      |      |        |     |                        |                                                                      |                                                                                                    |              |                                            |     |                                                                                                                                                                        |
| 14 |                      |      |        |     |                        |                                                                      |                                                                                                    |              |                                            |     |                                                                                                                                                                        |
| 15 | Garner <sup>43</sup> | 1997 | Canada | 299 | 75g OGCT<br>>8.0       | 75g OGTT<br>fasting >7.5 and<br>2-hr >9.6                            | Dietary<br>counselling,<br>restricted<br>calorie intake,<br>monitoring &<br>insulin if<br>required | Routine care | If needed                                  | yes | BW, C-section,<br>GA at birth,<br>macrosomia,<br>NN<br>hypoglycaemia,<br>pre-eclampsia,<br>preterm birth,<br>shoulder<br>dystocia                                      |
| 16 |                      |      |        |     |                        |                                                                      |                                                                                                    |              |                                            |     |                                                                                                                                                                        |
| 17 |                      |      |        |     |                        |                                                                      |                                                                                                    |              |                                            |     |                                                                                                                                                                        |
| 18 |                      |      |        |     |                        |                                                                      |                                                                                                    |              |                                            |     |                                                                                                                                                                        |
| 19 |                      |      |        |     |                        |                                                                      |                                                                                                    |              |                                            |     |                                                                                                                                                                        |
| 20 |                      |      |        |     |                        |                                                                      |                                                                                                    |              |                                            |     |                                                                                                                                                                        |
| 21 |                      |      |        |     |                        |                                                                      |                                                                                                    |              |                                            |     |                                                                                                                                                                        |
| 22 |                      |      |        |     |                        |                                                                      |                                                                                                    |              |                                            |     |                                                                                                                                                                        |
| 23 |                      |      |        |     |                        |                                                                      |                                                                                                    |              |                                            |     |                                                                                                                                                                        |
| 24 |                      |      |        |     |                        |                                                                      |                                                                                                    |              |                                            |     |                                                                                                                                                                        |
| 25 | Landon <sup>44</sup> | 2009 | USA    | 958 | 50g OGCT<br>>7.5-<11.1 | 100g OGTT<br>fasting <5.3, 2<br>or more 1-hr<br>>8.6 or 2-hr<br>>8.6 | Individualised<br>dietary advice,<br>monitoring &<br>insulin                                       | Routine care | If needed                                  | yes | BW, C-section,<br>GA at birth,<br>induction,<br>macrosomia,<br>NN<br>hypoglycaemia,<br>NICU<br>admission, pre-<br>eclampsia,<br>preterm birth,<br>shoulder<br>dystocia |
| 26 |                      |      |        |     |                        |                                                                      |                                                                                                    |              |                                            |     |                                                                                                                                                                        |
| 27 |                      |      |        |     |                        |                                                                      |                                                                                                    |              |                                            |     |                                                                                                                                                                        |
| 28 |                      |      |        |     |                        |                                                                      |                                                                                                    |              |                                            |     |                                                                                                                                                                        |
| 29 |                      |      |        |     |                        |                                                                      |                                                                                                    |              |                                            |     |                                                                                                                                                                        |
| 30 |                      |      |        |     |                        |                                                                      |                                                                                                    |              |                                            |     |                                                                                                                                                                        |
| 31 |                      |      |        |     |                        |                                                                      |                                                                                                    |              |                                            |     |                                                                                                                                                                        |
| 32 |                      |      |        |     |                        |                                                                      |                                                                                                    |              |                                            |     |                                                                                                                                                                        |
| 33 |                      |      |        |     |                        |                                                                      |                                                                                                    |              |                                            |     |                                                                                                                                                                        |
| 34 |                      |      |        |     |                        |                                                                      |                                                                                                    |              |                                            |     |                                                                                                                                                                        |
| 35 |                      |      |        |     |                        |                                                                      |                                                                                                    |              |                                            |     |                                                                                                                                                                        |
| 36 |                      |      |        |     |                        |                                                                      |                                                                                                    |              |                                            |     |                                                                                                                                                                        |
| 37 |                      |      |        |     |                        |                                                                      |                                                                                                    |              |                                            |     |                                                                                                                                                                        |
| 38 |                      |      |        |     |                        |                                                                      |                                                                                                    |              |                                            |     |                                                                                                                                                                        |
| 39 |                      |      |        |     |                        |                                                                      |                                                                                                    |              |                                            |     |                                                                                                                                                                        |
| 40 |                      |      |        |     |                        |                                                                      |                                                                                                    |              |                                            |     |                                                                                                                                                                        |
| 41 |                      |      |        |     |                        |                                                                      |                                                                                                    |              |                                            |     |                                                                                                                                                                        |
| 42 |                      |      |        |     |                        |                                                                      |                                                                                                    |              |                                            |     |                                                                                                                                                                        |
| 43 |                      |      |        |     |                        |                                                                      |                                                                                                    |              |                                            |     |                                                                                                                                                                        |
| 44 |                      |      |        |     |                        |                                                                      |                                                                                                    |              |                                            |     |                                                                                                                                                                        |
| 45 |                      |      |        |     |                        |                                                                      |                                                                                                    |              |                                            |     |                                                                                                                                                                        |
| 46 |                      |      |        |     |                        |                                                                      |                                                                                                    |              |                                            |     |                                                                                                                                                                        |
| 47 |                      |      |        |     |                        |                                                                      |                                                                                                    |              |                                            |     |                                                                                                                                                                        |

1  
2  
3  
4  
5  
6  
7  
8  
9  
10  
11  
12  
13  
14  
15  
16  
17  
18  
19  
20  
21  
22  
23  
24  
25  
26  
27  
28  
29  
30  
31  
32  
33  
34  
35  
36  
37  
38  
39  
40  
41  
42  
43  
44  
45  
46  
47

|                          |      |           |     |                      |                                                                                                                  |                                                  |                        |                            |     |                                                                                                                           |
|--------------------------|------|-----------|-----|----------------------|------------------------------------------------------------------------------------------------------------------|--------------------------------------------------|------------------------|----------------------------|-----|---------------------------------------------------------------------------------------------------------------------------|
| Li <sup>45</sup>         | 1987 | Hong Kong | 58  | Risk factors         | 100g OGTT, two or more: fasting >5.8, 1 hr >10.6, 2-hr >9.2, 3-hr >8.1, then 75g OGTT fasting <8.0 or 2-hr <11.0 | 30-35g/kg carbohydrate diet and monitoring       | Routine care           | Not reported               | yes | BW, C-section, GA at birth, induction, macrosomia,                                                                        |
| O'Sullivan <sup>76</sup> | 1966 | USA       | 615 | OGCT or risk factors | 100g OGTT two or more fasting > 6.1, or 1-hr > 9.1 or 2-hr > 6.7 or 3-hr >6.1                                    | Low calorie diabetic diet                        | Standard diabetic diet | Only in intervention group | yes | Macrosomia, preterm birth                                                                                                 |
| Yang <sup>29</sup>       | 2003 | China     | 150 | Not reported         | Not reported                                                                                                     | 'intensive' diabetes management                  | Routine care           | If needed                  | yes | C-Section, shoulder dystocia                                                                                              |
| Yang <sup>30</sup>       | 2014 | China     | 700 |                      | 75g OGTT fasting 5.1, 1 hr 10.0, 2 hr 8.5                                                                        | Individual & group dietary/physical intervention | Routine care           | If needed                  | yes | BW, C-section, GA at birth, induction, macrosomia, NN hypoglycaemia, PIH, pre-eclampsia, preterm birth, shoulder dystocia |

***Trials comparing a dietary modification with another dietary modification***

|    |                               |      |           |     |                                                    |                                                                                 |                         |                             |                                                         |    |   |
|----|-------------------------------|------|-----------|-----|----------------------------------------------------|---------------------------------------------------------------------------------|-------------------------|-----------------------------|---------------------------------------------------------|----|---|
| 1  |                               |      |           |     |                                                    |                                                                                 |                         |                             |                                                         |    |   |
| 2  |                               |      |           |     |                                                    |                                                                                 |                         |                             |                                                         |    |   |
| 3  |                               |      |           |     |                                                    |                                                                                 |                         |                             |                                                         |    |   |
| 4  |                               |      |           |     |                                                    |                                                                                 |                         |                             |                                                         |    |   |
| 5  | Asemi <sup>47</sup>           | 2014 | Iran      | 52  | 50g OGCT                                           | OGCT $\geq 7.8$ , 75g OGTT Fasting: $>5.1$ , 1 hr $\geq 10.0$ , 2 hr $\geq 8.5$ | DASH diet <sup>a</sup>  | Control diet                | Women with GDM excluded, therefore insulin not required | no | - |
| 6  |                               |      |           |     |                                                    |                                                                                 |                         |                             |                                                         |    |   |
| 7  |                               |      |           |     |                                                    |                                                                                 |                         |                             |                                                         |    |   |
| 8  |                               |      |           |     |                                                    |                                                                                 |                         |                             |                                                         |    |   |
| 9  |                               |      |           |     |                                                    |                                                                                 |                         |                             |                                                         |    |   |
| 10 |                               |      |           |     |                                                    |                                                                                 |                         |                             |                                                         |    |   |
| 11 |                               |      |           |     |                                                    |                                                                                 |                         |                             |                                                         |    |   |
| 12 | Cypryk <sup>49</sup>          | 2007 | Poland    | 30  | Not reported                                       | levels not reported only that the WHO criteria was used                         | High carbohydrate diet  | Low carbohydrate diet       | If needed                                               | no | - |
| 13 |                               |      |           |     |                                                    |                                                                                 |                         |                             |                                                         |    |   |
| 14 |                               |      |           |     |                                                    |                                                                                 |                         |                             |                                                         |    |   |
| 15 |                               |      |           |     |                                                    |                                                                                 |                         |                             |                                                         |    |   |
| 16 |                               |      |           |     |                                                    |                                                                                 |                         |                             |                                                         |    |   |
| 17 | Louie <sup>50</sup>           | 2011 | Australia | 99  | Not reported                                       | 75g OGTT $\geq 5.5$ , 1-hr $\geq 10.0$ or 2-h $\geq 8.0$                        | Low GI diet             | High fibre moderate GI diet | If needed                                               | no | - |
| 18 |                               |      |           |     |                                                    |                                                                                 |                         |                             |                                                         |    |   |
| 19 |                               |      |           |     |                                                    |                                                                                 |                         |                             |                                                         |    |   |
| 20 |                               |      |           |     |                                                    |                                                                                 |                         |                             |                                                         |    |   |
| 21 | Ma <sup>31</sup>              | 2015 | China     | 83  | 50g OGCT                                           | 75g OGTT $\geq 5.8$ , 1-hr $\geq 10.6$ , 2-h $\geq 9.2$ or 3-hr 8.1             | Low glycaemia load diet | Usual diet                  | If needed <sup>b</sup>                                  | no | - |
| 22 |                               |      |           |     |                                                    |                                                                                 |                         |                             |                                                         |    |   |
| 23 |                               |      |           |     |                                                    |                                                                                 |                         |                             |                                                         |    |   |
| 24 | Moreno-Castilla <sup>51</sup> | 2013 | Spain     | 152 | 50g OGCT $\geq 7.8$                                | 100g OGTT $>5.8$ , 1 hr $>10.6$ , 2-hr $>9.2$ , 3-hr $>8.1$                     | Low carbohydrate diet   | Control diet                | If needed                                               | no | - |
| 25 |                               |      |           |     |                                                    |                                                                                 |                         |                             |                                                         |    |   |
| 26 |                               |      |           |     |                                                    |                                                                                 |                         |                             |                                                         |    |   |
| 27 |                               |      |           |     |                                                    |                                                                                 |                         |                             |                                                         |    |   |
| 28 | Rae <sup>52</sup>             | 2000 | Australia | 124 | Not reported                                       | (glucose load not reported) OGTT fasting $>5.4$ or 2-hour $>7.9$                | Calorie restricted diet | Usual diet                  | If needed                                               | no | - |
| 29 |                               |      |           |     |                                                    |                                                                                 |                         |                             |                                                         |    |   |
| 30 |                               |      |           |     |                                                    |                                                                                 |                         |                             |                                                         |    |   |
| 31 |                               |      |           |     |                                                    |                                                                                 |                         |                             |                                                         |    |   |
| 32 |                               |      |           |     |                                                    |                                                                                 |                         |                             |                                                         |    |   |
| 33 | Yao <sup>32</sup>             | 2015 | China     | 33  | 50g OGCT fasting $\geq 5.8$ 'post-load' $\geq 7.8$ | 100g OGTT fasting $>5.3$ , 1 hr $>10.0$ , 2-hr $>8.6$ , 3-hr $>7.8$             | DASH diet               | Usual diet                  | If needed                                               | no | - |
| 34 |                               |      |           |     |                                                    |                                                                                 |                         |                             |                                                         |    |   |
| 35 |                               |      |           |     |                                                    |                                                                                 |                         |                             |                                                         |    |   |
| 36 |                               |      |           |     |                                                    |                                                                                 |                         |                             |                                                         |    |   |
| 37 |                               |      |           |     |                                                    |                                                                                 |                         |                             |                                                         |    |   |

<sup>a</sup>DASH diet = Dietary Approaches to Stop Hypertension

<sup>b</sup>women who required insulin were excluded from the trial's analyses

Table 2: Trials comparing metformin to insulin

| First author           | Year | Location  | Number | Diagnostic test and glucose thresholds used to diagnose GDM     | Screening strategy <sup>a</sup> | Meta-analysis outcome                                                                                 |
|------------------------|------|-----------|--------|-----------------------------------------------------------------|---------------------------------|-------------------------------------------------------------------------------------------------------|
| Ainuddin <sup>24</sup> | 2014 | Pakistan  | 150    | 75g OGTT two or more; fasting 5.3, 1 hr 10.0, 2 hr 8.6          | 50g OGCT $\geq$ 7.8             | PIH, pre-eclampsia, GA at delivery, induction, C-section, LGA, NICU admission, neonatal hypoglycaemia |
| Hague <sup>59</sup>    | 2003 | Australia | 30     | 75g OGTT fasting >5.5 or 2-hr >8.0                              | Risk factors                    | BW, Pre-eclampsia, GA at birth, induction, C-section, macrosomia, hypoglycaemia                       |
| Hassan <sup>60</sup>   | 2012 | Pakistan  | 150    | 75g OGTT 2 or more levels fasting >5.3, 1-hr >10.0 or 2-hr >8.6 | 50g OGCT $\geq$ 7.8             | Apgar 5 min, GA at birth, induction, C-section, BW, macrosomia, hypoglycaemia, NICU admission         |
| Ijas <sup>58</sup>     | 2010 | Finland   | 100    | 75g OGTT fasting >5.3, 1-hr >11.0 or 2-hr >9.6                  | Risk-based                      | Apgar 5 min, BW, C-section, GA at birth, induction, instrumental birth, LGA,                          |

For peer review only



|    |                           |      |                |     |                                                                              |                              |                                                                                         |
|----|---------------------------|------|----------------|-----|------------------------------------------------------------------------------|------------------------------|-----------------------------------------------------------------------------------------|
| 1  |                           |      |                |     |                                                                              |                              |                                                                                         |
| 2  |                           |      |                |     |                                                                              |                              |                                                                                         |
| 3  |                           |      |                |     |                                                                              |                              |                                                                                         |
| 4  |                           |      |                |     |                                                                              |                              |                                                                                         |
| 5  |                           |      |                |     |                                                                              |                              | macrosomia,                                                                             |
| 6  |                           |      |                |     |                                                                              |                              | hypoglycaemia,                                                                          |
| 7  |                           |      |                |     |                                                                              |                              | NICU admission                                                                          |
| 8  | Mesdaghinia <sup>57</sup> | 2013 | Iran           | 200 | 100g OGTT two or more; fasting >5.3 or 1-hr >10.0 or 2-hr >8.6 or 3-hr >7.8  | 50g OGCT—levels not reported | BW, macrosomia, LGA,                                                                    |
| 9  |                           |      |                |     |                                                                              |                              | hypoglycaemia,                                                                          |
| 10 |                           |      |                |     |                                                                              |                              | NICU admission,                                                                         |
| 11 |                           |      |                |     |                                                                              |                              | shoulder dystocia,                                                                      |
| 12 |                           |      |                |     |                                                                              |                              | 5 min Apgar <7,                                                                         |
| 13 |                           |      |                |     |                                                                              |                              | preterm birth                                                                           |
| 14 |                           |      |                |     |                                                                              |                              |                                                                                         |
| 15 | Moore <sup>56</sup>       | 2007 | USA            | 63  | 100g OGTT two or more; fasting >5.8 or 1-hr >10.5 or 2-hr >9.1 or 3-hr >8.0  | 50g OGCT $\geq$ 7.8          | Apgar 5 min, BW, macrosomia,                                                            |
| 16 |                           |      |                |     |                                                                              |                              | hypoglycaemia,                                                                          |
| 17 |                           |      |                |     |                                                                              |                              | NICU admission                                                                          |
| 18 |                           |      |                |     |                                                                              |                              |                                                                                         |
| 19 | Niromanesh <sup>55</sup>  | 2012 | Iran           | 160 | 100g OGTT two or more fasting >5.3, 1-hr >10.0, 2-hr, 3-hr >8.6 or 3-hr >7.8 | 50g OGCT $\geq$ 7.2          | Apgar 5 min, pre-eclampsia, PIH GA at birth, induction,                                 |
| 20 |                           |      |                |     |                                                                              |                              | C-section,                                                                              |
| 21 |                           |      |                |     |                                                                              |                              | shoulder dystocia,                                                                      |
| 22 |                           |      |                |     |                                                                              |                              | BW macrosomia,                                                                          |
| 23 |                           |      |                |     |                                                                              |                              | LGA, NICU admission,                                                                    |
| 24 |                           |      |                |     |                                                                              |                              | hypoglycaemia,                                                                          |
| 25 |                           |      |                |     |                                                                              |                              | preterm birth                                                                           |
| 26 |                           |      |                |     |                                                                              |                              |                                                                                         |
| 27 |                           |      |                |     |                                                                              |                              |                                                                                         |
| 28 |                           |      |                |     |                                                                              |                              |                                                                                         |
| 29 |                           |      |                |     |                                                                              |                              |                                                                                         |
| 30 | Rowan <sup>54</sup>       | 2008 | Australia / NZ | 751 | 75g OGTT fasting >5.5 or 2-hr >8.0                                           | Risk factors                 | Apgar 5 min <7, BW, GA at birth, LGA, NICU admission, PIH, pre-eclampsia, preterm birth |
| 31 |                           |      |                |     |                                                                              |                              | GA at birth, BW,                                                                        |
| 32 |                           |      |                |     |                                                                              |                              | Apgar 5 min,                                                                            |
| 33 |                           |      |                |     |                                                                              |                              | macrosomia,                                                                             |
| 34 |                           |      |                |     |                                                                              |                              |                                                                                         |
| 35 |                           |      |                |     |                                                                              |                              |                                                                                         |
| 36 | Spaulonci <sup>53</sup>   | 2013 | Brazil         | 94  | 75g or 100g OGTT fasting >5.3 or 1-hr >10.0 or 2-hr >8.0                     | No screening                 | GA at birth, BW,                                                                        |
| 37 |                           |      |                |     |                                                                              |                              | Apgar 5 min,                                                                            |
| 38 |                           |      |                |     |                                                                              |                              | macrosomia,                                                                             |
| 39 |                           |      |                |     |                                                                              |                              |                                                                                         |
| 40 |                           |      |                |     |                                                                              |                              |                                                                                         |
| 41 |                           |      |                |     |                                                                              |                              |                                                                                         |
| 42 |                           |      |                |     |                                                                              |                              |                                                                                         |
| 43 |                           |      |                |     |                                                                              |                              |                                                                                         |
| 44 |                           |      |                |     |                                                                              |                              |                                                                                         |
| 45 |                           |      |                |     |                                                                              |                              |                                                                                         |
| 46 |                           |      |                |     |                                                                              |                              |                                                                                         |
| 47 |                           |      |                |     |                                                                              |                              |                                                                                         |

1  
2  
3  
4  
5  
6  
7  
8  
9  
10  
11  
12  
13  
14  
15  
16  
17  
18  
19  
20  
21  
22  
23  
24  
25  
26  
27  
28  
29  
30  
31  
32  
33  
34  
35  
36  
37  
38  
39  
40  
41  
42  
43  
44  
45  
46  
47

|                      |      |            |     |                                                                                                                        |                           |                                                                                                                                                                                             |
|----------------------|------|------------|-----|------------------------------------------------------------------------------------------------------------------------|---------------------------|---------------------------------------------------------------------------------------------------------------------------------------------------------------------------------------------|
|                      |      |            |     | and two or more<br>fasting >5.3, 1-hr<br>>10.0, 2-hr, 3-hr >8.6<br>or 3-hr >7.8<br>respectively                        |                           | hypoglycaemia,<br>pre-eclampsia,<br>preterm birth, C-<br>section                                                                                                                            |
| Tertti <sup>37</sup> | 2013 | Finland    | 217 | 75g OGTT both<br>criteria: fasting ≥4.8,<br>1-h ≥10.0, 2-h ≥8.7<br>and fasting ≥5.3,<br>≥10.0 and ≥8.6<br>respectively | Risk factors              | GA at birth, BW,<br>Apgar at 5 min,<br>induction,<br>instrumental<br>birth, C-section,<br>LGA, macrosomia,<br>preterm birth,<br>PIH, pre-<br>eclampsia, NICU<br>admission,<br>hypoglycaemia |
| Zinnat <sup>25</sup> | 2013 | Bangladesh | 450 | Not reported <sup>d</sup>                                                                                              | Not reported <sup>d</sup> | Macrosomia,<br>shoulder dystocia,<br>C-section,<br>instrumental birth<br>hypoglycaemia,<br>NICU admission,                                                                                  |

---

<sup>a</sup>It is assumed unless otherwise reported, that the screening strategy advocated by the criteria used was adhered to  
<sup>d</sup>Conference abstract

Table 3: Trials comparing glibenclamide (glyburide) to insulin

| First author               | Year | Location | Number | Diagnostic test and glucose thresholds used to diagnose GDM                    | Screening strategy <sup>a</sup> | Outcome                                                                                   |
|----------------------------|------|----------|--------|--------------------------------------------------------------------------------|---------------------------------|-------------------------------------------------------------------------------------------|
| Anjalakshi <sup>61</sup>   | 2007 | India    | 23     | 75g OGTT 2-hr >7.8                                                             | Universal OGTT                  | BW                                                                                        |
| Bertini <sup>62</sup>      | 2005 | Brazil   | 70     | 75g OGTT fasting >6.1 or 2-hr >7.8                                             | Not reported                    | BW, C-section, Apgar 5 min, GA at birth, LGA                                              |
| Lain <sup>63</sup>         | 2009 | USA      | 99     | 100g OGTT 2 or more: fasting >5.3, 1-hr >8.6 or 2-hr >8.6                      | 50g >7.5                        | BW, GA at birth, LGA, macrosomia                                                          |
| Langer <sup>64</sup>       | 2000 | USA      | 404    | 100g OGTT fasting >5.3-<7.8                                                    | 50g OGCT >7.3                   | BW, C-section, GA at birth, LGA, macrosomia, hypoglycaemia, NICU admission, pre-eclampsia |
| Mirzamoradi <sup>26</sup>  | 2015 | Iran     | 96     | Glucose load not reported; OGTT 2 or more: fasting >5.3, 1-hr >10.0, 2-hr >8.3 | Universal OGTT                  | BW, C-section, GA at birth, NICU admission, hypoglycaemia, pre-eclampsia                  |
| Mukhopadhyay <sup>65</sup> | 2012 | India    | 60     | 75g OGTT 2-hr >7.8                                                             | No screening                    | BW, GA at birth, LGA, hypoglycaemia                                                       |
| Ogunyemi <sup>66</sup>     | 2007 | USA      | 97     | Not reported                                                                   | Not reported                    | BW, C-section, GA at birth, hypoglycaemia,                                                |

1  
2  
3  
4  
5  
6  
7  
8  
9  
10  
11  
12  
13  
14  
15  
16  
17  
18  
19  
20  
21  
22  
23  
24  
25  
26  
27  
28  
29  
30  
31  
32  
33  
34  
35  
36  
37  
38  
39  
40  
41  
42  
43  
44  
45  
46  
47

|                     |      |        |    |                                                                       |               |                                                                                       |
|---------------------|------|--------|----|-----------------------------------------------------------------------|---------------|---------------------------------------------------------------------------------------|
| Silva <sup>67</sup> | 2007 | Brazil | 68 | 75g OGTT fasting >6.1 or 2-hr >7.8                                    | No screening  | BW, C-section, LGA, macrosomia,                                                       |
| Tempe <sup>68</sup> | 2013 | India  | 64 | 100g OGTT 2 or more: fasting >5.3, 1-hr >10.0, 2-hr >8.6 or 3-hr >7.8 | 50g OGCT >7.2 | BW, GA birth, macrosomia, hypoglycaemia, NICU admission, pre-eclampsia, preterm birth |

---

<sup>a</sup>It is assumed unless otherwise reported, that the screening strategy advocated by the criteria used was adhered to

For peer review only

Table 4: Trials comparing glibenclamide to metformin

| First author         | Year | Location | Number | Diagnostic test and thresholds used to diagnose GDM (mmol/L)                   | Screening strategy <sup>a</sup> | Outcome                                                                                                 |
|----------------------|------|----------|--------|--------------------------------------------------------------------------------|---------------------------------|---------------------------------------------------------------------------------------------------------|
| George <sup>71</sup> | 2015 | India    | 159    | 100g OGTT 2 or more; fasting $\geq 5.3$ or 1 hr $\geq 10.0$ or 2-hr $\geq 8.6$ | Not reported                    | BW, GA at birth, macrosomia, hypoglycaemia                                                              |
| Moore <sup>69</sup>  | 2010 | USA      | 149    | 100g OGTT 2 or more; fasting $>5.3$ or 2-hr $>6.7$                             | 50g OGCT $>7.2$                 | BW, C-section, GA at birth, macrosomia, hypoglycaemia, NICU admission, pre-eclampsia, shoulder dystocia |
| Silva <sup>77</sup>  | 2012 | Brazil   | 200    | 75g OGTT fasting $>5.3$ or 1-hr $>10.0$ or 2-hr $>8.0$                         | No screening                    | Apgar 5 min, BW, C-section, GA at birth, LGA, macrosomia, hypoglycaemia, NICU admission                 |

1  
2  
3  
4  
5  
6  
7  
8  
9  
10  
11  
12  
13  
14  
15  
16  
17  
18  
19  
20  
21  
22  
23  
24  
25  
26  
27  
28  
29  
30  
31  
32  
33  
34  
35  
36  
37  
38  
39  
40  
41  
42  
43  
44  
45  
46  
47

Table 5: Estimated probability (%) of a treatment being the most effective in reducing the risk of a dichotomous outcome.

| Outcome                           | Treatment |           |                           |
|-----------------------------------|-----------|-----------|---------------------------|
|                                   | Insulin   | Metformin | Glibenclamide (Glyburide) |
| LGA                               | 7.1       | 92.8      | 0.1                       |
| Macrosomia                        | 5.6       | 94.0      | 0.3                       |
| Neonatal intensive care admission | 0.5       | 61.2      | 38.3                      |
| Neonatal hypoglycaemia            | 3.3       | 96.3      | 0.4                       |
| Caesarean section                 | 10.4      | 9.7       | 79.9                      |
| Pre-eclampsia                     | 4.8       | 84.0      | 11.2                      |

Review only

**Supplementary file 1: Search strategy**

1 exp diabetes, gestational/ (8715)  
2 (gestation\$ adj4 diabet\$).ti,ab. (10162)  
3 gdm.ti,ab. (4203)  
4 (glucose adj4 (pregnan\$ or gestation\$ or prenatal\$ or antenatal\$ or pre-natal\$ or ante-natal\$ or  
5 maternal\$)).ti,ab. (3796)  
6 or/1-4 (15126)  
7 Glucose Intolerance/ (7142)  
8 Glucose Tolerance Test/ (31300)  
9 IGT.ti,ab. (4074)  
10 ((impair\$ or reduced) adj2 glucose).ti,ab. (19442)  
11 (glucose adj (tolerance\$ or intolerance\$)).ti,ab. (40791)  
12 (gtt or ogtt).ti,ab. (7907)  
13 Prediabetic State/ (4763)  
14 (prediabet\$ or pre-diabet\$).ti,ab. (6103)  
15 exp Insulin Resistance/ (64450)  
16 (metabolic syndrome\$ or syndrome\$ x or borderline diabet\$).ti,ab. (37636)  
17 or/6-15 (134039)  
18 exp Pregnancy/ (795751)  
19 (pregnan\$ or gestation\$ or prenatal\$ or antenatal\$ or pre-natal\$ or ante-natal\$ or  
20 maternal\$).ti,ab. (639369)  
21 or/17-18 (1008161)  
22 16 and 19 (10229)  
23 5 or 20 (20405)  
24 randomized controlled trial.pt. (421926)  
25 controlled clinical trial.pt. (91079)  
26 random\$.ti,ab. (841233)  
27 placebo.ti,ab. (176519)  
28 drug therapy.fs. (1876752)  
29 trial.ti,ab. (430134)  
30 groups.ab. (1574965)  
31 or/22-28 (3970247)  
32 21 and 29 (6337)  
33 (2014\$ or 2015\$ or 2016\$).ed,dc,dp,ep,vd,yr. (3346601)  
34 30 and 31 (1671)  
35 animals/ not humans/ (4235813)  
36 32 not 33 (1555)

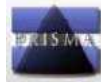

# PRISMA 2009 Checklist

| Section/topic                      | #  | Checklist item                                                                                                                                                                                                                                                                                              | Reported on page # |
|------------------------------------|----|-------------------------------------------------------------------------------------------------------------------------------------------------------------------------------------------------------------------------------------------------------------------------------------------------------------|--------------------|
| <b>TITLE</b>                       |    |                                                                                                                                                                                                                                                                                                             |                    |
| Title                              | 1  | Identify the report as a systematic review, meta-analysis, or both.                                                                                                                                                                                                                                         | 1                  |
| <b>ABSTRACT</b>                    |    |                                                                                                                                                                                                                                                                                                             |                    |
| Structured summary                 | 2  | Provide a structured summary including, as applicable: background; objectives; data sources; study eligibility criteria, participants, and interventions; study appraisal and synthesis methods; results; limitations; conclusions and implications of key findings; systematic review registration number. | 2-3                |
| <b>INTRODUCTION</b>                |    |                                                                                                                                                                                                                                                                                                             |                    |
| Rationale                          | 3  | Describe the rationale for the review in the context of what is already known.                                                                                                                                                                                                                              | 4                  |
| Objectives                         | 4  | Provide an explicit statement of questions being addressed with reference to participants, interventions, comparisons, outcomes, and study design (PICOS).                                                                                                                                                  | 4-5                |
| <b>METHODS</b>                     |    |                                                                                                                                                                                                                                                                                                             |                    |
| Protocol and registration          | 5  | Indicate if a review protocol exists, if and where it can be accessed (e.g., Web address), and, if available, provide registration information including registration number.                                                                                                                               | 2                  |
| Eligibility criteria               | 6  | Specify study characteristics (e.g., PICOS, length of follow-up) and report characteristics (e.g., years considered, language, publication status) used as criteria for eligibility, giving rationale.                                                                                                      | 6                  |
| Information sources                | 7  | Describe all information sources (e.g., databases with dates of coverage, contact with study authors to identify additional studies) in the search and date last searched.                                                                                                                                  | 5                  |
| Search                             | 8  | Present full electronic search strategy for at least one database, including any limits used, such that it could be repeated.                                                                                                                                                                               | 5 & supp file 1    |
| Study selection                    | 9  | State the process for selecting studies (i.e., screening, eligibility, included in systematic review, and, if applicable, included in the meta-analysis).                                                                                                                                                   | 6                  |
| Data collection process            | 10 | Describe method of data extraction from reports (e.g., piloted forms, independently, in duplicate) and any processes for obtaining and confirming data from investigators.                                                                                                                                  | 6                  |
| Data items                         | 11 | List and define all variables for which data were sought (e.g., PICOS, funding sources) and any assumptions and simplifications made.                                                                                                                                                                       | 6                  |
| Risk of bias in individual studies | 12 | Describe methods used for assessing risk of bias of individual studies (including specification of whether this was done at the study or outcome level), and how this information is to be used in any data synthesis.                                                                                      | 6 & supp table 1   |
| Summary measures                   | 13 | State the principal summary measures (e.g., risk ratio, difference in means).                                                                                                                                                                                                                               | 7 - 8              |
| Synthesis of results               | 14 | Describe the methods of handling data and combining results of studies, if done, including measures of consistency (e.g., $I^2$ for each meta-analysis). <a href="http://bmjopen.bmj.com/site/about/guidelines.xhtml">http://bmjopen.bmj.com/site/about/guidelines.xhtml</a>                                | 7 - 8              |



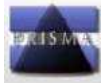

# PRISMA 2009 Checklist

Page 1 of 2

| Section/topic                 | #  | Checklist item                                                                                                                                                                                                                                                                  | Reported on page #      |
|-------------------------------|----|---------------------------------------------------------------------------------------------------------------------------------------------------------------------------------------------------------------------------------------------------------------------------------|-------------------------|
| Risk of bias across studies   | 15 | Specify any assessment of risk of bias that may affect the cumulative evidence (e.g., publication bias, selective reporting within studies).                                                                                                                                    | Sup Table 1             |
| Additional analyses           | 16 | Describe methods of additional analyses (e.g., sensitivity or subgroup analyses, meta-regression), if done, indicating which were pre-specified.                                                                                                                                | -                       |
| <b>RESULTS</b>                |    |                                                                                                                                                                                                                                                                                 |                         |
| Study selection               | 17 | Give numbers of studies screened, assessed for eligibility, and included in the review, with reasons for exclusions at each stage, ideally with a flow diagram.                                                                                                                 | 8, figure 1 and Table 1 |
| Study characteristics         | 18 | For each study, present characteristics for which data were extracted (e.g., study size, PICOS, follow-up period) and provide the citations.                                                                                                                                    | 8 - 9                   |
| Risk of bias within studies   | 19 | Present data on risk of bias of each study and, if available, any outcome level assessment (see item 12).                                                                                                                                                                       | 9 supp Table 1          |
| Results of individual studies | 20 | For all outcomes considered (benefits or harms), present, for each study: (a) simple summary data for each intervention group (b) effect estimates and confidence intervals, ideally with a forest plot.                                                                        | -                       |
| Synthesis of results          | 21 | Present results of each meta-analysis done, including confidence intervals and measures of consistency.                                                                                                                                                                         | 8-13<br>Figures 2-9     |
| Risk of bias across studies   | 22 | Present results of any assessment of risk of bias across studies (see Item 15).                                                                                                                                                                                                 | Supp Table 1            |
| Additional analysis           | 23 | Give results of additional analyses, if done (e.g., sensitivity or subgroup analyses, meta-regression [see Item 16]).                                                                                                                                                           | Table 10                |
| <b>DISCUSSION</b>             |    |                                                                                                                                                                                                                                                                                 |                         |
| Summary of evidence           | 24 | Summarize the main findings including the strength of evidence for each main outcome; consider their relevance to key groups (e.g., healthcare providers, users, and policy makers).                                                                                            | 13-16                   |
| Limitations                   | 25 | Discuss limitations at study and outcome level (e.g., risk of bias), and at review-level (e.g., incomplete retrieval of identified research, reporting bias).                                                                                                                   | 15-16                   |
| Conclusions                   | 26 | Provide a general interpretation of the results in the context of other evidence, and implications for future research.                                                                                                                                                         | 13-15                   |
| <b>FUNDING</b>                |    |                                                                                                                                                                                                                                                                                 |                         |
| Funding                       | 27 | Describe sources of funding for the systematic review and other support (e.g., supply of data); role of funders for the systematic review.<br>Review only - <a href="http://bmjopen.bmj.com/site/about/guidelines.xhtml">http://bmjopen.bmj.com/site/about/guidelines.xhtml</a> | 17                      |

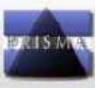

# PRISMA 2009 Checklist

1  
2  
3  
4  
5  
6  
7  
8  
9  
10  
11  
12  
13  
14  
15  
16  
17  
18  
19  
20  
21  
22  
23  
24  
25  
26  
27  
28  
29  
30  
31  
32  
33  
34  
35  
36  
37  
38  
39  
40  
41  
42  
43  
44  
45  
46  
47

*From:* Moher D, Liberati A, Tetzlaff J, Altman DG, The PRISMA Group (2009). Preferred Reporting Items for Systematic Reviews and Meta-Analyses: The PRISMA Statement. PLoS Med 6(6): e1000097. doi:10.1371/journal.pmed1000097

For more information, visit: [www.prisma-statement.org](http://www.prisma-statement.org).

Page 2 of 2

For peer review only

# BMJ Open

## Treatments for gestational diabetes: A systematic review and meta-analysis

|                                 |                                                                                                                                                                                                                                                                                                                                                                                                                                                                                                                  |
|---------------------------------|------------------------------------------------------------------------------------------------------------------------------------------------------------------------------------------------------------------------------------------------------------------------------------------------------------------------------------------------------------------------------------------------------------------------------------------------------------------------------------------------------------------|
| Journal:                        | <i>BMJ Open</i>                                                                                                                                                                                                                                                                                                                                                                                                                                                                                                  |
| Manuscript ID                   | bmjopen-2016-015557.R1                                                                                                                                                                                                                                                                                                                                                                                                                                                                                           |
| Article Type:                   | Research                                                                                                                                                                                                                                                                                                                                                                                                                                                                                                         |
| Date Submitted by the Author:   | 07-Mar-2017                                                                                                                                                                                                                                                                                                                                                                                                                                                                                                      |
| Complete List of Authors:       | farrar, diane; Bradford Institute for Health research, Maternal and Child health<br>Simmonds, Mark; University of York, Centre for Reviews and Dissemination<br>Bryant , Maria ; University of Leeds,<br>Sheldon, Trevor; University of York, health Sciences<br>tuffnell, derek; Bradford Royal Infirmary, Women's and Newborn unit<br>Golder, Su; University of York, Department of Health Sciences<br>Lawlor, Debbie; Department of Social Medicine, University of Bristol, MRC Integrative Epidemiology Unit |
| <b>Primary Subject Heading</b>: | Obstetrics and gynaecology                                                                                                                                                                                                                                                                                                                                                                                                                                                                                       |
| Secondary Subject Heading:      | Diabetes and endocrinology                                                                                                                                                                                                                                                                                                                                                                                                                                                                                       |
| Keywords:                       | gestational diabetes, packages of care, insulin, metformin, glibenclamide, systematic review                                                                                                                                                                                                                                                                                                                                                                                                                     |
|                                 |                                                                                                                                                                                                                                                                                                                                                                                                                                                                                                                  |

SCHOLARONE™  
Manuscripts

only

1  
2  
3 **Treatments for gestational diabetes: A systematic review and meta-analysis**  
4  
5  
6

7 Diane Farrar\*, Bradford Institute for Health Research, Bradford Royal Infirmary and Department of  
8  
9 Health Sciences, University of York  
10

11 Mark Simmonds, Centre for Reviews and Dissemination, University of York

12  
13 Maria Bryant, Leeds Institute of Clinical Trials Research, University of Leeds

14  
15 Trevor A Sheldon, Hull York Medical School, University of York

16  
17 Derek Tuffnell, Bradford Women's and Newborn Unit, Bradford

18  
19 Su Golder, Department of Health Sciences, University of York

20  
21  
22 Debbie A Lawlor, MRC Integrative Epidemiology Unit and School of Social and Community Medicine  
23  
24 at the University of Bristol  
25  
26  
27  
28  
29  
30  
31  
32

33 \*Corresponding author

34  
35 Email: Diane.Farrar@bthft.nhs.uk

36  
37  
38 Tel: 01274 383416  
39  
40  
41  
42  
43  
44

45 Abstract word count: 371

46  
47 Main text word count: 3723

48  
49 Running title: Treatments for gestational diabetes  
50  
51  
52  
53  
54  
55  
56  
57  
58  
59  
60

**Abstract**

**Objective:** To investigate the effectiveness of different treatments for GDM.

**Design:** Systematic review, meta-analysis and network meta-analysis

**Methods:** Data sources were searched up to July 2016 and included: MEDLINE and Embase.

Randomised trials comparing treatments for GDM (packages of care (dietary and lifestyle interventions with pharmacological treatments as required), insulin, metformin, glibenclamide (glyburide)), were selected by two authors and double checked for accuracy. Outcomes included: large for gestational age; shoulder dystocia; neonatal hypoglycaemia; Caesarean section and pre-eclampsia. We pooled data using random-effects meta-analyses and used Bayesian network meta-analysis to compare pharmacological treatments (i.e. including treatments not directly compared within a trial).

**Results:** Forty two trials were included, the reporting of which was generally poor with unclear or high risk of bias. Packages of care varied in their composition and reduced the risk of most adverse perinatal outcomes compared to routine care (e.g. large for gestational age: RR 0.58 (95% CI 0.49-0.68;  $I^2=0\%$ ; trials=8; participants =3462). Network meta-analyses suggest metformin had the highest probability of being the most effective treatment in reducing the risk of most outcomes compared to insulin or glibenclamide.

**Conclusions:** Evidence shows packages of care are effective in reducing the risk of most adverse perinatal outcomes. However trials often include few women, are poorly reported with unclear or high risk of bias and report few outcomes. The contribution of each treatment within the packages of care remains unclear. Large well-designed and conducted trials are urgently needed.

**Systematic Review Registration:** PROSPERO CRD42013004608

1  
2  
3 **Key words:** gestational diabetes; systematic review; meta-analysis; network analysis, treatments;  
4  
5 packages of care; insulin; metformin; glibenclamide (glyburide)  
6  
7

8 **Strengths and limitations of this study:**  
9

10 This systematic review evaluates available interventions for the treatment of gestational  
11  
12 hyperglycaemia and includes a network meta-analysis comparing all pharmacological treatments for  
13  
14 gestational diabetes.  
15

16 A large number of trials conducted in varied populations have been included.  
17

18 For some comparisons the numbers of trials included were few and outcomes reported were few.  
19

20 Trial quality was generally poor with subsequent high or unclear risk of bias.  
21  
22  
23  
24  
25  
26  
27  
28  
29  
30  
31  
32  
33  
34  
35  
36  
37  
38  
39  
40  
41  
42  
43  
44  
45  
46  
47  
48  
49  
50  
51  
52  
53  
54  
55  
56  
57  
58  
59  
60

## Introduction

Treatment of gestational diabetes (GDM) aims to reduce hyperglycaemia and in turn reduce the risk of adverse perinatal outcomes including: large for gestational age (LGA), macrosomia, shoulder dystocia, neonatal hypoglycaemia and the need for Caesarean section. Diet modification is often used as first-line treatment and if partly or wholly unsuccessful, or where women have substantially elevated glucose at diagnosis, pharmacological treatments (metformin, glibenclamide (glyburide) and/or insulin) are offered.

Previous systematic reviews have investigated the effectiveness of treatments for GDM,<sup>1-15</sup> Although results from these reviews generally indicate that treatment reduces the risk of adverse perinatal outcomes, the searches have variable inclusion criteria and were undertaken between 2009<sup>1,5</sup> and 2014<sup>2-4,7,16 11 6,8,10,16</sup> with three reviews with searches in 2015<sup>9,14,15</sup> and since then several trials have been published and recommended criteria for GDM diagnosis has changed. Some reviews have included observational studies and most do not review all treatments, with the exception of the Cochrane treatments review<sup>1</sup> (which is now out of date and has been divided for future updates) and the UK NICE guideline.<sup>16</sup> Consequently most previous reviews do not provide an assessment of all available treatments and most have not used a network meta-analysis to determine the most effective pharmacological treatment across all alternatives included in any randomised trial (RCT).

The aim of this study was to systematically review, and where appropriate pool all results from RCTs of the effect of any treatment on GDM and to determine which treatment is most effective.

## Methods

We conducted a systematic review, meta-analysis and network meta-analysis to evaluate whether treatments for GDM reduce the risks of adverse perinatal outcomes and to compare the effectiveness of these treatments.

1  
2  
3 This review and meta-analysis was conducted in accordance with Cochrane systematic reviews<sup>17</sup> and  
4 the Centre for Reviews and Dissemination recommendations,<sup>18</sup> we have reported our findings  
5 following the PRISMA reporting guidelines (see research checklist).<sup>19</sup> This review forms part of a  
6  
7 larger Health Technology Assessment report of the diagnosis and management of GDM.<sup>20</sup>  
8  
9

#### 10 11 12 13 *Patient involvement*

14  
15 The outcomes we included were from the Cochrane Pregnancy and Childbirth Group's standardised  
16 outcomes for reviews of diabetes in pregnancy. Women who had experienced or had the potential  
17 to experience GDM contribute to the design and appraisal of this group's methods and reviews and  
18 therefore have influenced the design of this review and outcomes examined.<sup>21</sup>  
19  
20  
21  
22  
23

#### 24 25 26 *Search methods*

27  
28 The search strategies were designed to identify records of RCTs of treatment for women with GDM,  
29 added to search sources since the search date (July 2011, trials awaiting classification) of the  
30 Cochrane 'treatments for GDM' review.<sup>1</sup> The bibliographic databases searched were MEDLINE and  
31 MEDLINE in Process, Embase and the Cochrane Central Register of Controlled Trials. Strategies were  
32 not restricted by language and were developed using a combination of subject indexing terms and  
33 free text search terms in the title and abstract fields. Searches were first conducted in September  
34 2013 and updated in October 2014 and 6th July 2016, using the same search strategies. Information  
35 on studies in progress was sought by searching relevant trial registers including ClinicalTrials.gov.  
36  
37  
38  
39  
40  
41  
42  
43  
44  
45

46  
47 We also searched previously published systematic reviews to ensure any eligible RCTs from these  
48 were included in our review if eligible.<sup>2-9</sup> In addition we checked the references of included journal  
49 articles. An example of search terms for MEDLINE are included in Supplementary file 1.  
50  
51  
52  
53  
54  
55  
56  
57  
58  
59  
60



1  
2  
3 *Study selection: Inclusion and exclusion criteria*  
4

5 We included RCTs in which women with diagnosed GDM or impaired glucose tolerance (IGT) (using  
6 any definition) were randomised to a treatment designed to lower blood glucose (pharmacological  
7 or dietary modification) compared to routine antenatal care (however defined by the trial) or  
8 another treatment. Trials including women with pre-existing diabetes were excluded. Trials had to  
9 report effects on adverse perinatal outcomes. Included outcomes (defined in any way by the trials)  
10 were: gestational age at birth; birth weight (BW); macrosomia; large for gestational age (LGA);  
11 shoulder dystocia; preterm birth (less than 37 weeks gestation); neonatal hypoglycaemia; admission  
12 to neonatal intensive care unit (NICU); Caesarean section (elective or emergency); pre-eclampsia;  
13 pregnancy-induced hypertension (PIH); induction of labour; instrumental birth (forceps or ventouse);  
14 Apgar score at five minutes; and negative treatment effects (e.g. gastrointestinal upset, wellbeing).  
15 Data on side effects and quality of life measures were also examined. Conference abstracts and  
16 letters to journals were eligible for inclusion if they reported sufficient outcome data.  
17  
18  
19  
20  
21  
22  
23  
24  
25  
26  
27  
28  
29  
30  
31  
32

33  
34 **Data extraction and risk of bias assessment**  
35

36 Title and abstract screening and then full text screening was performed by two reviewers (DF, MS,  
37 MB or SG) with disagreements resolved by consensus or by the third reviewer. The risk of bias of the  
38 included trials was assessed using the Cochrane risk of bias tool,<sup>22</sup> which considers: sequence  
39 generation, allocation concealment, blinding of participants and medical staff to treatment  
40 allocation, blinding of assessors, loss to follow up, selective reporting of outcomes and other sources  
41 of bias. Each criterion was classified as being at low or high risk of bias, or unclear. Two reviewers  
42 independently assessed all criteria (DF, MS or SG).  
43  
44  
45  
46  
47  
48  
49  
50  
51  
52  
53  
54  
55  
56  
57  
58  
59  
60

### Statistical analysis

Trials were divided into categories according to the included treatments: (1) insulin versus metformin; (2) insulin versus glibenclamide (glyburide); (3) metformin versus glibenclamide; (4) packages of care: diet or dietary advice with or without exercise or glucose monitoring, with or without supplemental metformin, glibenclamide or insulin, compared to routine antenatal care; (5) comparisons of different dietary modifications.

For dichotomous outcomes, the relative risk comparing each group, with its 95% confidence interval, was calculated from the numbers of outcome events in each randomised group and the number randomised to each group. For continuous outcomes, the difference in means between groups was calculated from the mean and standard deviation of the outcome. For each outcome, and within each of the treatment categories, relative risks or differences in means were pooled in random-effects DerSimonian-Laird meta-analyses.<sup>23</sup> Heterogeneity was assessed using  $I^2$ .<sup>24</sup> Analyses were performed to investigate differences in risk of outcomes across varying degrees of hyperglycaemia (defined by a positive/negative GDM screening and diagnostic test). Because of the large number of treatments and outcome comparisons, pooled estimates only are presented in the main paper. Tests for publication bias were considered, but not performed, because there were insufficient trials in any meta-analysis for such tests to be reliable.

We also conducted a network meta-analysis to combine information across multiple treatments simultaneously, this combines direct and indirect data to improve the estimation of the effectiveness of treatments and specifically to try to estimate which is the most effective of a number of different treatment options.<sup>25-28</sup> Analyses were undertaken for each dichotomous outcome using a Bayesian approach, based on the models originally created by Lu and Ades,<sup>29</sup> using the OpenBUGS<sup>30</sup> software. The model has a "Binominal-normal" structure; that is, events were assumed to follow a binomial distribution, with log odds and random effects being normally

1  
2  
3 distributed. Vague normal priors (mean 0, variance 10000) were used except for heterogeneity,  
4  
5 where an inverse-gamma (0.1, 0.1) distribution was used. The model fit and consistency were  
6  
7 assessed by comparing the results to the meta-analyses comparing each treatment directly.  
8  
9

10  
11 Each model generated a comparison between treatments, expressed as an odds ratio, and as a  
12  
13 percentage indicating the probability that the treatment was the best treatment to reduce the  
14  
15 incidence of the adverse outcome. Odds ratios were used to ensure model stability, because log  
16  
17 odds ratios more closely follow a normal distribution than relative risks. The probabilities of being  
18  
19 most effective treatment were calculated from the posterior odds as part of the Bayesian model  
20  
21 developed by Lu and Ades.<sup>29</sup> This approach was not possible for continuously measured outcomes  
22  
23 and so was not undertaken for gestational age, birthweight and Apgar score. As there were no trials  
24  
25 comparing diet modification to pharmacological treatments, diet modification could not be included  
26  
27 in the network meta-analyses.  
28  
29  
30  
31  
32  
33

## 34 **Results**

### 35 *Details of included and excluded trials*

36  
37 12234 citations were identified by the original and the two update searches. These citations were  
38  
39 combined with three additional citations identified by previous systematic reviews conducted prior  
40  
41 to our first searches.<sup>1-5</sup> Following de-duplication and inclusion of additional records, 6437 citations  
42  
43 were reviewed. Of these, 214 were judged potentially eligible based on title and abstract. After  
44  
45 obtaining the full text publications and assessing eligibility, 42 trials were included and 35 of these  
46  
47 were combined in at least one meta-analysis (Figure 1).  
48  
49  
50  
51  
52  
53

54 Having extracted data from the RCTs assessing packages of care and dietary intervention  
55  
56 comparisons (Table 1), we decided that it was not appropriate to pool results from trials comparing  
57  
58  
59  
60

1  
2  
3 dissimilar dietary modification interventions (Table 1). Packages of care included various  
4  
5 combinations of interventions, however all packages of care compared with routine care trial results  
6  
7 were pooled in meta-analyses.  
8  
9

10  
11 We included eight publications not included in any previous published review. One compared  
12 metformin and insulin,<sup>31</sup> one, glibenclamide and insulin,<sup>32</sup> four, packages of care with routine care<sup>33-</sup>  
14  
15 <sup>36</sup> and two compared different dietary modification interventions.<sup>37,38</sup> Six of these trials were  
16  
17 reported after the search dates of the previous reviews and were published in 2014 or 2015, the  
18  
19 remaining two trials (dietary modification interventions or packages of care) did not fulfil other  
20  
21 review's inclusion criteria. Few trials reported side effects or measures of participant satisfaction or  
22  
23 wellbeing.  
24  
25  
26  
27  
28

29 Trials generally included women with GDM diagnosed following a 75g or 100g oral glucose tolerance  
30  
31 test (OGTT) using a variety of international<sup>39,40,41</sup> and locally<sup>42,43</sup> recommended thresholds, though  
32  
33 some included women with 'mild or borderline' GDM (positive oral glucose tolerance test (OGCT),  
34  
35 negative OGTT) and others included women with 'impaired glucose tolerance' (IGT), current  
36  
37 diagnostic criteria<sup>16,44</sup> however may now consider these women as having GDM rather than a  
38  
39 separate and milder condition.  
40  
41  
42  
43  
44

#### 45 *Quality –Risk of bias assessment*

46 Overall, reporting of, and many aspects of trial quality, was poor with the result that risk of bias was  
47  
48 generally unclear or high (Supplementary Table 1). The randomisation procedure and group  
49  
50 allocation was rarely described, although all trials reported that participants were 'randomised'.  
51  
52 Blinding of participants, medical staff and outcome assessors was generally not reported, but as  
53  
54 most trials include some additional intervention above routine care such as diet advice or a  
55  
56 pharmacological treatment, it is probable that participants and most clinicians could not be blinded,  
57  
58  
59  
60

1  
2  
3 though outcome assessment could have been. Most trials had reasonably complete outcome data  
4  
5 and loss to follow-up was low, though for some trials analysis was not conducted on an intention to  
6  
7 treat basis (so the analysis did not include all women randomised). Selective reporting was assessed  
8  
9 as minimal as the majority of trials presented results for all pre-specified outcomes (the possibility  
10  
11 that some trials collected data on outcomes, but did not report them cannot be ruled out however).  
12

13  
14  
15  
16 Generally, women were eligible for inclusion in trials evaluating pharmacological treatments if they  
17  
18 were unable to achieve adequate glycaemic control with dietary and lifestyle management.  
19

20 Therefore there is the possibility that those included may have had more severe or refractory  
21  
22 hyperglycaemia or may adhere less well to lifestyle interventions than those women who did not  
23  
24 require pharmacological treatments to control hyperglycaemia. The specific criteria for the addition  
25  
26 of supplemental insulin in trials were often not reported, though some trials did report that  
27  
28 supplemental insulin was prescribed if 'glycaemic control was not achieved by participants'. It is  
29  
30 probable that thresholds for what is defined as 'good' control differed between trial centres (if  
31  
32 multi-site) and trials.  
33  
34  
35  
36  
37  
38  
39

#### 40 *Packages of care and dietary modification trials*

41  
42 Twelve trials evaluated a package of care (a combination of treatments starting with dietary  
43  
44 modification and/or exercise and/or monitoring and/or supplemental pharmacological treatments)  
45  
46 (Table 1)<sup>33-36,45-52</sup> compared to routine care. Data from these 12 trials are combined in at least one  
47  
48 meta-analysis (Figure 2a, 2b).  
49

50  
51  
52 Seven trials<sup>37,38,53-57</sup> evaluated a variety of dietary modifications and compared them to other dietary  
53  
54 modifications (Table 1). The composition of each dietary modification was generally well reported,  
55  
56 however the interventions and comparisons were too diverse to allow pooling of data. There was no  
57  
58  
59  
60

1  
2  
3 evidence that one type of dietary modification was superior over another, though trials included few  
4  
5 women (Supplementary Figure 1, 2). None of these seven trials reported side effects or quality of life  
6  
7 measures.  
8  
9

10  
11 The composition of the dietary modification was poorly reported in the 'packages of care' trials (the  
12  
13 12 trials included in the meta-analyses). Overall (in all packages of care and dietary modification  
14  
15 trials), 10 out of 19 trials reported that insulin was provided if required, in one trial insulin was only  
16  
17 provided if needed in the intervention group and for the remainder it was unclear or not reported if  
18  
19 supplemental insulin was provided. The screening and diagnostic tests, criteria and glucose  
20  
21 thresholds used to define GDM (and included/exclude women in the trials) varied across the trials  
22  
23 (Table 1). For the meta-analysis the varying forms of dietary modification and/or pharmacological  
24  
25 treatment use was not examined.  
26  
27  
28  
29

30  
31 Packages of care (starting with dietary modification and possibly including monitoring and  
32  
33 pharmacological interventions) reduced the risk of shoulder dystocia by 60%, LGA and macrosomia  
34  
35 by around 50%, pre-eclampsia by 20% and the incidence of Caesarean section by 10% compared to  
36  
37 routine care (Figure 2a) though for pre-eclampsia and Caesarean section the confidence intervals  
38  
39 included the null value. BW was reduced by approximately 110g in the packages of care compared to  
40  
41 routine care group (Figure 2b). The degree of heterogeneity ( $I^2$ ) varied by outcome from 0% to 77%.  
42  
43 No 'packages of care trial' reported side effects; two trials reported quality of life scores<sup>47,48</sup>  
44  
45 indicating higher (better) quality of life scores for women in the intervention compared to the  
46  
47 routine care group.  
48  
49  
50

#### 51 52 *Trials comparing metformin with insulin*

53  
54 Eleven trials compared metformin with Insulin (Table 2).<sup>31,43,58-66</sup> However most trials reported  
55  
56 supplemental insulin use in the metformin group with the exception of two trials.<sup>31,64</sup> The risk of  
57  
58  
59  
60

1  
2  
3 most outcomes, including LGA, macrosomia, NICU admission, neonatal hypoglycaemia, pre-  
4 eclampsia, PIH and induction of labour (IOL), was lower in those randomised to metformin rather  
5 than insulin; instrumental delivery was greater in those randomised to insulin (Figure 2c).  
6  
7 Birthweight, gestational age and Apgar score as continuous measurements did not differ notably  
8 between the two treatments (Figure 2d). Six trials reported the proportion of women with  
9 metformin associated gastrointestinal upset (between 4% to 46%).<sup>58-60,63,65,66</sup> No trial reported  
10 quality of life measures.  
11  
12  
13  
14  
15  
16  
17  
18  
19  
20

#### 21 *Trials comparing glibenclamide (glyburide) with insulin*

22  
23 Nine trials compared glibenclamide with insulin (Table 3).<sup>32,67-74</sup> Figure 2e shows the relative risks of  
24 dichotomous outcomes, suggesting insulin may be relatively more effective than glibenclamide in  
25 reducing the risk of several adverse outcomes, confidence intervals are wide and include the null  
26 value however. There was no difference between insulin and glibenclamide for continuous  
27 outcomes (Figure 2f). One trial reported that glibenclamide was associated with side effects in 3/48  
28 (6%) of women.<sup>72</sup> No trial reported quality of life measures.  
29  
30  
31  
32  
33  
34  
35  
36  
37  
38  
39

#### 40 *Trials comparing glibenclamide (glyburide) with metformin*

41  
42 Only three trials were identified that directly compared glibenclamide with metformin and these  
43 were relatively small trials including between 149 and 200 women (Table 4).<sup>75-77</sup> Figure 2g shows the  
44 risk of dichotomous and Figure 2h continuous outcomes. These suggest metformin is more effective  
45 at reducing risk of LGA and possibly macrosomia. However, for several of the outcomes (for example  
46 LGA) only data from one of these trials is available, it is therefore not possible to make robust  
47 conclusions about the relative benefits of metformin and glibenclamide from these direct  
48 comparisons. No trials reported side effects or quality of life measures.  
49  
50  
51  
52  
53  
54  
55  
56  
57  
58  
59  
60

*Network meta-analysis comparing glibenclamide (glyburide), insulin and metformin*

Figure 3 shows the relationship of treatment comparisons and Table 5 shows the estimated probability of a treatment being the most effective at reducing the risk of each dichotomous outcome. Only dichotomous outcomes reported in at least two glibenclamide trials (either in comparison to insulin or metformin) were included in these analyses to ensure there were sufficient trials (and participants) included. When all three treatments are jointly compared, these analyses suggest that, for all outcomes, with the exception of Caesarean section, metformin is most likely to be the most effective treatment, with its probability of being most effective in reducing risk being 96.3, 94.0%, 92.8%, 84.0% and 61.2% respectively for neonatal hypoglycaemia, macrosomia, LGA, pre-eclampsia and admission to NICU (the probability of being most effective for reducing risk of Caesarean section was 9.7% for metformin, glibenclamide was most likely to be most effective at reducing the risk of Caesarean section (79.9%)). The results of the network meta-analysis (Figure 4) are consistent with the direct comparisons between treatments shown in Figures 2a to 2h, suggesting that metformin is more effective than insulin or glibenclamide at reducing the majority of adverse outcomes. However, many of these comparisons are based on small numbers and have wide confidence intervals that sometimes include the null value.

## **Discussion**

The key finding of our review is that, despite understanding of hyperglycaemia/GDM and its relationship to adverse perinatal outcomes having existed for at least seven decades,<sup>78</sup> and 42 RCTs completed on its treatment; trials are still being conducted that are of limited size and of poor quality (with subsequent unclear or high risk of bias) and therefore which treatment is most effective remains unclear. Given the changing characteristics of the population and the lower fasting diagnostic threshold (compared to previous criteria<sup>40</sup>) recommended by the IADPSG<sup>44</sup> and UK NICE,<sup>16</sup> it is important to understand how treatments affect outcomes for these women. Trials do not always report GDM diagnostic criteria clearly and this is important considering the potential influence on



1  
2  
3 GDM population size and the magnitude of effect.<sup>16,44</sup> Our detailed review, including only evidence  
4  
5 from RCTs, provides some support for a 'step up approach' in the treatment of hyperglycaemia, from  
6  
7 dietary interventions, through addition of metformin (in preference to glibenclamide (glyburide))  
8  
9 through to addition of insulin. Considering that hyperglycaemia in pregnancy has various causes and  
10  
11 many women will be treated successfully with diet and lifestyle interventions (because lower  
12  
13 thresholds lead to less severe hyperglycaemia being classified as GDM) using an integrated  
14  
15 individual approach to its management, is likely to work best, though trials and reviews continue to  
16  
17 be conducted that pay little attention to the influence of non-pharmacological treatments for GDM  
18  
19 and often do not provide information on the severity of hyperglycaemia in treatment groups.  
20  
21 We have taken a pragmatic approach to evaluating the many trials examining treatment packages of  
22  
23 care for women diagnosed with hyperglycaemia/GDM so that our results will be generalisable to  
24  
25 most clinical situations. Several previous reviews have focused exclusively on pharmacological  
26  
27 treatments,<sup>2,6,8,9,12-15</sup> however others have also suggested packages of care with a 'step up' approach  
28  
29 are most effective.<sup>1,3-5</sup> The severity of hyperglycaemia may influence the effectiveness of a  
30  
31 treatment, however many trials do not report treatment subgroup baseline glycaemic levels (for  
32  
33 example diet only, diet and metformin or insulin, or metformin with supplementary insulin).<sup>34-</sup>  
34  
35  
36  
37  
38  
39  
40  
41  
42  
43  
44  
45  
46  
47  
48  
49  
50  
51  
52  
53  
54  
55  
56  
57  
58  
59  
60

<sup>36,45,47,48,51,62-65,79</sup> For those trials reporting baseline glycaemic levels by treatment subgroup there is  
inconsistency, with some reporting significant differences between groups<sup>59,66</sup> and others reporting  
no difference.<sup>43,58,60</sup> Understanding of treatment effects would be improved if baseline OGTT levels  
were presented by treatment subgroup in future trials.

The number of trials and women included in previous reviews varies. One recent review had broadly  
similar inclusion criteria to ours, comparing any package of care for the treatment of GDM with no  
treatment (routine care) and included five trials with 2643 women.<sup>3</sup> Our review includes all these  
trials, plus a further seven (included in the meta-analysis) increasing the number of women to 4512  
and indicating that RCTs in this area continue to be conducted, but not with the size or quality that

1  
2  
3 allows us to have a robust evidence base for the treatment of GDM in a contemporary population.  
4  
5 Pooled estimates are generally consistent across reviews of packages of care irrespective of the  
6  
7 number of trials included, because estimates are driven in all reviews by the two largest, which are  
8  
9 also the highest quality trials, however these trials were conducted in populations using diagnostic  
10  
11 criteria that would provide populations with more severe hyperglycaemia (and therefore the  
12  
13 potential for a larger effect size).<sup>47,50</sup> For example, our analysis shows the risk of macrosomia is  
14  
15 halved when a package of care is provided compared to routine care (11 trials, RR 0.49, 95% CI 0.39-  
16  
17 0.62), confirming estimates from the most recent previous review (RR 0.50 95% CI 0.35-0.71).<sup>3</sup> These  
18  
19 two large and well-conducted RCTs were published in 2005 and 2009,<sup>47,50</sup> and since then several  
20  
21 smaller and poorer quality trials have been published. These two previous large well-conducted  
22  
23 trials cannot provide precise estimates of effect on the wider range of adverse outcomes and for  
24  
25 women diagnosed using more recently recommended criteria. Hence, we feel it is important to place  
26  
27 a moratorium on further small RCTs in this area and that funders should consider commissioning a  
28  
29 multi-centre large-scale RCT with adequate power to determine the effect and cost-effectiveness of  
30  
31 different packages of care on adverse outcomes in women with GDM.  
32  
33  
34  
35  
36  
37  
38

39 The evidence to support metformin use, though encouraging has certain weaknesses. Firstly  
40  
41 although there is a general 'trend' in favour of metformin use over insulin and glibenclamide  
42  
43 (glyburide), confidence intervals are wide, in both the direct and network meta-analysis comparing  
44  
45 each two-way treatment effect. Secondly the reporting of trial methods was generally poor with  
46  
47 'unclear or high risk of bias' and many trials included relatively few women and reported few  
48  
49 outcomes. Thirdly, in most trials directly comparing metformin with insulin, women receiving  
50  
51 metformin were also given supplemental insulin 'if required'; in one of the largest trials this equated  
52  
53 to 46% of the metformin group.<sup>59</sup> Therefore our results more appropriately relate to metformin's  
54  
55 greater effectiveness as a first-line treatment for GDM rather than a standalone treatment  
56  
57 compared to insulin.  
58  
59  
60

1  
2  
3  
4  
5 In addition to being an effective first-line pharmacological treatment for GDM, metformin may also  
6  
7 be preferred by women as it is administered orally and can be stored at room temperature,  
8  
9 compared to insulin that requires subcutaneous injection and refrigerated storage. Metformin is  
10  
11 sometimes associated with gastrointestinal upset, which may affect compliance and quality of life.  
12  
13

14  
15  
16 Few trials have reported side effects or measures of participant satisfaction or wellbeing, all  
17  
18 important outcomes that have the potential to impact health and therefore should be evaluated.  
19  
20 Recent guidance<sup>16,44</sup> recommends lower glucose thresholds compared to those previously  
21  
22 recommended to diagnose GDM<sup>39,40</sup> (and used in the included trials). Therefore it is possible that a  
23  
24 greater proportion of women diagnosed with GDM will require only diet modification or less  
25  
26 'intensive' management compared to those previously diagnosed with GDM, because their  
27  
28 hyperglycaemia is less severe. There is a continuum of increasing risk of adverse outcomes across  
29  
30 the spectrum of glucose however<sup>80,81</sup> therefore interventions to reduce hyperglycaemia even at  
31  
32 lower glucose levels are likely to improve outcomes, but this needs confirming by large well-  
33  
34 designed RCTs.  
35  
36  
37  
38  
39

#### 40 *Strengths and limitations*

41  
42 This systematic review and meta-analysis includes a large number of trials with varied populations,  
43  
44 and examines the effectiveness of treatment packages and diets as well as individual  
45  
46 pharmacological treatments for reducing the risk of adverse perinatal outcomes.  
47  
48  
49

50  
51 For some comparisons, trials and numbers of women were few, as were outcomes reported. Trial  
52  
53 quality was generally poor with subsequent high or unclear risk of bias. GDM diagnostic criteria  
54  
55 varied across trials and recently recommended thresholds are lower now compared to when most  
56  
57 included trials were conducted.  
58  
59  
60

1  
2  
3 Lower glucose threshold criteria recommended by the International Association of Diabetes and  
4 Pregnancy Study Groups<sup>44</sup> and subsequently endorsed by the World Health Organization<sup>82</sup> aim to  
5 identify offspring at risk of obesity through its association with LGA (birth weight >90th percentile),  
6 cord C-peptide >90th percentile and percentage body fat >90th percentile. However there are no  
7 trials that have used these criteria and the classification of less severe hyperglycaemia when lower  
8 glucose thresholds are used to diagnose GDM may reduce the magnitude of the effect of  
9 interventions, compared to those reported by earlier trials using higher glucose thresholds. There  
10 has also been no longer-term follow up conducted to evaluate the treatment of GDM and the effects  
11 on risk of offspring. Importantly, few of the trials that we reviewed had reported side effects or  
12 measures of participant satisfaction or wellbeing.  
13  
14  
15  
16  
17  
18  
19  
20  
21  
22  
23  
24  
25  
26

### 27 *Implications for practice*

28  
29 This review provides reassurance that a package of care where a 'step up' approach of firstly  
30 providing dietary and lifestyle advice, then adding supplementary metformin or insulin if glucose  
31 levels are not adequately controlled, is a reasonable and effective approach compared to providing  
32 just routine antenatal care, particularly with regards to reducing the risk of LGA. However, it has also  
33 highlighted the general poor quality of recent small RCTs that do not improve the evidence base, but  
34 subject women with GDM to unnecessary 'experimentation' and are a cost to society.  
35  
36  
37  
38  
39  
40  
41  
42

43 Metformin seems to be an effective alternative to insulin, if diet modification inadequately controls  
44 hyperglycaemia, however supplemental insulin may be required in up to 50% of women.<sup>59</sup> There is a  
45 need to cease further small RCTs in this area and conduct large well-designed RCTs that clarify the  
46 most effective treatment across a range of outcomes, including those that are likely to be important  
47 to women such as quality of life measurements and those identified by the Cochrane Pregnancy and  
48 Childbirth Group (CPCG) as being essential for trials and reviews of diabetes in pregnancy. These  
49  
50  
51  
52  
53  
54  
55  
56  
57  
58  
59  
60

1  
2  
3 should be incorporated into current diagnostic criteria and ideally look at longer-term outcomes in  
4  
5 mothers and offspring.  
6  
7

### 8 9 **Acknowledgements**

10  
11 Thank you to Julie Glanville and Mick Arber of the York Health Economics Consortium, University of  
12  
13 York, UK, who carried out the searches.  
14  
15

### 16 17 18 **Details of ethics approval**

19  
20 This study did not require ethical approval as the data used have been published previously, and  
21  
22 hence are already in the public domain.  
23  
24

### 25 26 27 **Contribution to authorship**

28  
29 DF, MS, DAL and TAS designed the study. MS wrote the statistical analysis plan. DF monitored the  
30  
31 review process. DF, MS, MB, DAL, TAS, DT and FD interpreted the data, DF, MS, MB and SG assessed  
32  
33 studies for inclusion. MS cleaned and analysed the data, DF wrote the draft paper. All authors have  
34  
35 approved the final version. Diane Farrar is guarantor and takes responsibility for the content of this  
36  
37 article.  
38  
39

### 40 41 42 **Funding**

43  
44 This work was supported by the National Institute for Health Research (NIHR), Health Technology  
45  
46 Assessment (HTA) programme, project number 11/99/02. DF holds a NIHR Post-doctoral Research  
47  
48 Fellowship award (PD-2014-07-019). DAL works in a Unit that is supported by the University of  
49  
50 Bristol and UK Medical Research Council ((MC\_UU\_12013/5) and she holds a NIHR Senior  
51  
52 Investigator award (NF-SI-0611-10196).The views and opinions expressed therein are those of the  
53  
54 authors and do not necessarily reflect those of the HTA, NIHR, MRC, UK National Health Service  
55  
56 (NHS) or the Department of Health.  
57  
58  
59  
60

**Data sharing**

Extracted data are available upon request to the corresponding author

**Competing interests:** All authors have completed the ICMJE uniform disclosure form at [www.icmje.org/coi\\_disclosure.pdf](http://www.icmje.org/coi_disclosure.pdf) and declare: no support from any organisation for the submitted work; no financial relationships with any organisations that might have an interest in the submitted work in the previous three years; no other relationships or activities that could appear to have influenced the submitted work.

For peer review only

## References

1. Alwan N, Tuffnell D, West J. Treatments for gestational diabetes. *Cochrane Database of Syst Rev*. 2009; Issue 3:CD003395.
2. Gui J, Liu Q, Feng L. Metformin vs insulin in the management of gestational diabetes: a meta-analysis. *PLoS one*. 2013; 8(5): e64585.
3. Hartling L, Dryden DM, Guthrie A, Muise M, Vandermeer B, Donovan L. Benefits and harms of treating gestational diabetes mellitus: a systematic review and meta-analysis for the U.S. Preventive Services Task Force and the National Institutes of Health Office of Medical Applications of Research. *Ann Intern Med*. 2013; 159(2): 123-9.
4. Falavigna M, Prestes I, Schmidt MI, Duncan BB, Colagiuri S, Roglic G. Impact of gestational diabetes mellitus screening strategies on perinatal outcomes: a simulation study. *Diabetes Res Clin Pract*. 2012; 99(3): 358-65.
5. Horvath K, Koch K, Jeitler K, Matyas E, Ralf Bender R, Hilda Bastian H, et al. Effects of treatment in women with gestational diabetes mellitus: systematic review and meta-analysis. *BMJ*. 2010; 340: 1395-413.
6. Balsells M, García-Patterson A, Solà I, Roqué M, Gich I, Corcoy R. Glibenclamide, metformin, and insulin for the treatment of gestational diabetes: a systematic review and meta-analysis. *BMJ [Journal Article]* 2015 2015-01-21 16:06:23 [cited 350; Available from: <http://www.bmj.com/bmj/350/bmj.h102.full.pdf>
7. Han S, Crowther CA, Middleton P, Heatley E. Different types of dietary advice for women with gestational diabetes mellitus. *Cochrane Database Syst Rev*. 2013; (3).
8. Jiang Y-F, Chen X-Y, Ding T, Wang X-F, Zhu Z-N, Su S-W. Comparative efficacy and safety of OADs in management of GDM: network meta-analysis of randomized controlled trials. *J Clin Endocrinol Metab*. 2015; 100(5): 2071-80.
9. Amin M, Suksomboon N, Poolsup N, Malik O. Comparison of glyburide with metformin in treating gestational diabetes mellitus: a systematic review and meta-analysis. *Clin Drug Investig*. 2015; 35(6): 343-51.
10. Kitwitee P, Limwattananon S, Limwattananon C, Waleekachonlert O, Ratanachotpanich T, Phimphilai M, et al. Metformin for the treatment of gestational diabetes: An updated meta-analysis. *Diabetes Res Clin Pract*. 2015; 109(3): 521-32.
11. Zhao L-P, Sheng X-Y, Zhou S, Yang T, Ma L-Y, Zhou Y, et al. Metformin versus insulin for gestational diabetes mellitus: a meta-analysis. *Br J Clin Pharmacol*. 2015; 80(5): 1224-34.
12. Su DF, Wang XY. Metformin vs insulin in the management of gestational diabetes: A systematic review and meta-analysis. *Diabetes Res Clin Pract*. 2014; 104(3): 353-7.
13. Zhu B, Zhang L, Fan YY, Wang L, Li XG, Liu T, et al. Metformin versus insulin in gestational diabetes mellitus: a meta-analysis of randomized clinical trials. *Ir J Med Sci*. 2016; 185(2): 371-81.
14. Feng Y, Yang H. Metformin – a potentially effective drug for gestational diabetes mellitus: a systematic review and meta-analysis. *J Matern Fetal Neonatal Med*. 2016; <http://dx.doi.org/10.1080/14767058.2016.1228061>: 1-8.
15. Butalia S, Gutierrez L, Lodha A, Aitken E, Zakariassen A, Donovan L. Short- and long-term outcomes of metformin compared with insulin alone in pregnancy: a systematic review and meta-analysis. *Diabetic Med*. 2017; 34(1): 27-36.
16. National Institute for Health and Care Excellence. Diabetes in pregnancy: management of diabetes and its complications from preconception to the postnatal period. *National collaborating centre for Women's and Children's Health*. 2015; <https://www.nice.org.uk/guidance/ng3>.
17. Higgins JPT, Green S, editors. Cochrane Handbook for Systematic Reviews of Interventions Version 5.1.0 [updated March 2011]. *The Cochrane Collaboration*. 2011; Available from [www.cochrane-handbook.org](http://www.cochrane-handbook.org).
18. Centre for Reviews and Dissemination. Systematic reviews: CRD's guidance for undertaking a systematic review York: CRD, University of York

- 2009.
19. Preferred Reporting Items for Systematic Reviews and Meta-Analyses. PRISMA. <http://wwwprisma-statement.org/>. <http://www.prisma-statement.org/>.
20. Farrar D, Simmonds M, Griffin S, Duarte A, Lawlor DA, Sculpher M, et al. The identification and treatment of women with hyperglycaemia in pregnancy: an analysis of individual participant data, systematic reviews and an economic evaluation. *HTA*. 2013; 20(86).
21. Sakala C, Gyte G, Henderson S, Neilson JP, Horey D. Consumer-Professional Partnership to Improve Research: The Experience of the Cochrane Collaboration's Pregnancy and Childbirth Group. *Birth*. 2001; 28(2): 133-7.
22. The Cochrane Collaboration. The Cochrane Collaboration's tool for assessing risk of bias. <http://ohqcochraneorg/sites/ohqcochraneorg/files/uploads/Risk%20of%20bias%20assessment%20toolpdf>. last accessed Jan 2014.
23. DerSimonian R, Laird N. Meta-analysis in clinical trials. *Control Clin Trials*. 1986; 7(3): 177-88.
24. Higgins JPT, Thompson SG. Quantifying heterogeneity in a meta-analysis. *Stats Med*. 2002; 21(11): 1539-58.
25. Bafeta A, Trinquart L, Seror R, Ravaud P. Reporting of results from network meta-analyses: methodological systematic review. *BMJ*. 2014; 348.
26. Lumley T. Network meta-analysis for indirect treatment comparisons. *Stat Med*. 2002; 21(16): 2313-24.
27. Song F, Altman DG, Glenny A-M, Deeks JJ. Validity of indirect comparison for estimating efficacy of competing interventions: empirical evidence from published meta-analyses. *BMJ*. 2003; 326(7387): 472.
28. Mills EJ, Thorlund K, Ioannidis JP. Demystifying trial networks and network meta-analysis. *BMJ*. 2013; 346(f2914).
29. Lu G, Ades AE. Combination of direct and indirect evidence in mixed treatment comparisons. *Stat Med*. 2004; 23(20): 3105-24.
30. openbugs. <http://www.openbugs.net/w/FrontPage>. last accessed January 2015.
31. Zinnat ANS, Shareen S, Rahman S. Can metformin be used in place of insulin for the treatment of GDM for low resource countries? *BJOG*. 2013; 120: 35.
32. Mirzamoradi M, Bakhtiyari M, Kimiaee P, Hosseini-Najarkolaei A, Mansournia MA. Investigating the effects of treatment based on single high blood glucose in gestational diabetes screening on maternal and neonatal complications. *Arch Gynecol Obst*; 2015. p. 687-95.
33. Deveer R, Deveer M, Akbaba E, Engin-Ustun Y, Aydogan P, Celikkaya H, et al. The effect of diet on pregnancy outcomes among pregnant with abnormal glucose challenge test. *Eur Rev Med Pharmacol Sci*. 2013; 17(9): 1258-61.
34. Fadl HE, Gardefors S, Hjertberg R, Nord E, Persson B, Schwarcz E, et al. Randomized controlled study in pregnancy on treatment of marked hyperglycemia that is short of overt diabetes. *Acta Obstet Gynecol Scand*. 2015; 94(11): 1181-7.
35. Yang X, Hsu-Hage B, Dong L, Shao P, Wang H, Tian H, et al. Intensive Diabetes Management May Improve Pregnancy. *Diabetes Care*. 2003; 26(1): 254.
36. Yang X, Tian H, Zhang F, Zhang C, Li Y, Leng J, et al. A randomised translational trial of lifestyle intervention using a 3-tier shared care approach on pregnancy outcomes in Chinese women with gestational diabetes mellitus but without diabetes. *J Transl Med*. 2014; (1).
37. Ma W-J, Huang Z-H, Huang B-X, Qi B-H, Zhang Y-J, Xiao B-X, et al. Intensive low-glycaemic-load dietary intervention for the management of glycaemia and serum lipids among women with gestational diabetes: a randomized control trial. *Public Health Nutr*. 2015; 18(8): 1506-13.
38. Yao J, Cong L, Zhu B, Wang T. Effect of dietary approaches to stop hypertension diet plan on pregnancy outcome patients with gestational diabetes mellitus. *Bangladesh J Pharmacol*. 2015; 10(4): 732-8.
39. American College of Obstetricians and Gynecologists. Practice Bulletin Clinical Management Guidelines for Obstetricians - Gynecologists. *Obstet Gynecol*. 2013; 122(2): 406- 16.



- 1  
2  
3 40. World Health Organization. Definition, diagnosis and classification of diabetes mellitus and its  
4 complications. Report of a WHO consultation. Part 1: diagnosis and classification of diabetes  
5 mellitus. 1999; [http://apps.who.int/iris/bitstream/10665/66040/1/WHO\\_NCD\\_NCS\\_99.2.pdf](http://apps.who.int/iris/bitstream/10665/66040/1/WHO_NCD_NCS_99.2.pdf).  
6  
7 41. American Diabetes Association. Standards of Medical Care in Diabetes - 2014. *Diabetes Care*  
8 2014; 37(Supp 1): S14-80.  
9  
10 42. Ijäs H, Vääräsmäki M, Morin-Papunen L, Keravuo R, Ebeling T, Saarela T, et al. Metformin should  
11 be considered in the treatment of gestational diabetes: a prospective randomised study. *BJOG*.  
12 2011; 118(7): 880-5.  
13  
14 43. Tertti K, Ekblad U, Koskinen P, Vahlberg T, Ronnema T. Metformin vs. insulin in gestational  
15 diabetes. A randomized study characterizing metformin patients needing additional insulin. *Diabetes*  
16 *Obes Metab*. 2013; 15(3): 246-51.  
17  
18 44. International Association of Diabetes and Pregnancy Study Groups Consensus panel.  
19 International Association of Diabetes and Pregnancy Study Groups Recommendations on the  
20 Diagnosis and Classification of Hyperglycemia in Pregnancy. *Diabetes Care*. 2010; 33(7): 676-82.  
21  
22 45. Bevier WC, Fischer R, Jovanovic L. Treatment of women with an abnormal glucose challenge test  
23 (but a normal oral glucose tolerance test) decreases the prevalence of macrosomia. *Am J Perinatol*;  
24 1999. p. 269-75.  
25  
26 46. Bonomo M, Corica D, Mion E, Goncalves D, Motta G, Merati R, et al. Evaluating the therapeutic  
27 approach in pregnancies complicated by borderline glucose intolerance: a randomized clinical trial.  
28 *Diabet Med*. 2005; 22(11): 1536-41.  
29  
30 47. Crowther CA, Hiller JE, Moss JR, McPhee AJ, Jeffries WS, Robinson JS. Effect of treatment of  
31 gestational diabetes mellitus on pregnancy outcomes. *N Engl J Med*. 2005; 352(24): 2477-86.  
32  
33 48. Elnour AA, Mugammar IT, Jaber T, Revel T, McElnay JC. Pharmaceutical care of patients with  
34 gestational diabetes mellitus. *J evaluat clin prac*; 2008. p. 131-40.  
35  
36 49. Garner P, Okun N, Keely E, Wells G, Perkins S, Sylvain J, et al. A randomized controlled trial of  
37 strict glycemic control and tertiary level obstetric care versus routine obstetric care in the  
38 management of gestational diabetes: A pilot study. *Am J Obstet Gynecol*. 1997; 177(1): 190-5.  
39  
40 50. Landon MB, Spong CY, Thom E, Carpenter MW, Ramin SM, Casey B, et al. A multicenter,  
41 randomized trial of treatment for mild gestational diabetes. *N Engl J Med*. 2009; 361: 1339-48.  
42  
43 51. Li DF, Wong VC, O'Hoy KM, Yeung CY, Ma HK. Is treatment needed for mild impairment of  
44 glucose tolerance in pregnancy? A randomized controlled trial. *BJOG*; 1987. p. 851-4.  
45  
46 52. O'Sullivan JB, Gellis SS, Dandrow RV, Tenney BO. The Potential Diabetic and Her Treatment in  
47 Pregnancy. *Obstet Gynecol*. 1966; 27(5): 683-9.  
48  
49 53. Asemi Z, Samimi M, Tabassi Z, Esmailzadeh A. The effect of DASH diet on pregnancy outcomes in  
50 gestational diabetes: a randomized controlled clinical trial. *Eur J Clin Nutr*. 2014; 68(4): 490-5.  
51  
52 54. Cypryk K, Kaminska P, Kosinski M, Petynska-Marczewska M, Lewinski A. A comparison of the  
53 effectiveness, tolerability and safety of high and low carbohydrate diets in women with gestational  
54 diabetes. *Endokryno Pol*; 2007. p. 314-9.  
55  
56 55. Louie JCY, Markovic TP, Perera N, Foote D, Petocz P, Ross GP, et al. A randomized controlled trial  
57 investigating the effects of a low-glycemic index diet on pregnancy outcomes in gestational diabetes  
58 mellitus. *Diabetes Care*. 2011; 34(11): 2341-6.  
59  
60 56. Moreno-Castilla C, Hernandez M, Bergua M, Alvarez MC, Arce MA, Rodriguez K, et al. Low-  
Carbohydrate Diet for the Treatment of Gestational Diabetes Mellitus: A randomized controlled trial.  
*Diabetes Care*. 2013; 36(8): 2233-8.  
57  
58 57. Rae A, Bond D, Evans S, North F, Roberman B, Walters B. A randomised controlled trial of dietary  
energy restriction in the management of obese women with gestational diabetes. *Aust N Z J Obstet*  
*Gynaecol*; 2000. p. 416-22.  
59  
60 58. Spaulonci CP, Bernardes LS, Trindade TC, Zugaib M, Francisco RPV. Randomized trial of  
metformin vs insulin in the management of gestational diabetes. *Am J Obstet Gynecol*. 2013; 209(1):  
34e1-e7.

- 1  
2  
3 59. Rowan JA, Hague WM, Gao W, Battin MR, Moore MP. Metformin versus Insulin for the  
4 Treatment of Gestational Diabetes. *N Engl J Med*. 2008; 358(19): 2003-15.  
5 60. Niromanesh S, Alavi A, Sharbaf FR, Amjadi N, Moosavi S, Akbari S. Metformin compared with  
6 insulin in the management of gestational diabetes mellitus: A randomized clinical trial. *Diabetes Res*  
7 *Clin Pract*. 2012; 98(3): 422-9.  
8 61. Moore LE, Briery CM, Clokey D, Martin RW, Williford NJ, Bofill JA, et al. Metformin and insulin in  
9 the management of gestational diabetes mellitus: Preliminary results of a comparison. *J Rep Med*  
10 *Obstet Gynecol*. 2007; 52(11): 1011-5.  
11 62. Mesdaghinia E, Samimi M, Homaei Z, Saberi F, Moosavi SGA, Yaribakht M. Comparison of  
12 newborn outcomes in women with gestational diabetes mellitus treated with metformin or insulin: a  
13 randomised blinded trial. *Int J Prev Med*. 2013; 4(3): 327-33.  
14 63. Ijäs H, Vääräsmäki M, Morin-Papunen L, Keravuo R, Ebeling T, Saarela T, et al. Metformin should  
15 be considered in the treatment of gestational diabetes: a prospective randomised study. *BJOG*;  
16 2010. p. 880-5.  
17 64. Hague W, Davoren P, Oliver J, Rowan J. Contraindications to use of metformin. Metformin may  
18 be useful in gestational diabetes. *BMJ*. 2003; 326: 762.  
19 65. Hassan JA, Karim N, Sheikh Z. Metformin prevents macrosomia and neonatal morbidity in  
20 gestational diabetes. *Pak J Med Sci*. 2012; 28(3): 384-9.  
21 66. Ainuddin J, Karim N, Hasan AA, Naqv iSA. Metformin versus insulin treatment in gestational  
22 diabetes in pregnancy in a developing country. A randomized control trial. *Diab Res Clin Prac*. 2014.  
23 67. Anjalakshi C, Balaji V, Balaji MS, Seshiah V. A prospective study comparing insulin and  
24 glibenclamide in gestational diabetes mellitus in Asian Indian women. *Diabetes Res Clin Pract*. 2007;  
25 76(3): 474-5.  
26 68. Bertini AM, Silva JC, Taborda W, Becker F, Lemos Bebbber FR, Zucco Viesi JM, et al. Perinatal  
27 outcomes and the use of oral hypoglycemic agents. *J perinat med*; 2005. p. 519-23.  
28 69. Lain KY, Garabedian MJ, Daftary A, Jeyabalan A. Neonatal adiposity following maternal treatment  
29 of gestational diabetes with glyburide compared with insulin. *Am J Obstet Gynecol*. 2009; 200(5):  
30 501.e1-.e6.  
31 70. Langer O, Conway DL, Berkus MD, Xenakis EM-J, Gonzales O. A Comparison of Glyburide and  
32 Insulin in Women with Gestational Diabetes Mellitus. *N Engl J Med*. 2000; 343(16): 1134-8.  
33 71. Mukhopadhyay P, Bag TS, Kyal A, Saha DP, Khalid N. Oral hypoglycemic glibenclamide: Can it be a  
34 substitute to insulin in the management of gestational diabetes mellitus? a comparative study. *J*  
35 *South Asian Feder Obstet Gynae*. 2012; 4(1): 28-31.  
36 72. Ogunyemi D, Jesse M, Davidson M. Comparison of glyburide versus insulin in management of  
37 gestational diabetes mellitus. *Endo prac*; 2007. p. 427-8.  
38 73. Silva J, Bertini A, Taborda W, F. B, Bebbber F, Aquim G, et al. Glibenclamide in the Treatment for  
39 Gestational Diabetes Mellitus in a Compared Study to Insulin. *Arq Bras Endocrinol Metab*. 2007;  
40 51(4): 541-6.  
41 74. Tempe A, Mayanglambam RD. Glyburide as treatment option for gestational diabetes mellitus. *J*  
42 *Obstet Gynaecol Res*. 2013; 39(6): 1147-52.  
43 75. Moore LE, Clokey D, Rappaport VJ, Curet LB. Metformin compared with glyburide in gestational  
44 diabetes: a randomized controlled trial. *Obst Gynecol*; 2010. p. 55-9.  
45 76. George A, Mathews JE, Sam D, Beck M, Benjamin SJ, Abraham A, et al. Comparison of neonatal  
46 outcomes in women with gestational diabetes with moderate hyperglycaemia on metformin or  
47 glibenclamide - A randomised controlled trial. *Aust N Z J Obstet Gynaecol*; 2015. p. 47-52.  
48 77. Silva JC, Fachin DRIRN, Coral ML, Bertini AM. Perinatal impact of the use of metformin and  
49 glyburide for the treatment of gestational diabetes mellitus. *J Perinat Med*. 2012; 40(3): 225-8.  
50 78. Lawlor DA. The Society for Social Medicine John Pemberton Lecture 2011. Developmental  
51 overnutrition—an old hypothesis with new importance? *Int J Epidemiol*. 2013; 42 (1): 7-29.  
52 79. O'Sullivan JB, Mahan CM. Criteria for the oral glucose tolerance test in pregnancy. *Diabetes*.  
53 1967; 13: 278–85.  
54  
55  
56  
57  
58  
59  
60

1  
2  
3 80. Metzger BE LL, Dyer AR, et al. HAPO Study Cooperative,. Hyperglycemia and Adverse Pregnancy  
4 Outcomes. *N Engl J Med*. 2008; 358: 1991-2002.

5 81. Farrar D, Fairley L, Santorelli G, Tuffnell D, Sheldon TA, Wright J, et al. Association between  
6 hyperglycaemia and adverse perinatal outcomes in south Asian and white British women: analysis of  
7 data from the Born in Bradford cohort. *Lancet Diabetes Endocrinol*. 2015; 3(10): 795-804.

8 82. World Health Organization. Diagnostic criteria and classification of hyperglycaemia first detected  
9 in pregnancy. *World Health Organisation*. 2013;  
10 [http://apps.who.int/iris/bitstream/10665/85975/1/WHO\\_NMH\\_MND\\_13.2\\_eng.pdf?ua=1%2520%2520](http://apps.who.int/iris/bitstream/10665/85975/1/WHO_NMH_MND_13.2_eng.pdf?ua=1%2520%2520)  
11 [520](http://apps.who.int/iris/bitstream/10665/85975/1/WHO_NMH_MND_13.2_eng.pdf?ua=1%2520%2520).  
12  
13  
14  
15  
16  
17  
18  
19  
20  
21  
22  
23  
24  
25  
26  
27  
28  
29  
30  
31  
32  
33  
34  
35  
36  
37  
38  
39  
40  
41  
42  
43  
44  
45  
46  
47  
48  
49  
50  
51  
52  
53  
54  
55  
56  
57  
58  
59  
60

For peer review only

1  
2  
3  
4  
5  
6  
7  
8  
9  
10  
11  
12  
13  
14  
15  
16  
17  
18  
19  
20  
21  
22  
23  
24  
25  
26  
27  
28  
29  
30  
31  
32  
33  
34  
35  
36  
37  
38  
39  
40  
41  
42  
43  
44  
45  
46  
47  
48  
49

Table 1: Trials comparing a package of care starting with dietary modification to routine care and trials comparing a dietary modification with another dietary modification

| First author                                                                                   | Year | Location | Number | Screening strategy used to determine need for diagnostic test | Diagnostic test and glucose thresholds used to diagnose GDM (mmol/L) | Intervention group                      | Control group | Insulin use in diet group | In meta-analyses | Meta-analysis outcome                                                                                                |
|------------------------------------------------------------------------------------------------|------|----------|--------|---------------------------------------------------------------|----------------------------------------------------------------------|-----------------------------------------|---------------|---------------------------|------------------|----------------------------------------------------------------------------------------------------------------------|
| <i>Trials comparing a package of care (starting with dietary modification) to routine care</i> |      |          |        |                                                               |                                                                      |                                         |               |                           |                  |                                                                                                                      |
| Bevier <sup>45</sup>                                                                           | 1999 | USA      | 103    | 50g OGCT >7.8                                                 | Positive OGCT, negative 100g OGTT, levels not reported               | Dietary counselling and home monitoring | Routine care  | If needed                 | yes              | Apgar 5 min, BW, C-section, GA at birth, induction, instrumental birth, macrosomia, pre-eclampsia, shoulder dystocia |
| Bonomo <sup>46</sup>                                                                           | 2005 | Italy    | 300    | Risk factors and 50g OGCT                                     | Positive OGCT ≥7.8, negative 100g OGTT 'C&C criteria'                | Dietary advice and monitoring           | Routine care  | Not reported              | yes              | Apgar 5 min, BW, C-section, GA at birth, LGA, macrosomia, NN hypoglycaemia, NICU admission,                          |

|    |                        |      |                   |      |                                         |                                                                                                    |                                                                                    |              |                 |     |                                                                                                                                                                           |
|----|------------------------|------|-------------------|------|-----------------------------------------|----------------------------------------------------------------------------------------------------|------------------------------------------------------------------------------------|--------------|-----------------|-----|---------------------------------------------------------------------------------------------------------------------------------------------------------------------------|
| 1  |                        |      |                   |      |                                         |                                                                                                    |                                                                                    |              |                 |     |                                                                                                                                                                           |
| 2  |                        |      |                   |      |                                         |                                                                                                    |                                                                                    |              |                 |     |                                                                                                                                                                           |
| 3  |                        |      |                   |      |                                         |                                                                                                    |                                                                                    |              |                 |     |                                                                                                                                                                           |
| 4  |                        |      |                   |      |                                         |                                                                                                    |                                                                                    |              |                 |     |                                                                                                                                                                           |
| 5  | Crowther <sup>47</sup> | 2005 | UK /<br>Australia | 1000 | Risk factors<br>or 50g OGCT             | 75g OGTT<br>fasting <7.8<br>and 2-hr >7.8<br>and < 11.1                                            | Individualised<br>dietary advice,<br>monitoring &<br>pharmacological<br>treatments | Routine care | If needed       | yes | Apgar 5 min<br><7, BW, C-<br>sectionGA at<br>birth,<br>induction,<br>macrosomia,<br>NN<br>hypoglycaemia,<br>NICU<br>admission, pre-<br>eclampsia,<br>shoulder<br>dystocia |
| 6  |                        |      |                   |      |                                         |                                                                                                    |                                                                                    |              |                 |     |                                                                                                                                                                           |
| 7  |                        |      |                   |      |                                         |                                                                                                    |                                                                                    |              |                 |     |                                                                                                                                                                           |
| 8  |                        |      |                   |      |                                         |                                                                                                    |                                                                                    |              |                 |     |                                                                                                                                                                           |
| 9  |                        |      |                   |      |                                         |                                                                                                    |                                                                                    |              |                 |     |                                                                                                                                                                           |
| 10 |                        |      |                   |      |                                         |                                                                                                    |                                                                                    |              |                 |     |                                                                                                                                                                           |
| 11 |                        |      |                   |      |                                         |                                                                                                    |                                                                                    |              |                 |     |                                                                                                                                                                           |
| 12 |                        |      |                   |      |                                         |                                                                                                    |                                                                                    |              |                 |     |                                                                                                                                                                           |
| 13 |                        |      |                   |      |                                         |                                                                                                    |                                                                                    |              |                 |     |                                                                                                                                                                           |
| 14 |                        |      |                   |      |                                         |                                                                                                    |                                                                                    |              |                 |     |                                                                                                                                                                           |
| 15 |                        |      |                   |      |                                         |                                                                                                    |                                                                                    |              |                 |     |                                                                                                                                                                           |
| 16 |                        |      |                   |      |                                         |                                                                                                    |                                                                                    |              |                 |     |                                                                                                                                                                           |
| 17 |                        |      |                   |      |                                         |                                                                                                    |                                                                                    |              |                 |     |                                                                                                                                                                           |
| 18 |                        |      |                   |      |                                         |                                                                                                    |                                                                                    |              |                 |     |                                                                                                                                                                           |
| 19 | Deveer <sup>33</sup>   | 2013 | Turkey            | 100  | Universal 50g<br>OGCT >7.8<br>and <10.0 | Positive OGCT,<br>negative 100g<br>OGTT fasting<br><5.3 1-hr <10.0,<br>2-hr <8.8 and 3-<br>hr <7.8 | Calorie diet                                                                       | Routine care | Not<br>reported | yes | BW, C-section,<br>gest age at<br>birth, LGA,<br>macrosomia,<br>NICU<br>admission, pre-<br>eclampsia,<br>preterm birth                                                     |
| 20 |                        |      |                   |      |                                         |                                                                                                    |                                                                                    |              |                 |     |                                                                                                                                                                           |
| 21 |                        |      |                   |      |                                         |                                                                                                    |                                                                                    |              |                 |     |                                                                                                                                                                           |
| 22 |                        |      |                   |      |                                         |                                                                                                    |                                                                                    |              |                 |     |                                                                                                                                                                           |
| 23 |                        |      |                   |      |                                         |                                                                                                    |                                                                                    |              |                 |     |                                                                                                                                                                           |
| 24 |                        |      |                   |      |                                         |                                                                                                    |                                                                                    |              |                 |     |                                                                                                                                                                           |
| 25 |                        |      |                   |      |                                         |                                                                                                    |                                                                                    |              |                 |     |                                                                                                                                                                           |
| 26 |                        |      |                   |      |                                         |                                                                                                    |                                                                                    |              |                 |     |                                                                                                                                                                           |
| 27 |                        |      |                   |      |                                         |                                                                                                    |                                                                                    |              |                 |     |                                                                                                                                                                           |
| 28 | Elnour <sup>48</sup>   | 2006 | UAE               | 180  | Not reported                            | 100g OGTT,<br>'C&C criteria'                                                                       | Diet education,<br>exercise,<br>monitoring &<br>pharmacological<br>treatments      | Routine care | If needed       | yes | C-section, LGA,<br>macrosomia,<br>NN<br>hypoglycaemia,<br>NICU<br>admission, pre-<br>eclampsia,<br>preterm birth,<br>shoulder<br>dystocia                                 |
| 29 |                        |      |                   |      |                                         |                                                                                                    |                                                                                    |              |                 |     |                                                                                                                                                                           |
| 30 |                        |      |                   |      |                                         |                                                                                                    |                                                                                    |              |                 |     |                                                                                                                                                                           |
| 31 |                        |      |                   |      |                                         |                                                                                                    |                                                                                    |              |                 |     |                                                                                                                                                                           |
| 32 |                        |      |                   |      |                                         |                                                                                                    |                                                                                    |              |                 |     |                                                                                                                                                                           |
| 33 |                        |      |                   |      |                                         |                                                                                                    |                                                                                    |              |                 |     |                                                                                                                                                                           |
| 34 |                        |      |                   |      |                                         |                                                                                                    |                                                                                    |              |                 |     |                                                                                                                                                                           |
| 35 |                        |      |                   |      |                                         |                                                                                                    |                                                                                    |              |                 |     |                                                                                                                                                                           |
| 36 |                        |      |                   |      |                                         |                                                                                                    |                                                                                    |              |                 |     |                                                                                                                                                                           |
| 37 |                        |      |                   |      |                                         |                                                                                                    |                                                                                    |              |                 |     |                                                                                                                                                                           |
| 38 |                        |      |                   |      |                                         |                                                                                                    |                                                                                    |              |                 |     |                                                                                                                                                                           |
| 39 |                        |      |                   |      |                                         |                                                                                                    |                                                                                    |              |                 |     |                                                                                                                                                                           |
| 40 |                        |      |                   |      |                                         |                                                                                                    |                                                                                    |              |                 |     |                                                                                                                                                                           |
| 41 |                        |      |                   |      |                                         |                                                                                                    |                                                                                    |              |                 |     |                                                                                                                                                                           |
| 42 |                        |      |                   |      |                                         |                                                                                                    |                                                                                    |              |                 |     |                                                                                                                                                                           |
| 43 |                        |      |                   |      |                                         |                                                                                                    |                                                                                    |              |                 |     |                                                                                                                                                                           |
| 44 |                        |      |                   |      |                                         |                                                                                                    |                                                                                    |              |                 |     |                                                                                                                                                                           |
| 45 |                        |      |                   |      |                                         |                                                                                                    |                                                                                    |              |                 |     |                                                                                                                                                                           |
| 46 |                        |      |                   |      |                                         |                                                                                                    |                                                                                    |              |                 |     |                                                                                                                                                                           |
| 47 |                        |      |                   |      |                                         |                                                                                                    |                                                                                    |              |                 |     |                                                                                                                                                                           |
| 48 |                        |      |                   |      |                                         |                                                                                                    |                                                                                    |              |                 |     |                                                                                                                                                                           |
| 49 |                        |      |                   |      |                                         |                                                                                                    |                                                                                    |              |                 |     |                                                                                                                                                                           |

1  
2  
3  
4  
5  
6  
7  
8  
9  
10  
11  
12  
13  
14  
15  
16  
17  
18  
19  
20  
21  
22  
23  
24  
25  
26  
27  
28  
29  
30  
31  
32  
33  
34  
35  
36  
37  
38  
39  
40  
41  
42  
43  
44  
45  
46  
47  
48  
49

|                      |      |        |     |                     |                                                          |                                                                                  |              |                                      |     |                                                                                                                                      |
|----------------------|------|--------|-----|---------------------|----------------------------------------------------------|----------------------------------------------------------------------------------|--------------|--------------------------------------|-----|--------------------------------------------------------------------------------------------------------------------------------------|
| Fadi <sup>34</sup>   | 2015 | Sweden | 66  | Risk factors        | 75g OGTT <7.0, ≥10.0 <12.2                               | Diet education, exercise, monitoring & pharmacological treatments                | Routine care | If needed in intervention group only | yes | BW, C-section, LGA, GA at birth, macrosomia, pre-eclampsia, instrumental birth, induction, NICU admission                            |
| Garner <sup>49</sup> | 1997 | Canada | 299 | 75g OGCT >8.0       | 75g OGTT fasting >7.5 and 2-hr >9.6                      | Dietary counselling, restricted calorie intake, monitoring & insulin if required | Routine care | If needed                            | yes | BW, C-section, GA at birth, macrosomia, NN hypoglycaemia, pre-eclampsia, preterm birth, shoulder dystocia                            |
| Landon <sup>50</sup> | 2009 | USA    | 958 | 50g OGCT >7.5-<11.1 | 100g OGTT fasting <5.3, 2 or more 1-hr >8.6 or 2-hr >8.6 | Individualised dietary advice, monitoring & insulin                              | Routine care | If needed                            | yes | BW, C-section, GA at birth, induction, macrosomia, NN hypoglycaemia, NICU admission, pre-eclampsia, preterm birth, shoulder dystocia |

For Peer review only

|    |                          |      |           |     |                      |                                                                                                                  |                                                  |                        |                            |     |                                                                                                                           |
|----|--------------------------|------|-----------|-----|----------------------|------------------------------------------------------------------------------------------------------------------|--------------------------------------------------|------------------------|----------------------------|-----|---------------------------------------------------------------------------------------------------------------------------|
| 1  |                          |      |           |     |                      |                                                                                                                  |                                                  |                        |                            |     |                                                                                                                           |
| 2  |                          |      |           |     |                      |                                                                                                                  |                                                  |                        |                            |     |                                                                                                                           |
| 3  |                          |      |           |     |                      |                                                                                                                  |                                                  |                        |                            |     |                                                                                                                           |
| 4  |                          |      |           |     |                      |                                                                                                                  |                                                  |                        |                            |     |                                                                                                                           |
| 5  | Li <sup>51</sup>         | 1987 | Hong Kong | 58  | Risk factors         | 100g OGTT, two or more: fasting >5.8, 1 hr >10.6, 2-hr >9.2, 3-hr >8.1, then 75g OGTT fasting <8.0 or 2-hr <11.0 | 30-35g/kg carbohydrate diet and monitoring       | Routine care           | Not reported               | yes | BW, C-section, GA at birth, induction, macrosomia,                                                                        |
| 6  |                          |      |           |     |                      |                                                                                                                  |                                                  |                        |                            |     |                                                                                                                           |
| 7  |                          |      |           |     |                      |                                                                                                                  |                                                  |                        |                            |     |                                                                                                                           |
| 8  |                          |      |           |     |                      |                                                                                                                  |                                                  |                        |                            |     |                                                                                                                           |
| 9  |                          |      |           |     |                      |                                                                                                                  |                                                  |                        |                            |     |                                                                                                                           |
| 10 |                          |      |           |     |                      |                                                                                                                  |                                                  |                        |                            |     |                                                                                                                           |
| 11 |                          |      |           |     |                      |                                                                                                                  |                                                  |                        |                            |     |                                                                                                                           |
| 12 |                          |      |           |     |                      |                                                                                                                  |                                                  |                        |                            |     |                                                                                                                           |
| 13 |                          |      |           |     |                      |                                                                                                                  |                                                  |                        |                            |     |                                                                                                                           |
| 14 | O'Sullivan <sup>52</sup> | 1966 | USA       | 615 | OGCT or risk factors | 100g OGTT two or more fasting > 6.1, or 1-hr > 9.1 or 2-hr > 6.7 or 3-hr >6.1                                    | Low calorie diabetic diet                        | Standard diabetic diet | Only in intervention group | yes | Macrosomia, preterm birth                                                                                                 |
| 15 |                          |      |           |     |                      |                                                                                                                  |                                                  |                        |                            |     |                                                                                                                           |
| 16 |                          |      |           |     |                      |                                                                                                                  |                                                  |                        |                            |     |                                                                                                                           |
| 17 |                          |      |           |     |                      |                                                                                                                  |                                                  |                        |                            |     |                                                                                                                           |
| 18 |                          |      |           |     |                      |                                                                                                                  |                                                  |                        |                            |     |                                                                                                                           |
| 19 | Yang <sup>35</sup>       | 2003 | China     | 150 | Not reported         | Not reported                                                                                                     | 'intensive' diabetes management                  | Routine care           | If needed                  | yes | C-Section, shoulder dystocia                                                                                              |
| 20 |                          |      |           |     |                      |                                                                                                                  |                                                  |                        |                            |     |                                                                                                                           |
| 21 |                          |      |           |     |                      |                                                                                                                  |                                                  |                        |                            |     |                                                                                                                           |
| 22 |                          |      |           |     |                      |                                                                                                                  |                                                  |                        |                            |     |                                                                                                                           |
| 23 | Yang <sup>36</sup>       | 2014 | China     | 700 |                      | 75g OGTT fasting 5.1, 1 hr 10.0, 2 hr 8.5                                                                        | Individual & group dietary/physical intervention | Routine care           | If needed                  | yes | BW, C-section, GA at birth, induction, macrosomia, NN hypoglycaemia, PIH, pre-eclampsia, preterm birth, shoulder dystocia |
| 24 |                          |      |           |     |                      |                                                                                                                  |                                                  |                        |                            |     |                                                                                                                           |
| 25 |                          |      |           |     |                      |                                                                                                                  |                                                  |                        |                            |     |                                                                                                                           |
| 26 |                          |      |           |     |                      |                                                                                                                  |                                                  |                        |                            |     |                                                                                                                           |
| 27 |                          |      |           |     |                      |                                                                                                                  |                                                  |                        |                            |     |                                                                                                                           |
| 28 |                          |      |           |     |                      |                                                                                                                  |                                                  |                        |                            |     |                                                                                                                           |
| 29 |                          |      |           |     |                      |                                                                                                                  |                                                  |                        |                            |     |                                                                                                                           |
| 30 |                          |      |           |     |                      |                                                                                                                  |                                                  |                        |                            |     |                                                                                                                           |
| 31 |                          |      |           |     |                      |                                                                                                                  |                                                  |                        |                            |     |                                                                                                                           |
| 32 |                          |      |           |     |                      |                                                                                                                  |                                                  |                        |                            |     |                                                                                                                           |
| 33 |                          |      |           |     |                      |                                                                                                                  |                                                  |                        |                            |     |                                                                                                                           |
| 34 |                          |      |           |     |                      |                                                                                                                  |                                                  |                        |                            |     |                                                                                                                           |
| 35 |                          |      |           |     |                      |                                                                                                                  |                                                  |                        |                            |     |                                                                                                                           |
| 36 |                          |      |           |     |                      |                                                                                                                  |                                                  |                        |                            |     |                                                                                                                           |
| 37 |                          |      |           |     |                      |                                                                                                                  |                                                  |                        |                            |     |                                                                                                                           |
| 38 |                          |      |           |     |                      |                                                                                                                  |                                                  |                        |                            |     |                                                                                                                           |
| 39 |                          |      |           |     |                      |                                                                                                                  |                                                  |                        |                            |     |                                                                                                                           |
| 40 |                          |      |           |     |                      |                                                                                                                  |                                                  |                        |                            |     |                                                                                                                           |
| 41 |                          |      |           |     |                      |                                                                                                                  |                                                  |                        |                            |     |                                                                                                                           |
| 42 |                          |      |           |     |                      |                                                                                                                  |                                                  |                        |                            |     |                                                                                                                           |
| 43 |                          |      |           |     |                      |                                                                                                                  |                                                  |                        |                            |     |                                                                                                                           |
| 44 |                          |      |           |     |                      |                                                                                                                  |                                                  |                        |                            |     |                                                                                                                           |
| 45 |                          |      |           |     |                      |                                                                                                                  |                                                  |                        |                            |     |                                                                                                                           |
| 46 |                          |      |           |     |                      |                                                                                                                  |                                                  |                        |                            |     |                                                                                                                           |
| 47 |                          |      |           |     |                      |                                                                                                                  |                                                  |                        |                            |     |                                                                                                                           |
| 48 |                          |      |           |     |                      |                                                                                                                  |                                                  |                        |                            |     |                                                                                                                           |
| 49 |                          |      |           |     |                      |                                                                                                                  |                                                  |                        |                            |     |                                                                                                                           |

*Trials comparing a dietary modification with another dietary modification*

|    |                               |      |           |     |                                                    |                                                                                 |                         |                             |                                                         |    |   |
|----|-------------------------------|------|-----------|-----|----------------------------------------------------|---------------------------------------------------------------------------------|-------------------------|-----------------------------|---------------------------------------------------------|----|---|
| 1  |                               |      |           |     |                                                    |                                                                                 |                         |                             |                                                         |    |   |
| 2  |                               |      |           |     |                                                    |                                                                                 |                         |                             |                                                         |    |   |
| 3  |                               |      |           |     |                                                    |                                                                                 |                         |                             |                                                         |    |   |
| 4  |                               |      |           |     |                                                    |                                                                                 |                         |                             |                                                         |    |   |
| 5  | Asemi <sup>53</sup>           | 2014 | Iran      | 52  | 50g OGCT                                           | OGCT $\geq 7.8$ , 75g OGTT Fasting: $>5.1$ , 1 hr $\geq 10.0$ , 2 hr $\geq 8.5$ | DASH diet <sup>a</sup>  | Control diet                | Women with GDM excluded, therefore insulin not required | no | - |
| 6  |                               |      |           |     |                                                    |                                                                                 |                         |                             |                                                         |    |   |
| 7  |                               |      |           |     |                                                    |                                                                                 |                         |                             |                                                         |    |   |
| 8  |                               |      |           |     |                                                    |                                                                                 |                         |                             |                                                         |    |   |
| 9  |                               |      |           |     |                                                    |                                                                                 |                         |                             |                                                         |    |   |
| 10 |                               |      |           |     |                                                    |                                                                                 |                         |                             |                                                         |    |   |
| 11 |                               |      |           |     |                                                    |                                                                                 |                         |                             |                                                         |    |   |
| 12 |                               |      |           |     |                                                    |                                                                                 |                         |                             |                                                         |    |   |
| 13 | Cypryk <sup>54</sup>          | 2007 | Poland    | 30  | Not reported                                       | levels not reported only that the WHO criteria was used                         | High carbohydrate diet  | Low carbohydrate diet       | If needed                                               | no | - |
| 14 |                               |      |           |     |                                                    |                                                                                 |                         |                             |                                                         |    |   |
| 15 |                               |      |           |     |                                                    |                                                                                 |                         |                             |                                                         |    |   |
| 16 |                               |      |           |     |                                                    |                                                                                 |                         |                             |                                                         |    |   |
| 17 |                               |      |           |     |                                                    |                                                                                 |                         |                             |                                                         |    |   |
| 18 | Louie <sup>55</sup>           | 2011 | Australia | 99  | Not reported                                       | 75g OGTT $\geq 5.5$ , 1-hr $\geq 10.0$ or 2-h $\geq 8.0$                        | Low GI diet             | High fibre moderate GI diet | If needed                                               | no | - |
| 19 |                               |      |           |     |                                                    |                                                                                 |                         |                             |                                                         |    |   |
| 20 |                               |      |           |     |                                                    |                                                                                 |                         |                             |                                                         |    |   |
| 21 | Ma <sup>37</sup>              | 2015 | China     | 83  | 50g OGCT                                           | 75g OGTT $\geq 5.8$ , 1-hr $\geq 10.6$ , 2-h $\geq 9.2$ or 3-hr 8.1             | Low glycaemia load diet | Usual diet                  | If needed <sup>b</sup>                                  | no | - |
| 22 |                               |      |           |     |                                                    |                                                                                 |                         |                             |                                                         |    |   |
| 23 |                               |      |           |     |                                                    |                                                                                 |                         |                             |                                                         |    |   |
| 24 | Moreno-Castilla <sup>56</sup> | 2013 | Spain     | 152 | 50g OGCT $\geq 7.8$                                | 100g OGTT $>5.8$ , 1 hr $>10.6$ , 2-hr $>9.2$ , 3-hr $>8.1$                     | Low carbohydrate diet   | Control diet                | If needed                                               | no | - |
| 25 |                               |      |           |     |                                                    |                                                                                 |                         |                             |                                                         |    |   |
| 26 |                               |      |           |     |                                                    |                                                                                 |                         |                             |                                                         |    |   |
| 27 |                               |      |           |     |                                                    |                                                                                 |                         |                             |                                                         |    |   |
| 28 |                               |      |           |     |                                                    |                                                                                 |                         |                             |                                                         |    |   |
| 29 | Rae <sup>57</sup>             | 2000 | Australia | 124 | Not reported                                       | (glucose load not reported) OGTT fasting $>5.4$ or 2-hour $>7.9$                | Calorie restricted diet | Usual diet                  | If needed                                               | no | - |
| 30 |                               |      |           |     |                                                    |                                                                                 |                         |                             |                                                         |    |   |
| 31 |                               |      |           |     |                                                    |                                                                                 |                         |                             |                                                         |    |   |
| 32 |                               |      |           |     |                                                    |                                                                                 |                         |                             |                                                         |    |   |
| 33 |                               |      |           |     |                                                    |                                                                                 |                         |                             |                                                         |    |   |
| 34 | Yao <sup>38</sup>             | 2015 | China     | 33  | 50g OGCT fasting $\geq 5.8$ 'post-load' $\geq 7.8$ | 100g OGTT fasting $>5.3$ , 1 hr $>10.0$ , 2-hr $>8.6$ , 3-hr $>7.8$             | DASH diet               | Usual diet                  | If needed                                               | no | - |
| 35 |                               |      |           |     |                                                    |                                                                                 |                         |                             |                                                         |    |   |
| 36 |                               |      |           |     |                                                    |                                                                                 |                         |                             |                                                         |    |   |
| 37 |                               |      |           |     |                                                    |                                                                                 |                         |                             |                                                         |    |   |
| 38 |                               |      |           |     |                                                    |                                                                                 |                         |                             |                                                         |    |   |

<sup>a</sup>DASH diet = Dietary Approaches to Stop Hypertension

<sup>b</sup>women who required insulin were excluded from the trial's analyses



Table 2: Trials comparing metformin to insulin

| First author           | Year | Location  | Number | Diagnostic test and glucose thresholds used to diagnose GDM     | Screening strategy <sup>a</sup> | Meta-analysis outcome                                                                                 |
|------------------------|------|-----------|--------|-----------------------------------------------------------------|---------------------------------|-------------------------------------------------------------------------------------------------------|
| Ainuddin <sup>66</sup> | 2014 | Pakistan  | 150    | 75g OGTT two or more; fasting 5.3, 1 hr 10.0, 2 hr 8.6          | 50g OGCT $\geq$ 7.8             | PIH, pre-eclampsia, GA at delivery, induction, C-section, LGA, NICU admission, neonatal hypoglycaemia |
| Hague <sup>64</sup>    | 2003 | Australia | 30     | 75g OGTT fasting >5.5 or 2-hr >8.0                              | Risk factors                    | BW, Pre-eclampsia, GA at birth, induction, C-section, macrosomia, hypoglycaemia                       |
| Hassan <sup>65</sup>   | 2012 | Pakistan  | 150    | 75g OGTT 2 or more levels fasting >5.3, 1-hr >10.0 or 2-hr >8.6 | 50g OGCT $\geq$ 7.8             | Apgar 5 min, GA at birth, induction, C-section, BW, macrosomia, hypoglycaemia, NICU admission         |
| Ijas <sup>63</sup>     | 2010 | Finland   | 100    | 75g OGTT fasting >5.3, 1-hr >11.0 or 2-hr >9.6                  | Risk-based                      | Apgar 5 min, BW, C-section, GA at birth, induction, instrumental birth, LGA,                          |

|    |                           |      |                |     |                                                                              |                              |                                                                           |
|----|---------------------------|------|----------------|-----|------------------------------------------------------------------------------|------------------------------|---------------------------------------------------------------------------|
| 1  |                           |      |                |     |                                                                              |                              |                                                                           |
| 2  |                           |      |                |     |                                                                              |                              |                                                                           |
| 3  |                           |      |                |     |                                                                              |                              |                                                                           |
| 4  |                           |      |                |     |                                                                              |                              |                                                                           |
| 5  |                           |      |                |     |                                                                              |                              | macrosomia,                                                               |
| 6  |                           |      |                |     |                                                                              |                              | hypoglycaemia,                                                            |
| 7  |                           |      |                |     |                                                                              |                              | NICU admission                                                            |
| 8  | Mesdaghinia <sup>62</sup> | 2013 | Iran           | 200 | 100g OGTT two or more; fasting >5.3 or 1-hr >10.0 or 2-hr >8.6 or 3-hr >7.8  | 50g OGCT—levels not reported | BW, macrosomia, LGA,                                                      |
| 9  |                           |      |                |     |                                                                              |                              | hypoglycaemia,                                                            |
| 10 |                           |      |                |     |                                                                              |                              | NICU admission,                                                           |
| 11 |                           |      |                |     |                                                                              |                              | shoulder dystocia,                                                        |
| 12 |                           |      |                |     |                                                                              |                              | 5 min Apgar <7,                                                           |
| 13 |                           |      |                |     |                                                                              |                              | preterm birth                                                             |
| 14 | Moore <sup>61</sup>       | 2007 | USA            | 63  | 100g OGTT two or more; fasting >5.8 or 1-hr >10.5 or 2-hr >9.1 or 3-hr >8.0  | 50g OGCT ≥7.8                | Apgar 5 min, BW, macrosomia,                                              |
| 15 |                           |      |                |     |                                                                              |                              | hypoglycaemia,                                                            |
| 16 |                           |      |                |     |                                                                              |                              | NICU admission                                                            |
| 17 | Niromanesh <sup>60</sup>  | 2012 | Iran           | 160 | 100g OGTT two or more fasting >5.3, 1-hr >10.0, 2-hr, 3-hr >8.6 or 3-hr >7.8 | 50g OGCT ≥7.2                | Apgar 5 min, pre-eclampsia, PIH GA at birth, induction,                   |
| 18 |                           |      |                |     |                                                                              |                              | C-section,                                                                |
| 19 |                           |      |                |     |                                                                              |                              | shoulder dystocia,                                                        |
| 20 |                           |      |                |     |                                                                              |                              | BW macrosomia,                                                            |
| 21 |                           |      |                |     |                                                                              |                              | LGA, NICU admission,                                                      |
| 22 |                           |      |                |     |                                                                              |                              | hypoglycaemia,                                                            |
| 23 |                           |      |                |     |                                                                              |                              | preterm birth                                                             |
| 24 | Rowan <sup>59</sup>       | 2008 | Australia / NZ | 751 | 75g OGTT fasting >5.5 or 2-hr >8.0                                           | Risk factors                 | Apgar 5 min <7, BW, GA at birth, LGA, NICU admission, PIH, pre-eclampsia, |
| 25 |                           |      |                |     |                                                                              |                              | preterm birth                                                             |
| 26 | Spaulonci <sup>58</sup>   | 2013 | Brazil         | 94  | 75g or 100g OGTT fasting >5.3 or 1-hr >10.0 or 2-hr >8.0                     | No screening                 | GA at birth, BW, Apgar 5 min, macrosomia,                                 |
| 27 |                           |      |                |     |                                                                              |                              |                                                                           |
| 28 |                           |      |                |     |                                                                              |                              |                                                                           |
| 29 |                           |      |                |     |                                                                              |                              |                                                                           |
| 30 |                           |      |                |     |                                                                              |                              |                                                                           |
| 31 |                           |      |                |     |                                                                              |                              |                                                                           |
| 32 |                           |      |                |     |                                                                              |                              |                                                                           |
| 33 |                           |      |                |     |                                                                              |                              |                                                                           |
| 34 |                           |      |                |     |                                                                              |                              |                                                                           |
| 35 |                           |      |                |     |                                                                              |                              |                                                                           |
| 36 |                           |      |                |     |                                                                              |                              |                                                                           |
| 37 |                           |      |                |     |                                                                              |                              |                                                                           |
| 38 |                           |      |                |     |                                                                              |                              |                                                                           |
| 39 |                           |      |                |     |                                                                              |                              |                                                                           |
| 40 |                           |      |                |     |                                                                              |                              |                                                                           |
| 41 |                           |      |                |     |                                                                              |                              |                                                                           |
| 42 |                           |      |                |     |                                                                              |                              |                                                                           |
| 43 |                           |      |                |     |                                                                              |                              |                                                                           |
| 44 |                           |      |                |     |                                                                              |                              |                                                                           |
| 45 |                           |      |                |     |                                                                              |                              |                                                                           |
| 46 |                           |      |                |     |                                                                              |                              |                                                                           |
| 47 |                           |      |                |     |                                                                              |                              |                                                                           |
| 48 |                           |      |                |     |                                                                              |                              |                                                                           |
| 49 |                           |      |                |     |                                                                              |                              |                                                                           |

|                      |      |            |     |                                                                                                                        |                           |                                                                                                                                                                                             |
|----------------------|------|------------|-----|------------------------------------------------------------------------------------------------------------------------|---------------------------|---------------------------------------------------------------------------------------------------------------------------------------------------------------------------------------------|
|                      |      |            |     | and two or more<br>fasting >5.3, 1-hr<br>>10.0, 2-hr, 3-hr >8.6<br>or 3-hr >7.8<br>respectively                        |                           | hypoglycaemia,<br>pre-eclampsia,<br>preterm birth, C-<br>section                                                                                                                            |
| Tertti <sup>43</sup> | 2013 | Finland    | 217 | 75g OGTT both<br>criteria: fasting ≥4.8,<br>1-h ≥10.0, 2-h ≥8.7<br>and fasting ≥5.3,<br>≥10.0 and ≥8.6<br>respectively | Risk factors              | GA at birth, BW,<br>Apgar at 5 min,<br>induction,<br>instrumental<br>birth, C-section,<br>LGA, macrosomia,<br>preterm birth,<br>PIH, pre-<br>eclampsia, NICU<br>admission,<br>hypoglycaemia |
| Zinnat <sup>31</sup> | 2013 | Bangladesh | 450 | Not reported <sup>d</sup>                                                                                              | Not reported <sup>d</sup> | Macrosomia,<br>shoulder dystocia,<br>C-section,<br>instrumental birth<br>hypoglycaemia,<br>NICU admission,                                                                                  |

<sup>a</sup>It is assumed unless otherwise reported, that the screening strategy advocated by the criteria used was adhered to

<sup>d</sup>Conference abstract

Table 3: Trials comparing glibenclamide (glyburide) to insulin

| First author               | Year | Location | Number | Diagnostic test and glucose thresholds used to diagnose GDM                    | Screening strategy <sup>a</sup> | Outcome                                                                                   |
|----------------------------|------|----------|--------|--------------------------------------------------------------------------------|---------------------------------|-------------------------------------------------------------------------------------------|
| Anjalakshi <sup>67</sup>   | 2007 | India    | 23     | 75g OGTT 2-hr >7.8                                                             | Universal OGTT                  | BW                                                                                        |
| Bertini <sup>68</sup>      | 2005 | Brazil   | 70     | 75g OGTT fasting >6.1 or 2-hr >7.8                                             | Not reported                    | BW, C-section, Apgar 5 min, GA at birth, LGA                                              |
| Lain <sup>69</sup>         | 2009 | USA      | 99     | 100g OGTT 2 or more: fasting >5.3, 1-hr >8.6 or 2-hr >8.6                      | 50g >7.5                        | BW, GA at birth, LGA, macrosomia                                                          |
| Langer <sup>70</sup>       | 2000 | USA      | 404    | 100g OGTT fasting >5.3-<7.8                                                    | 50g OGCT >7.3                   | BW, C-section, GA at birth, LGA, macrosomia, hypoglycaemia, NICU admission, pre-eclampsia |
| Mirzamoradi <sup>32</sup>  | 2015 | Iran     | 96     | Glucose load not reported; OGTT 2 or more: fasting >5.3, 1-hr >10.0, 2-hr >8.3 | Universal OGTT                  | BW, C-section, GA at birth, NICU admission, hypoglycaemia, pre-eclampsia                  |
| Mukhopadhyay <sup>71</sup> | 2012 | India    | 60     | 75g OGTT 2-hr >7.8                                                             | No screening                    | BW, GA at birth, LGA, hypoglycaemia                                                       |
| Ogunyemi <sup>72</sup>     | 2007 | USA      | 97     | Not reported                                                                   | Not reported                    | BW, C-section, GA at birth, hypoglycaemia,                                                |

|    |                     |      |        |    |                   |                 |
|----|---------------------|------|--------|----|-------------------|-----------------|
| 1  |                     |      |        |    |                   |                 |
| 2  |                     |      |        |    |                   |                 |
| 3  |                     |      |        |    |                   |                 |
| 4  |                     |      |        |    |                   |                 |
| 5  | Silva <sup>73</sup> | 2007 | Brazil | 68 | 75g OGTT fasting  | No screening    |
| 6  |                     |      |        |    | >6.1 or 2-hr >7.8 | BW, C-section,  |
| 7  | Tempe <sup>74</sup> | 2013 | India  | 64 | 100g OGTT 2 or    | 50g OGCT >7.2   |
| 8  |                     |      |        |    | more: fasting     | BW, GA birth,   |
| 9  |                     |      |        |    | >5.3, 1-hr >10.0, | macrosomia,     |
| 10 |                     |      |        |    | 2-hr >8.6 or 3-hr | hypoglycaemia,  |
| 11 |                     |      |        |    | >7.8              | NICU admission, |
| 12 |                     |      |        |    |                   | pre-eclampsia,  |
| 13 |                     |      |        |    |                   | preterm birth   |
| 14 |                     |      |        |    |                   |                 |

<sup>a</sup>It is assumed unless otherwise reported, that the screening strategy advocated by the criteria used was adhered to

1  
2  
3  
4  
5  
6  
7  
8  
9  
10  
11  
12  
13  
14  
15  
16  
17  
18  
19  
20  
21  
22  
23  
24  
25  
26  
27  
28  
29  
30  
31  
32  
33  
34  
35  
36  
37  
38  
39  
40  
41  
42  
43  
44  
45  
46  
47  
48  
49

Table 4: Trials comparing glibenclamide to metformin

| First author         | Year | Location | Number | Diagnostic test and thresholds used to diagnose GDM (mmol/L)                   | Screening strategy <sup>a</sup> | Outcome                                                                                                 |
|----------------------|------|----------|--------|--------------------------------------------------------------------------------|---------------------------------|---------------------------------------------------------------------------------------------------------|
| George <sup>76</sup> | 2015 | India    | 159    | 100g OGTT 2 or more; fasting $\geq 5.3$ or 1 hr $\geq 10.0$ or 2-hr $\geq 8.6$ | Not reported                    | BW, GA at birth, macrosomia, hypoglycaemia                                                              |
| Moore <sup>75</sup>  | 2010 | USA      | 149    | 100g OGTT 2 or more; fasting $> 5.3$ or 2-hr $> 6.7$                           | 50g OGCT $> 7.2$                | BW, C-section, GA at birth, macrosomia, hypoglycaemia, NICU admission, pre-eclampsia, shoulder dystocia |
| Silva <sup>77</sup>  | 2012 | Brazil   | 200    | 75g OGTT fasting $> 5.3$ or 1-hr $> 10.0$ or 2-hr $> 8.0$                      | No screening                    | Apgar 5 min, BW, C-section, GA at birth, LGA, macrosomia, hypoglycaemia, NICU admission                 |

Table 5: Estimated probability (%) of a treatment being the most effective in reducing the risk of a dichotomous outcome.

| Outcome                                  | Treatment |           |                           |
|------------------------------------------|-----------|-----------|---------------------------|
|                                          | Insulin   | Metformin | Glibenclamide (Glyburide) |
| <i>LGA</i>                               | 7.1       | 92.8      | 0.1                       |
| <i>Macrosomia</i>                        | 5.6       | 94.0      | 0.3                       |
| <i>Neonatal intensive care admission</i> | 0.5       | 61.2      | 38.3                      |
| <i>Neonatal hypoglycaemia</i>            | 3.3       | 96.3      | 0.4                       |
| <i>Caesarean section</i>                 | 10.4      | 9.7       | 79.9                      |
| <i>Pre-eclampsia</i>                     | 4.8       | 84.0      | 11.2                      |

Figure 1: Search process

Figure 2: Forest plots for treatment comparisons and perinatal outcomes

2a: Packages of care (starting with dietary modification) versus routine care: dichotomous outcomes

2b: Packages of care (starting with dietary modification) versus routine care: continuous outcomes

2c: Metformin versus insulin: dichotomous outcomes

2d: Metformin versus insulin: continuous outcomes

2e: Glibenclamide versus insulin: dichotomous outcomes

2f: Glibenclamide versus insulin: continuous outcomes

2g: Glibenclamide versus metformin: dichotomous outcomes

2h: Glibenclamide versus metformin: continuous outcomes

Figure 3: Network meta-analysis, relationship of treatment comparisons

Figure 4: Network meta-analysis comparing metformin, glibenclamide and insulin. First better – treatment listed first in the outcome column is superior; second better – treatment listed second in the outcome column is superior.

Supplementary Figure 1: Dietary modification trials: dichotomous outcomes

Supplementary Figure 2: Dietary modification trials: continuous outcomes

1  
2  
3  
4  
5  
6  
7  
8  
9  
10  
11  
12  
13  
14  
15  
16  
17  
18  
19  
20  
21  
22  
23  
24  
25  
26  
27  
28  
29  
30  
31  
32  
33  
34  
35  
36  
37  
38  
39  
40  
41  
42  
43  
44  
45  
46  
47  
48  
49  
50  
51  
52  
53  
54  
55  
56  
57  
58  
59  
60

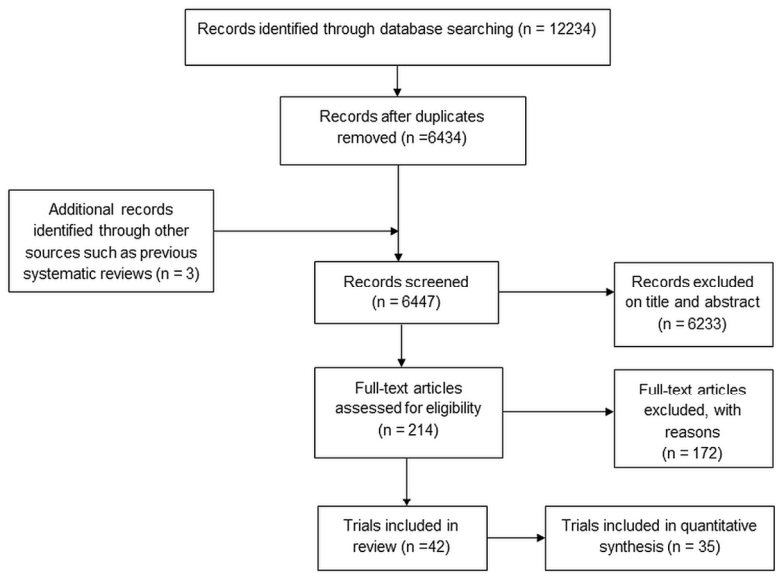

Figure 1: Search process

127x95mm (300 x 300 DPI)

ew only



1  
2  
3  
4  
5  
6  
7  
8  
9  
10  
11  
12  
13  
14  
15  
16  
17  
18  
19  
20  
21  
22  
23  
24  
25  
26  
27  
28  
29  
30  
31  
32  
33  
34  
35  
36  
37  
38  
39  
40  
41  
42  
43  
44  
45  
46  
47  
48  
49  
50  
51  
52  
53  
54  
55  
56  
57  
58  
59  
60

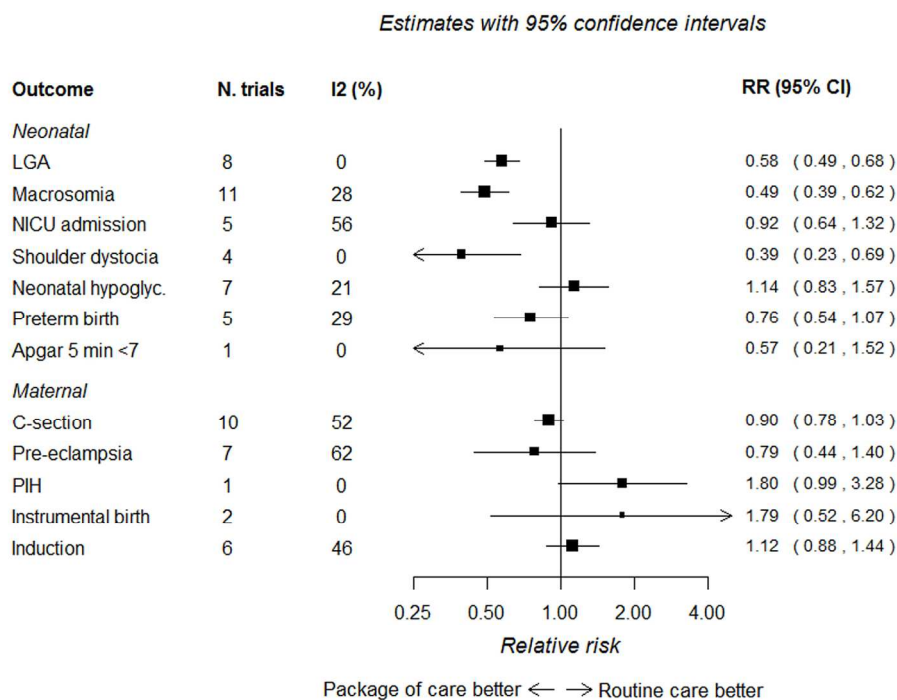

Figure 2a: Packages of care (starting with dietary modification) versus routine care: dichotomous outcomes

127x103mm (300 x 300 DPI)

1  
2  
3  
4  
5  
6  
7  
8  
9  
10  
11  
12  
13  
14  
15  
16  
17  
18  
19  
20  
21  
22  
23  
24  
25  
26  
27  
28  
29  
30  
31  
32  
33  
34  
35  
36  
37  
38  
39  
40  
41  
42  
43  
44  
45  
46  
47  
48  
49  
50  
51  
52  
53  
54  
55  
56  
57  
58  
59  
60

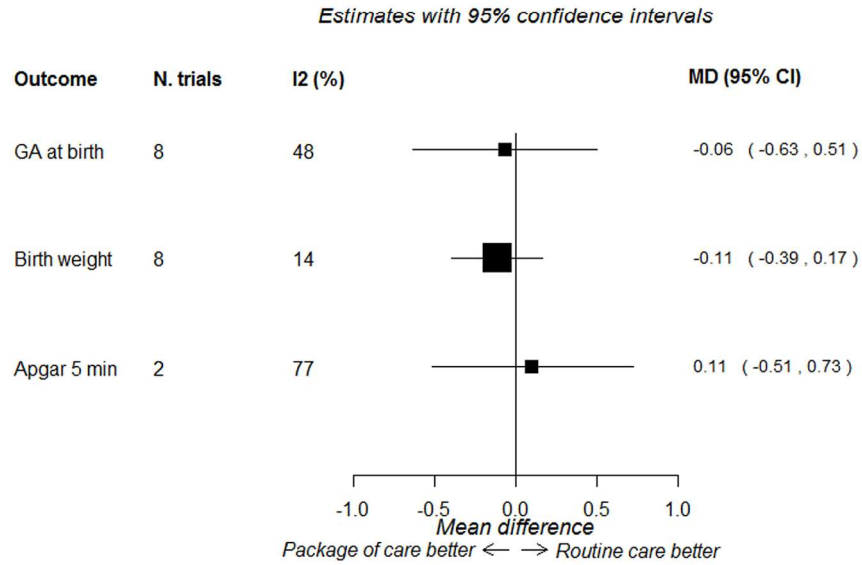

Figure 2b: Packages of care (starting with dietary modification) versus routine care: continuous outcomes

127x85mm (300 x 300 DPI)

View only

1  
2  
3  
4  
5  
6  
7  
8  
9  
10  
11  
12  
13  
14  
15  
16  
17  
18  
19  
20  
21  
22  
23  
24  
25  
26  
27  
28  
29  
30  
31  
32  
33  
34  
35  
36  
37  
38  
39  
40  
41  
42  
43  
44  
45  
46  
47  
48  
49  
50  
51  
52  
53  
54  
55  
56  
57  
58  
59  
60

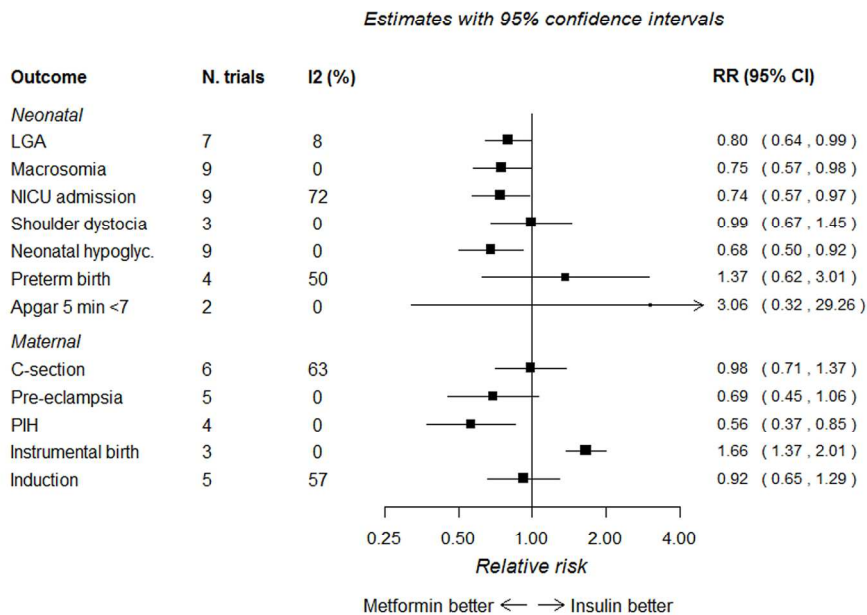

Figure 2c: Metformin versus insulin: dichotomous outcomes

127x91mm (300 x 300 DPI)

1  
2  
3  
4  
5  
6  
7  
8  
9  
10  
11  
12  
13  
14  
15  
16  
17  
18  
19  
20  
21  
22  
23  
24  
25  
26  
27  
28  
29  
30  
31  
32  
33  
34  
35  
36  
37  
38  
39  
40  
41  
42  
43  
44  
45  
46  
47  
48  
49  
50  
51  
52  
53  
54  
55  
56  
57  
58  
59  
60

Estimates with 95% confidence intervals

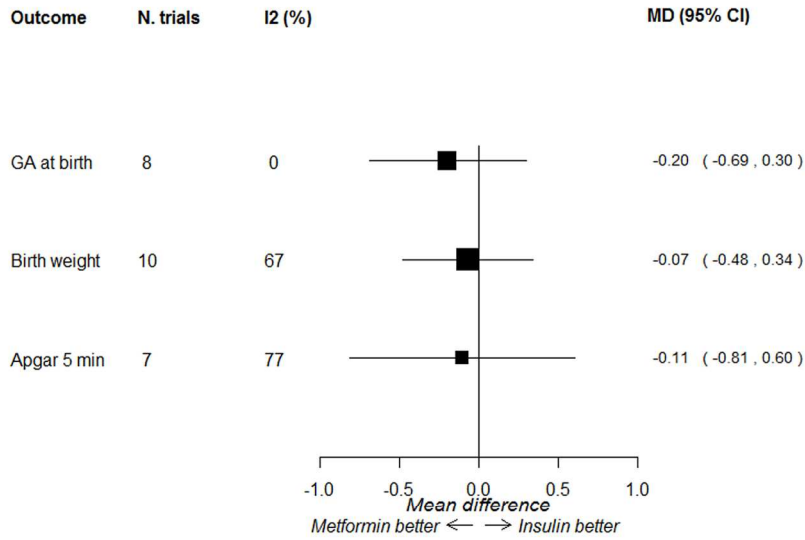

Figure 2d: Metformin versus insulin: continuous outcomes

127x107mm (300 x 300 DPI)

1  
2  
3  
4  
5  
6  
7  
8  
9  
10  
11  
12  
13  
14  
15  
16  
17  
18  
19  
20  
21  
22  
23  
24  
25  
26  
27  
28  
29  
30  
31  
32  
33  
34  
35  
36  
37  
38  
39  
40  
41  
42  
43  
44  
45  
46  
47  
48  
49  
50  
51  
52  
53  
54  
55  
56  
57  
58  
59  
60

Estimates with 95% confidence intervals

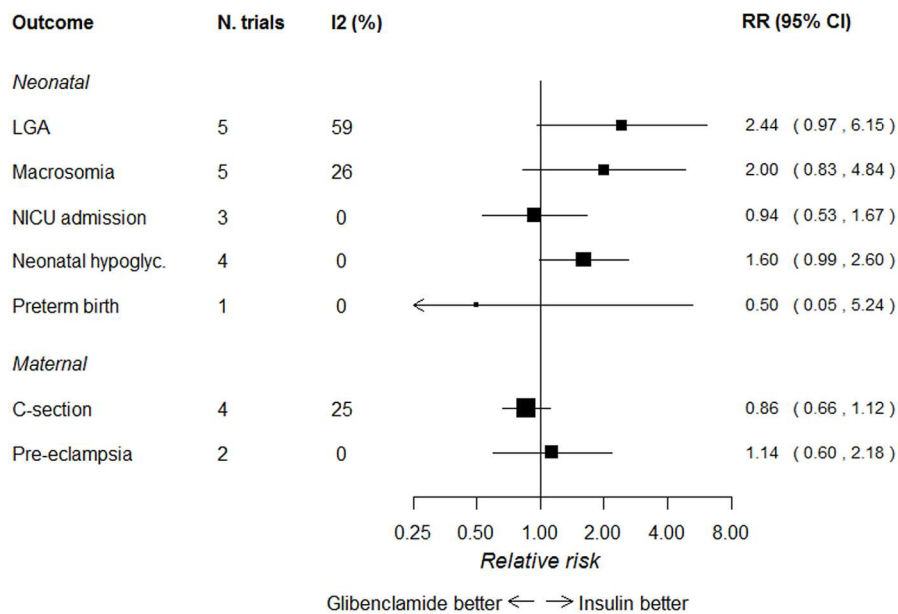

Figure 2e: Glibenclamide versus insulin: dichotomous outcomes

127x103mm (300 x 300 DPI)

1  
2  
3  
4  
5  
6  
7  
8  
9  
10  
11  
12  
13  
14  
15  
16  
17  
18  
19  
20  
21  
22  
23  
24  
25  
26  
27  
28  
29  
30  
31  
32  
33  
34  
35  
36  
37  
38  
39  
40  
41  
42  
43  
44  
45  
46  
47  
48  
49  
50  
51  
52  
53  
54  
55  
56  
57  
58  
59  
60

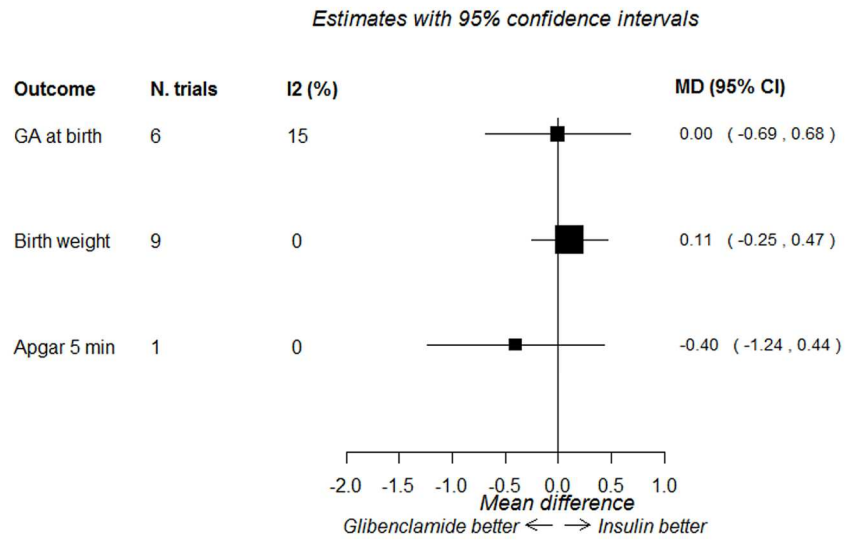

Figure 2f: Glibenclamide versus insulin: continuous outcomes

127x79mm (300 x 300 DPI)

Review only

1  
2  
3  
4  
5  
6  
7  
8  
9  
10  
11  
12  
13  
14  
15  
16  
17  
18  
19  
20  
21  
22  
23  
24  
25  
26  
27  
28  
29  
30  
31  
32  
33  
34  
35  
36  
37  
38  
39  
40  
41  
42  
43  
44  
45  
46  
47  
48  
49  
50  
51  
52  
53  
54  
55  
56  
57  
58  
59  
60

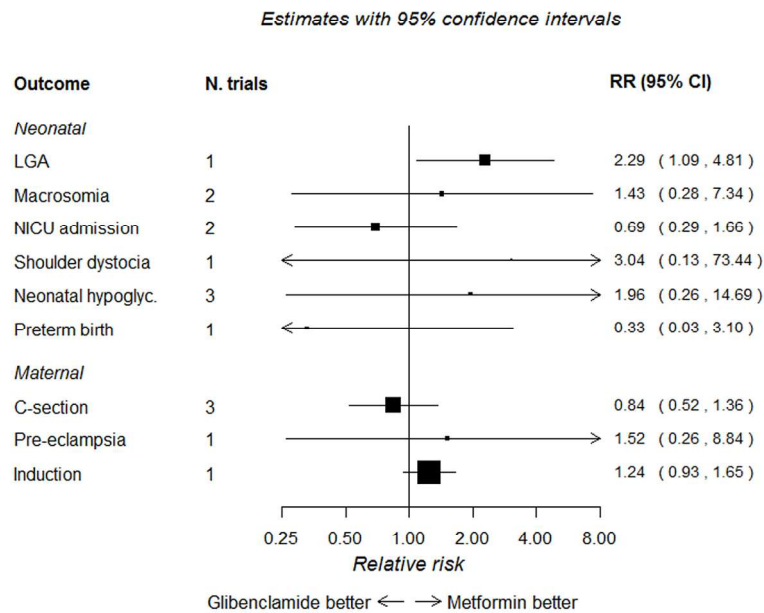

Figure 2g: Glibenclamide versus metformin: dichotomous outcomes

127x91mm (300 x 300 DPI)

1  
2  
3  
4  
5  
6  
7  
8  
9  
10  
11  
12  
13  
14  
15  
16  
17  
18  
19  
20  
21  
22  
23  
24  
25  
26  
27  
28  
29  
30  
31  
32  
33  
34  
35  
36  
37  
38  
39  
40  
41  
42  
43  
44  
45  
46  
47  
48  
49  
50  
51  
52  
53  
54  
55  
56  
57  
58  
59  
60

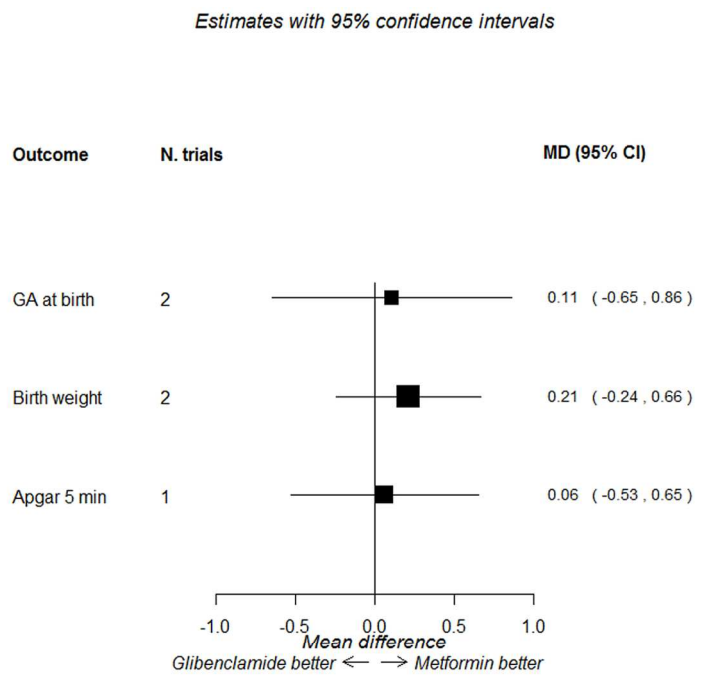

Figure 2h: Glibenclamide versus metformin: continuous outcomes

127x107mm (300 x 300 DPI)



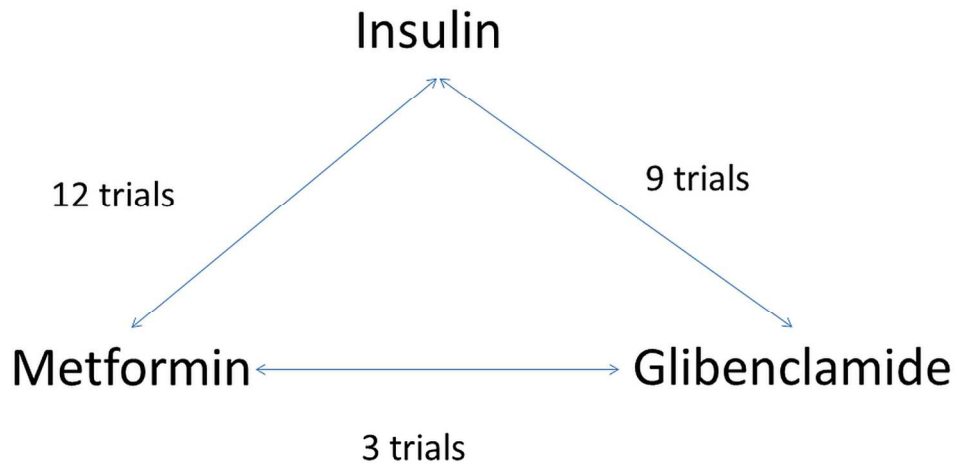

Figure 3: Network meta-analysis, relationship of treatment comparisons

127x95mm (300 x 300 DPI)

ew only

1  
2  
3  
4  
5  
6  
7  
8  
9  
10  
11  
12  
13  
14  
15  
16  
17  
18  
19  
20  
21  
22  
23  
24  
25  
26  
27  
28  
29  
30  
31  
32  
33  
34  
35  
36  
37  
38  
39  
40  
41  
42  
43  
44  
45  
46  
47  
48  
49  
50  
51  
52  
53  
54  
55  
56  
57  
58  
59  
60

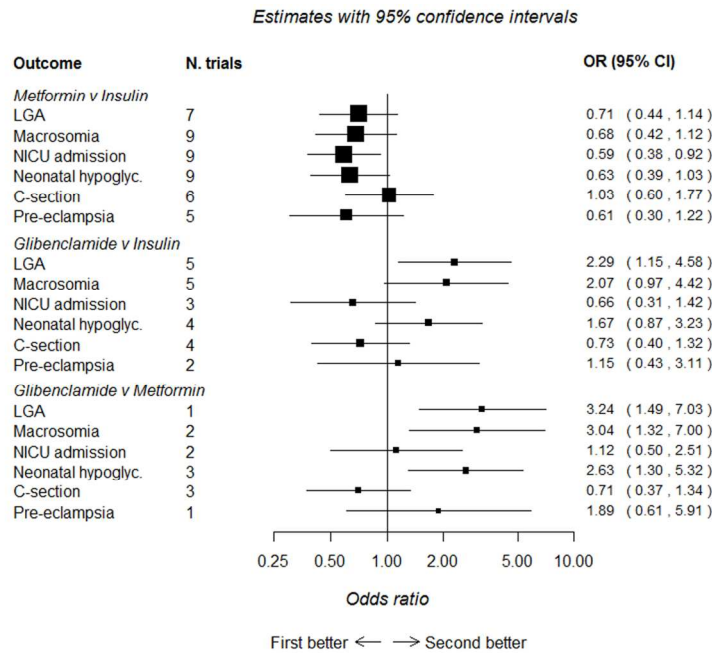

Figure 4: Network meta-analysis comparing metformin, glibenclamide and insulin. First better – treatment listed first in the outcome column is superior; second better – treatment listed second in the outcome column is superior.

127x96mm (300 x 300 DPI)

**Supplementary file 1: Search strategy**

- 1 exp diabetes, gestational/ (8715)
- 2 (gestation\$ adj4 diabet\$).ti,ab. (10162)
- 3 gdm.ti,ab. (4203)
- 4 (glucose adj4 (pregnan\$ or gestation\$ or prenatal\$ or antenatal\$ or pre-natal\$ or ante-natal\$ or maternal\$)).ti,ab. (3796)
- 5 or/1-4 (15126)
- 6 Glucose Intolerance/ (7142)
- 7 Glucose Tolerance Test/ (31300)
- 8 IGT.ti,ab. (4074)
- 9 ((impair\$ or reduced) adj2 glucose).ti,ab. (19442)
- 10 (glucose adj (tolerance\$ or intolerance\$)).ti,ab. (40791)
- 11 (gtt or ogtt).ti,ab. (7907)
- 12 Prediabetic State/ (4763)
- 13 (prediabet\$ or pre-diabet\$).ti,ab. (6103)
- 14 exp Insulin Resistance/ (64450)
- 15 (metabolic syndrome\$ or syndrome\$ x or borderline diabet\$).ti,ab. (37636)
- 16 or/6-15 (134039)
- 17 exp Pregnancy/ (795751)
- 18 (pregnan\$ or gestation\$ or prenatal\$ or antenatal\$ or pre-natal\$ or ante-natal\$ or maternal\$).ti,ab. (639369)
- 19 or/17-18 (1008161)
- 20 16 and 19 (10229)
- 21 5 or 20 (20405)
- 22 randomized controlled trial.pt. (421926)
- 23 controlled clinical trial.pt. (91079)
- 24 random\$.ti,ab. (841233)
- 25 placebo.ti,ab. (176519)
- 26 drug therapy.fs. (1876752)
- 27 trial.ti,ab. (430134)
- 28 groups.ab. (1574965)
- 29 or/22-28 (3970247)
- 30 21 and 29 (6337)
- 31 (2014\$ or 2015\$ or 2016\$).ed,dc,dp,ep,vd,yr. (3346601)
- 32 30 and 31 (1671)
- 33 animals/ not humans/ (4235813)
- 34 32 not 33 (1555)

Supplementary Table 1: Quality assessment of the included trials

| Author                  | Year | Random sequence generation | Allocation concealment | Blinding of participants | Blinding of outcome assessments | Completeness of outcome data | Selective reporting |
|-------------------------|------|----------------------------|------------------------|--------------------------|---------------------------------|------------------------------|---------------------|
| Ainuddin <sup>1</sup>   | 2015 | unclear                    | high risk              | high risk                | unclear                         | low risk                     | unclear             |
| Anjalakshi <sup>2</sup> | 2007 | unclear                    | unclear                | unclear                  | unclear                         | low risk                     | unclear             |
| Asemi <sup>3</sup>      | 2014 | low risk                   | unclear                | high risk                | high risk                       | low risk                     | low risk            |
| Bertini <sup>5</sup>    | 2005 | low risk                   | low risk               | high risk                | high risk                       | low risk                     | low risk            |
| Bevier <sup>6</sup>     | 1999 | unclear                    | unclear                | high risk                | high risk                       | high risk                    | low risk            |
| Bonomo <sup>7</sup>     | 2005 | unclear                    | unclear                | high risk                | high risk                       | low risk                     | unclear             |
| Crowther <sup>8</sup>   | 2005 | low risk                   | low risk               | high risk                | low risk                        | low risk                     | low risk            |
| Cypryk <sup>9</sup>     | 2007 | unclear                    | high risk              | unclear                  | unclear                         | low risk                     | high risk           |
| Deveer <sup>10</sup>    | 2013 | high risk                  | high risk              | high risk                | high risk                       | low risk                     | low risk            |
| Elnour <sup>11</sup>    | 2008 | unclear                    | high risk              | high risk                | high risk                       | high risk                    | low risk            |
| Fadl <sup>12</sup>      | 2015 | Low risk                   | low risk               | unclear                  | unclear                         | low risk                     | unclear             |
| Garner <sup>13</sup>    | 1997 | low risk                   | high risk              | high risk                | high risk                       | low risk                     | low risk            |
| George <sup>14</sup>    | 2015 | low risk                   | high risk              | high risk                | unclear                         | low risk                     | low risk            |

| Author                        | Year | Random sequence generation | Allocation concealment | Blinding of participants | Blinding of outcome assessments | Completeness of outcome data | Selective reporting |
|-------------------------------|------|----------------------------|------------------------|--------------------------|---------------------------------|------------------------------|---------------------|
| Hague <sup>15</sup>           | 2003 | unclear                    | unclear                | unclear                  | unclear                         | unclear                      | unclear             |
| Hassan <sup>16</sup>          | 2012 | high risk                  | high risk              | unclear                  | unclear                         | low risk                     | low risk            |
| Ijas <sup>17</sup>            | 2010 | low risk                   | low risk               | high risk                | high risk                       | low risk                     | low risk            |
| Lain <sup>18</sup>            | 2009 | low risk                   | low risk               | low risk                 | low risk                        | high risk                    | low risk            |
| Landon <sup>19</sup>          | 2009 | low risk                   | low risk               | high risk                | low risk                        | low risk                     | low risk            |
| Langer <sup>20</sup>          | 2000 | low risk                   | unclear                | unclear                  | unclear                         | low risk                     | low risk            |
| Li <sup>21</sup>              | 1987 | high risk                  | unclear                | high risk                | unclear                         | low risk                     | low risk            |
| Louie <sup>22</sup>           | 2011 | low risk                   | low risk               | low risk                 | unclear                         | low risk                     | high risk           |
| Ma <sup>23</sup>              | 2015 | high risk                  | high risk              | high risk                | unclear                         | low risk                     | unclear             |
| Mesdaghinia <sup>24</sup>     | 2012 | low risk                   | low risk               | low risk                 | low risk                        | low risk                     | low risk            |
| Mirzamoradoi <sup>25</sup>    | 2015 | unclear                    | unclear                | high risk                | unclear                         | low risk                     | unclear             |
| Moore <sup>26</sup>           | 2007 | low risk                   | unclear                | unclear                  | unclear                         | low risk                     | low risk            |
| Moore <sup>27</sup>           | 2010 | low risk                   | low risk               | high risk                | high risk                       | low risk                     | low risk            |
| Moreno-Castilla <sup>28</sup> | 2013 | unclear                    | low risk               | high risk                | unclear                         | low risk                     | low risk            |
| Mukhopadhyay <sup>29</sup>    | 2012 | low risk                   | unclear                | unclear                  | unclear                         | low risk                     | low risk            |

1  
2  
3  
4  
5  
6  
7  
8  
9  
10  
11  
12  
13  
14  
15  
16  
17  
18  
19  
20  
21  
22  
23  
24  
25  
26  
27  
28  
29  
30  
31  
32  
33  
34  
35  
36  
37  
38  
39  
40  
41  
42  
43  
44  
45  
46  
47

| Author                   | Year | Random sequence generation | Allocation concealment | Blinding of participants | Blinding of outcome assessments | Completeness of outcome data | Selective reporting |
|--------------------------|------|----------------------------|------------------------|--------------------------|---------------------------------|------------------------------|---------------------|
| Niromanesh <sup>30</sup> | 2012 | low risk                   | low risk               | unclear                  | low risk                        | low risk                     | low risk            |
| Ogunyemi <sup>31</sup>   | 2007 | low risk                   | unclear                | unclear                  | unclear                         | low risk                     | unclear             |
| O'Sullivan <sup>32</sup> | 1966 | unclear                    | unclear                | high risk                | high risk                       | unclear                      | unclear             |
| Rae <sup>33</sup>        | 2000 | unclear                    | unclear                | low risk                 | unclear                         | low risk                     | high risk           |
| Rowan <sup>34</sup>      | 2008 | low risk                   | unclear                | high risk                | high risk                       | low risk                     | low risk            |
| Silva <sup>35</sup>      | 2012 | low risk                   | unclear                | high risk                | high risk                       | low risk                     | low risk            |
| Silva <sup>36</sup>      | 2007 | unclear                    | low risk               | high risk                | high risk                       | low risk                     | low risk            |
| Spaulonci <sup>37</sup>  | 2013 | low risk                   | unclear                | unclear                  | unclear                         | low risk                     | low risk            |
| Tempe <sup>38</sup>      | 2013 | unclear                    | unclear                | unclear                  | unclear                         | low risk                     | low risk            |
| Tertti <sup>39</sup>     | 2013 | unclear                    | unclear                | unclear                  | unclear                         | low risk                     | low risk            |
| Yang <sup>40</sup>       | 2014 | unclear                    | high risk              | low risk                 | high risk                       | low risk                     | unclear             |
| Yang <sup>41</sup>       | 2003 | unclear                    | unclear                | high risk                | unclear                         | high risk                    | unclear             |
| Yao <sup>42</sup>        | 2015 | unclear                    | unclear                | unclear                  | unclear                         | Low risk                     | unclear             |
| Zinnat <sup>43</sup>     | 2013 | unclear                    | unclear                | unclear                  | unclear                         | low risk                     | unclear             |

▲ = Alwan review- publications identified by their 2011 search and awaiting classification

For peer review only

1  
2  
3  
4  
5  
6  
7  
8  
9  
10  
11  
12  
13  
14  
15  
16  
17  
18  
19  
20  
21  
22  
23  
24  
25  
26  
27  
28  
29  
30  
31  
32  
33  
34  
35  
36  
37  
38  
39  
40  
41  
42  
43  
44  
45  
46  
47

1  
2  
3  
4  
5  
6  
7  
8  
9  
10  
11  
12  
13  
14  
15  
16  
17  
18  
19  
20  
21  
22  
23  
24  
25  
26  
27  
28  
29  
30  
31  
32  
33  
34  
35  
36  
37  
38  
39  
40  
41  
42  
43  
44  
45  
46  
47  
48  
49  
50  
51  
52  
53  
54  
55  
56  
57  
58  
59  
60

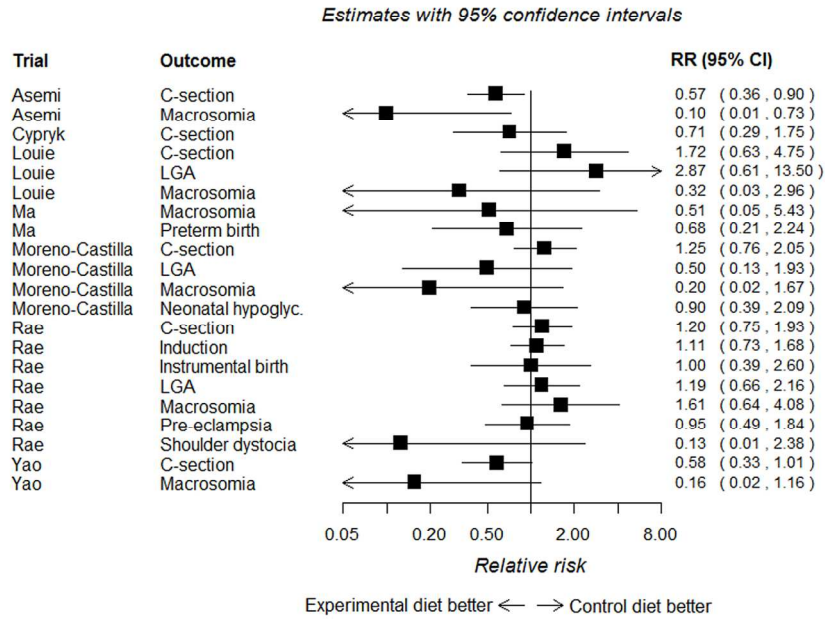

Supplementary Figure 1: Dietary modification trials: dichotomous outcomes

127x91mm (300 x 300 DPI)

View only



1  
2  
3  
4  
5  
6  
7  
8  
9  
10  
11  
12  
13  
14  
15  
16  
17  
18  
19  
20  
21  
22  
23  
24  
25  
26  
27  
28  
29  
30  
31  
32  
33  
34  
35  
36  
37  
38  
39  
40  
41  
42  
43  
44  
45  
46  
47  
48  
49  
50  
51  
52  
53  
54  
55  
56  
57  
58  
59  
60

Estimates with 95% confidence intervals

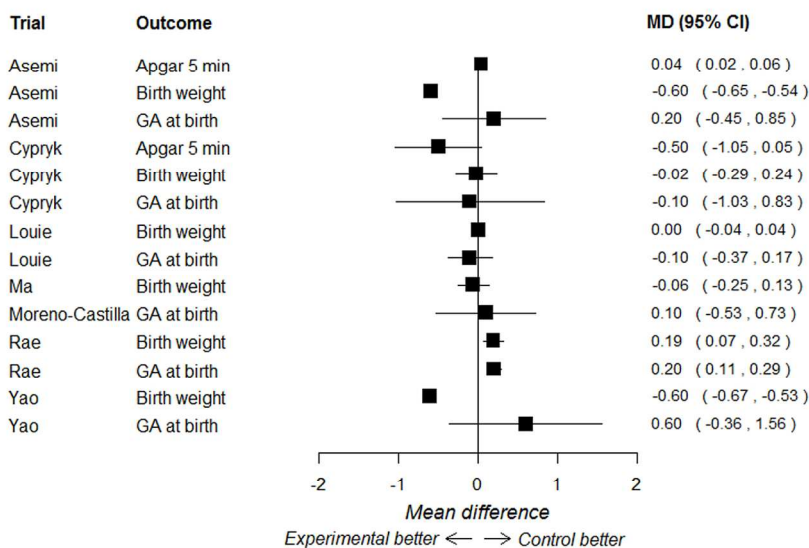

Supplementary Figure 2: Dietary modification trials: continuous outcomes

127x91mm (300 x 300 DPI)

Review only

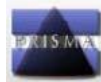

# PRISMA 2009 Checklist

| Section/topic                      | #  | Checklist item                                                                                                                                                                                                                                                                                              | Reported on page # |
|------------------------------------|----|-------------------------------------------------------------------------------------------------------------------------------------------------------------------------------------------------------------------------------------------------------------------------------------------------------------|--------------------|
| <b>TITLE</b>                       |    |                                                                                                                                                                                                                                                                                                             |                    |
| Title                              | 1  | Identify the report as a systematic review, meta-analysis, or both.                                                                                                                                                                                                                                         | 1                  |
| <b>ABSTRACT</b>                    |    |                                                                                                                                                                                                                                                                                                             |                    |
| Structured summary                 | 2  | Provide a structured summary including, as applicable: background; objectives; data sources; study eligibility criteria, participants, and interventions; study appraisal and synthesis methods; results; limitations; conclusions and implications of key findings; systematic review registration number. | 2-3                |
| <b>INTRODUCTION</b>                |    |                                                                                                                                                                                                                                                                                                             |                    |
| Rationale                          | 3  | Describe the rationale for the review in the context of what is already known.                                                                                                                                                                                                                              | 4                  |
| Objectives                         | 4  | Provide an explicit statement of questions being addressed with reference to participants, interventions, comparisons, outcomes, and study design (PICOS).                                                                                                                                                  | 4-5                |
| <b>METHODS</b>                     |    |                                                                                                                                                                                                                                                                                                             |                    |
| Protocol and registration          | 5  | Indicate if a review protocol exists, if and where it can be accessed (e.g., Web address), and, if available, provide registration information including registration number.                                                                                                                               | 2                  |
| Eligibility criteria               | 6  | Specify study characteristics (e.g., PICOS, length of follow-up) and report characteristics (e.g., years considered, language, publication status) used as criteria for eligibility, giving rationale.                                                                                                      | 6                  |
| Information sources                | 7  | Describe all information sources (e.g., databases with dates of coverage, contact with study authors to identify additional studies) in the search and date last searched.                                                                                                                                  | 5                  |
| Search                             | 8  | Present full electronic search strategy for at least one database, including any limits used, such that it could be repeated.                                                                                                                                                                               | 5 & supp file 1    |
| Study selection                    | 9  | State the process for selecting studies (i.e., screening, eligibility, included in systematic review, and, if applicable, included in the meta-analysis).                                                                                                                                                   | 6                  |
| Data collection process            | 10 | Describe method of data extraction from reports (e.g., piloted forms, independently, in duplicate) and any processes for obtaining and confirming data from investigators.                                                                                                                                  | 6                  |
| Data items                         | 11 | List and define all variables for which data were sought (e.g., PICOS, funding sources) and any assumptions and simplifications made.                                                                                                                                                                       | 6                  |
| Risk of bias in individual studies | 12 | Describe methods used for assessing risk of bias of individual studies (including specification of whether this was done at the study or outcome level), and how this information is to be used in any data synthesis.                                                                                      | 6 & supp table 1   |
| Summary measures                   | 13 | State the principal summary measures (e.g., risk ratio, difference in means).                                                                                                                                                                                                                               | 7 - 8              |
| Synthesis of results               | 14 | Describe the methods of handling data and combining results of studies, if done, including measures of consistency (e.g., $I^2$ for each meta-analysis).                                                                                                                                                    | 7 - 8              |

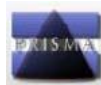

# PRISMA 2009 Checklist

Page 1 of 2

| Section/topic                 | #  | Checklist item                                                                                                                                                                                           | Reported on page #      |
|-------------------------------|----|----------------------------------------------------------------------------------------------------------------------------------------------------------------------------------------------------------|-------------------------|
| Risk of bias across studies   | 15 | Specify any assessment of risk of bias that may affect the cumulative evidence (e.g., publication bias, selective reporting within studies).                                                             | Sup Table 1             |
| Additional analyses           | 16 | Describe methods of additional analyses (e.g., sensitivity or subgroup analyses, meta-regression), if done, indicating which were pre-specified.                                                         | -                       |
| <b>RESULTS</b>                |    |                                                                                                                                                                                                          |                         |
| Study selection               | 17 | Give numbers of studies screened, assessed for eligibility, and included in the review, with reasons for exclusions at each stage, ideally with a flow diagram.                                          | 8, figure 1 and Table 1 |
| Study characteristics         | 18 | For each study, present characteristics for which data were extracted (e.g., study size, PICOS, follow-up period) and provide the citations.                                                             | 8 - 9                   |
| Risk of bias within studies   | 19 | Present data on risk of bias of each study and, if available, any outcome level assessment (see item 12).                                                                                                | 9 supp Table 1          |
| Results of individual studies | 20 | For all outcomes considered (benefits or harms), present, for each study: (a) simple summary data for each intervention group (b) effect estimates and confidence intervals, ideally with a forest plot. | -                       |
| Synthesis of results          | 21 | Present results of each meta-analysis done, including confidence intervals and measures of consistency.                                                                                                  | 8-13<br>Figures 2-9     |
| Risk of bias across studies   | 22 | Present results of any assessment of risk of bias across studies (see Item 15).                                                                                                                          | Supp Table 1            |
| Additional analysis           | 23 | Give results of additional analyses, if done (e.g., sensitivity or subgroup analyses, meta-regression [see Item 16]).                                                                                    | Table 10                |
| <b>DISCUSSION</b>             |    |                                                                                                                                                                                                          |                         |
| Summary of evidence           | 24 | Summarize the main findings including the strength of evidence for each main outcome; consider their relevance to key groups (e.g., healthcare providers, users, and policy makers).                     | 13-16                   |
| Limitations                   | 25 | Discuss limitations at study and outcome level (e.g., risk of bias), and at review-level (e.g., incomplete retrieval of identified research, reporting bias).                                            | 15-16                   |
| Conclusions                   | 26 | Provide a general interpretation of the results in the context of other evidence, and implications for future research.                                                                                  | 13-15                   |
| <b>FUNDING</b>                |    |                                                                                                                                                                                                          |                         |
| Funding                       | 27 | Describe sources of funding for the systematic review and other support (e.g., supply of data); role of funders for the systematic review.                                                               | 17                      |

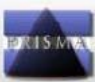

# PRISMA 2009 Checklist

1  
2  
3  
4  
5  
6  
7  
8  
9  
10  
11  
12  
13  
14  
15  
16  
17  
18  
19  
20  
21  
22  
23  
24  
25  
26  
27  
28  
29  
30  
31  
32  
33  
34  
35  
36  
37  
38  
39  
40  
41  
42  
43  
44  
45  
46  
47  
48  
49

*From:* Moher D, Liberati A, Tetzlaff J, Altman DG, The PRISMA Group (2009). Preferred Reporting Items for Systematic Reviews and Meta-Analyses: The PRISMA Statement. PLoS Med 6(6): e1000097. doi:10.1371/journal.pmed1000097

For more information, visit: [www.prisma-statement.org](http://www.prisma-statement.org).

Page 2 of 2

For peer review only
