# Supplementary material for: Treatments for gestational diabetes: a systematic review and meta-analysis
Source: PubMed Central journal article supplement (PMC5734427; doi:10.1136/bmjopen-2016-015557), 2017-06-24
Supplement: bmjopen-2016-015557supp001.pdf [file bmjopen-2016-015557supp001.pdf]

## Supplementary file 1: Search strategy

- 1 exp diabetes, gestational/ (8715)
- 2 (gestation\$ adj4 diabet\$).ti,ab. (10162)
- 3 gdm.ti,ab. (4203)
- 4 (glucose adj4 (pregnan\$ or gestation\$ or prenatal\$ or antenatal\$ or pre-natal\$ or ante-natal\$ or maternal\$)).ti,ab. (3796)
- 5 or/1-4 (15126)
- 6 Glucose Intolerance/ (7142)
- 7 Glucose Tolerance Test/ (31300)
- 8 IGT.ti,ab. (4074)
- 9 ((impair\$ or reduced) adj2 glucose).ti,ab. (19442)
- 10 (glucose adj (tolerance\$ or intolerance\$)).ti,ab. (40791)
- 11 (gtt or ogtt).ti,ab. (7907)
- 12 Prediabetic State/ (4763)
- 13 (prediabet\$ or pre-diabet\$).ti,ab. (6103)
- 14 exp Insulin Resistance/ (64450)
- 15 (metabolic syndrome\$ or syndrome\$ x or borderline diabet\$).ti,ab. (37636)
- 16 or/6-15 (134039)
- 17 exp Pregnancy/ (795751)
- 18 (pregnan\$ or gestation\$ or prenatal\$ or antenatal\$ or pre-natal\$ or ante-natal\$ or maternal\$).ti,ab. (639369)
- 19 or/17-18 (1008161)
- 20 16 and 19 (10229)
- 21 5 or 20 (20405)
- 22 randomized controlled trial.pt. (421926)
- 23 controlled clinical trial.pt. (91079)
- 24 random\$.ti,ab. (841233)
- 25 placebo.ti,ab. (176519)
- 26 drug therapy.fs. (1876752)
- 27 trial.ti,ab. (430134)
- 28 groups.ab. (1574965)
- 29 or/22-28 (3970247)
- 30 21 and 29 (6337)
- 31 (2014\$ or 2015\$ or 2016\$).ed,dc,dp,ep,vd,yr. (3346601)
- 32 30 and 31 (1671)
- 33 animals/ not humans/ (4235813)
- 34 32 not 33 (1555)
