# Supplementary material for: Treatments for gestational diabetes: a systematic review and meta-analysis
Source: PubMed Central journal article supplement (PMC5734427; doi:10.1136/bmjopen-2016-015557), 2017-06-24
Supplement: bmjopen-2016-015557supp002.pdf [file bmjopen-2016-015557supp002.pdf]

Supplementary Table 1: Quality assessment of the included trials

| Author                  | Year | Random sequence generation | Allocation concealment | Blinding of participants | Blinding of outcome assessments | Completeness of outcome data | Selective reporting |
|-------------------------|------|----------------------------|------------------------|--------------------------|---------------------------------|------------------------------|---------------------|
| Ainuddin <sup>1</sup>   | 2015 | unclear                    | high risk              | high risk                | unclear                         | low risk                     | unclear             |
| Anjalakshi <sup>2</sup> | 2007 | unclear                    | unclear                | unclear                  | unclear                         | low risk                     | unclear             |
| Asemi <sup>3</sup>      | 2014 | low risk                   | unclear                | high risk                | high risk                       | low risk                     | low risk            |
| Bertini <sup>5</sup>    | 2005 | low risk                   | low risk               | high risk                | high risk                       | low risk                     | low risk            |
| Bevier <sup>6</sup>     | 1999 | unclear                    | unclear                | high risk                | high risk                       | high risk                    | low risk            |
| Bonomo <sup>7</sup>     | 2005 | unclear                    | unclear                | high risk                | high risk                       | low risk                     | unclear             |
| Crowther <sup>8</sup>   | 2005 | low risk                   | low risk               | high risk                | low risk                        | low risk                     | low risk            |
| Cypryk <sup>9</sup>     | 2007 | unclear                    | high risk              | unclear                  | unclear                         | low risk                     | high risk           |
| Deveer <sup>10</sup>    | 2013 | high risk                  | high risk              | high risk                | high risk                       | low risk                     | low risk            |
| Elnour <sup>11</sup>    | 2008 | unclear                    | high risk              | high risk                | high risk                       | high risk                    | low risk            |
| Fadl <sup>12</sup>      | 2015 | Low risk                   | low risk               | unclear                  | unclear                         | low risk                     | unclear             |
| Garner <sup>13</sup>    | 1997 | low risk                   | high risk              | high risk                | high risk                       | low risk                     | low risk            |
| George <sup>14</sup>    | 2015 | low risk                   | high risk              | high risk                | unclear                         | low risk                     | low risk            |

| Author                        | Year | Random sequence generation | Allocation concealment | Blinding of participants | Blinding of outcome assessments | Completeness of outcome data | Selective reporting |
|-------------------------------|------|----------------------------|------------------------|--------------------------|---------------------------------|------------------------------|---------------------|
| Hague <sup>15</sup>           | 2003 | unclear                    | unclear                | unclear                  | unclear                         | unclear                      | unclear             |
| Hassan <sup>16</sup>          | 2012 | high risk                  | high risk              | unclear                  | unclear                         | low risk                     | low risk            |
| Ijas <sup>17</sup>            | 2010 | low risk                   | low risk               | high risk                | high risk                       | low risk                     | low risk            |
| Lain <sup>18</sup>            | 2009 | low risk                   | low risk               | low risk                 | low risk                        | high risk                    | low risk            |
| Landon <sup>19</sup>          | 2009 | low risk                   | low risk               | high risk                | low risk                        | low risk                     | low risk            |
| Langer <sup>20</sup>          | 2000 | low risk                   | unclear                | unclear                  | unclear                         | low risk                     | low risk            |
| Li <sup>21</sup>              | 1987 | high risk                  | unclear                | high risk                | unclear                         | low risk                     | low risk            |
| Louie <sup>22</sup>           | 2011 | low risk                   | low risk               | low risk                 | unclear                         | low risk                     | high risk           |
| Ma <sup>23</sup>              | 2015 | high risk                  | high risk              | high risk                | unclear                         | low risk                     | unclear             |
| Mesdaghinia <sup>24</sup>     | 2012 | low risk                   | low risk               | low risk                 | low risk                        | low risk                     | low risk            |
| Mirzamoradi <sup>25</sup>     | 2015 | unclear                    | unclear                | high risk                | unclear                         | low risk                     | unclear             |
| Moore <sup>26</sup>           | 2007 | low risk                   | unclear                | unclear                  | unclear                         | low risk                     | low risk            |
| Moore <sup>27</sup>           | 2010 | low risk                   | low risk               | high risk                | high risk                       | low risk                     | low risk            |
| Moreno-Castilla <sup>28</sup> | 2013 | unclear                    | low risk               | high risk                | unclear                         | low risk                     | low risk            |
| Mukhopadhyay <sup>29</sup>    | 2012 | low risk                   | unclear                | unclear                  | unclear                         | low risk                     | low risk            |

| Author                   | Year | Random sequence generation | Allocation concealment | Blinding of participants | Blinding of outcome assessments | Completeness of outcome data | Selective reporting |
|--------------------------|------|----------------------------|------------------------|--------------------------|---------------------------------|------------------------------|---------------------|
| Niromanesh <sup>30</sup> | 2012 | low risk                   | low risk               | unclear                  | low risk                        | low risk                     | low risk            |
| Ogunyemi <sup>31</sup>   | 2007 | low risk                   | unclear                | unclear                  | unclear                         | low risk                     | unclear             |
| O'Sullivan <sup>32</sup> | 1966 | unclear                    | unclear                | high risk                | high risk                       | unclear                      | unclear             |
| Rae <sup>33</sup>        | 2000 | unclear                    | unclear                | low risk                 | unclear                         | low risk                     | high risk           |
| Rowan <sup>34</sup>      | 2008 | low risk                   | unclear                | high risk                | high risk                       | low risk                     | low risk            |
| Silva <sup>35</sup>      | 2012 | low risk                   | unclear                | high risk                | high risk                       | low risk                     | low risk            |
| Silva <sup>36</sup>      | 2007 | unclear                    | low risk               | high risk                | high risk                       | low risk                     | low risk            |
| Spaulonci <sup>37</sup>  | 2013 | low risk                   | unclear                | unclear                  | unclear                         | low risk                     | low risk            |
| Tempe <sup>38</sup>      | 2013 | unclear                    | unclear                | unclear                  | unclear                         | low risk                     | low risk            |
| Tertti <sup>39</sup>     | 2013 | unclear                    | unclear                | unclear                  | unclear                         | low risk                     | low risk            |
| Yang <sup>40</sup>       | 2014 | unclear                    | high risk              | low risk                 | high risk                       | low risk                     | unclear             |
| Yang <sup>41</sup>       | 2003 | unclear                    | unclear                | high risk                | unclear                         | high risk                    | unclear             |
| Yao <sup>42</sup>        | 2015 | unclear                    | unclear                | unclear                  | unclear                         | Low risk                     | unclear             |
| Zinnat <sup>43</sup>     | 2013 | unclear                    | unclear                | unclear                  | unclear                         | low risk                     | unclear             |

▲ = Alwan review- publications identified by their 2011 search and awaiting classification
